# Supplementary material for: MolData, A Molecular Benchmark for Disease and Target Based Machine Learning
Source: Research Square preprint supplement (doi:10.21203/rs.3.rs-968557/v1), 2021-10-14
Supplement: Supplementary file 1 [file 25d375d81589e06c2e5de60f.xlsx]

## Sheet: everything
AID	run_type	accuracy_score	recall_score	precision_score	roc_auc_score	model_dir
Enzyme (other)	Enzyme (other)	66.72	74.39	1.92	0.7871	built_models/moldata/GraphConv/1006-0146/
Epigenetic regulator	Epigenetic regulator	70.35	68.11	3.91	0.7865	built_models/moldata/GraphConv/1006-0641/
Hydrolase	Hydrolase	71.7	67.23	2.85	0.7774	built_models/moldata/GraphConv/1006-0419/
Ion channel	Ion channel	67.58	59.85	1.76	0.7104	built_models/moldata/GraphConv/1006-0914/
Kinase	Kinase	65.41	56.9	1.39	0.6664	built_models/moldata/GraphConv/1006-0645/
Membrane receptor	Membrane receptor	66.91	62.36	1.69	0.7051	built_models/moldata/GraphConv/1006-0146/
NTPase	NTPase	82.09	42.3	19.03	0.7703	built_models/moldata/GraphConv/1006-1136/
Nuclear receptor	Nuclear receptor	62.63	73.6	11.25	0.7483	built_models/moldata/GraphConv/1006-0423/
Oxidoreductase	Oxidoreductase	78.28	65.11	4.49	0.7868	built_models/moldata/GraphConv/1006-0906/
Phosphatase	Phosphatase	73.24	68.72	1.91	0.796	built_models/moldata/GraphConv/1006-1129/
Protease	Protease	72.41	67.33	2.47	0.7606	built_models/moldata/GraphConv/1006-0416/
Transcription factor	Transcription factor	71.59	66.59	10.07	0.7565	built_models/moldata/GraphConv/1006-0649/
Transferase	Transferase	79.51	66.39	3.36	0.8079	built_models/moldata/GraphConv/1006-0910/
Transporter	Transporter	67.66	48.54	1.67	0.6525	built_models/moldata/GraphConv/1006-1140/
activity_1007	all_disease	54.47	72.73	0.07	0.7316	built_models/moldata/GraphConv/0921-2134/
activity_1007	Ion channel	35.92	63.64	0.04	0.5845	built_models/moldata/GraphConv/1006-0914/
activity_1007	all_target	54.51	81.82	0.08	0.76	built_models/moldata/GraphConv/1006-0146/
activity_1007	cancer	45.31	63.64	0.05	0.6995	built_models/moldata/GraphConv/0921-2134/
activity_1008	all_disease	86.85	57.58	0.59	0.7423	built_models/moldata/GraphConv/0921-2134/
activity_1008	cancer	87.2	57.58	0.6	0.7554	built_models/moldata/GraphConv/0921-2134/
activity_1009	cancer	92.63	11.11	0.22	0.5773	built_models/moldata/GraphConv/0921-2134/
activity_1009	all_disease	73.7	36.11	0.2	0.599	built_models/moldata/GraphConv/0921-2134/
activity_1012	cardiovascular	86.25	62.12	1.2	0.8304	built_models/moldata/GraphConv/0923-1718/
activity_1012	aging	74.87	81.82	0.86	0.8794	built_models/moldata/GraphConv/0925-0951/
activity_1012	all_target	81.82	68.18	0.99	0.8495	built_models/moldata/GraphConv/1006-0146/
activity_1012	Enzyme (other)	88.92	68.18	1.63	0.8618	built_models/moldata/GraphConv/1006-0146/
activity_1012	all_disease	84.74	74.24	1.29	0.8829	built_models/moldata/GraphConv/0921-2134/
activity_1021	cancer	45.88	80.47	1.58	0.7279	built_models/moldata/GraphConv/0921-2134/
activity_1021	all_disease	40.65	80.81	1.45	0.7114	built_models/moldata/GraphConv/0921-2134/
activity_1022	all_disease	78.2	73.48	6.02	0.8252	built_models/moldata/GraphConv/0921-2134/
activity_1022	cancer	75.29	67.39	4.94	0.7896	built_models/moldata/GraphConv/0921-2134/
activity_1029	infection	67.04	42.86	0.12	0.5402	built_models/moldata/GraphConv/0924-2348/
activity_1029	all_disease	63.99	35.71	0.09	0.574	built_models/moldata/GraphConv/0921-2134/
activity_1030	all_target	66.92	62.1	20.43	0.707	built_models/moldata/GraphConv/1006-0146/
activity_1030	obesity	69.65	50.43	19.57	0.6763	built_models/moldata/GraphConv/0924-0333/
activity_1030	Oxidoreductase	66.12	60.17	19.6	0.689	built_models/moldata/GraphConv/1006-0906/
activity_1030	all_disease	68.28	64.76	21.74	0.7279	built_models/moldata/GraphConv/0921-2134/
activity_1032	all_target	64.79	78.31	0.74	0.8015	built_models/moldata/GraphConv/1006-0146/
activity_1032	all_disease	59.19	84.34	0.69	0.8161	built_models/moldata/GraphConv/0921-2134/
activity_1032	Nuclear receptor	74.17	78.31	1.01	0.8206	built_models/moldata/GraphConv/1006-0423/
activity_1032	immune system	71.56	74.7	0.87	0.7872	built_models/moldata/GraphConv/0923-1718/
activity_1040	nervous System	83.01	47.97	3.38	0.7261	built_models/moldata/GraphConv/0921-2135/
activity_1040	immune system	85.52	41.89	3.5	0.7126	built_models/moldata/GraphConv/0923-1718/
activity_1040	all_target	88.75	37.84	4.12	0.7497	built_models/moldata/GraphConv/1006-0146/
activity_1040	obesity	81.15	44.26	2.82	0.7109	built_models/moldata/GraphConv/0924-0333/
activity_1040	Membrane receptor	81.38	47.3	3.04	0.7065	built_models/moldata/GraphConv/1006-0146/
activity_1040	all_disease	87.95	43.24	4.34	0.7545	built_models/moldata/GraphConv/0921-2134/
activity_1040	metabolic disorders	84.11	42.57	3.23	0.6927	built_models/moldata/GraphConv/0924-1336/
activity_1053175	bacteria	84.27	82.28	1.37	0.8874	built_models/moldata/GraphConv/0924-1339/
activity_1053175	all_disease	87.69	82.28	1.75	0.8928	built_models/moldata/GraphConv/0921-2134/
activity_1053197	virus	71.89	61.32	1.73	0.7216	built_models/moldata/GraphConv/0924-0334/
activity_1053197	all_disease	77.37	60.69	2.13	0.7497	built_models/moldata/GraphConv/0921-2134/
activity_1053197	Hydrolase	85.6	54.72	3.02	0.7647	built_models/moldata/GraphConv/1006-0419/
activity_1053197	all_target	72.26	65.09	1.86	0.7353	built_models/moldata/GraphConv/1006-0146/
activity_1053197	immune system	82.49	57.55	2.61	0.7576	built_models/moldata/GraphConv/0923-1718/
activity_1085	cancer	88.39	66.43	2.93	0.8294	built_models/moldata/GraphConv/0921-2134/
activity_1085	virus	90.14	57.34	2.99	0.8241	built_models/moldata/GraphConv/0924-0334/
activity_1085	all_disease	90.9	60.84	3.43	0.8432	built_models/moldata/GraphConv/0921-2134/
activity_1085	immune system	91.31	53.15	3.16	0.8095	built_models/moldata/GraphConv/0923-1718/
activity_1135	all_disease	89.31	77.78	0.26	0.8957	built_models/moldata/GraphConv/0921-2134/
activity_1135	aging	94.27	44.44	0.28	0.8364	built_models/moldata/GraphConv/0925-0951/
activity_1135	Enzyme (other)	93.67	66.67	0.38	0.8882	built_models/moldata/GraphConv/1006-0146/
activity_1135	all_target	93.91	55.56	0.33	0.8326	built_models/moldata/GraphConv/1006-0146/
activity_1159518	all_disease	86.76	50	4.82	0.769	built_models/moldata/GraphConv/0921-2134/
activity_1159518	cancer	85.49	62.5	5.38	0.7696	built_models/moldata/GraphConv/0921-2134/
activity_1159518	toxicity	89.47	50	6.06	0.7267	built_models/moldata/GraphConv/0923-1718/
activity_1159519	diabetes	55.24	81.25	4.89	0.738	built_models/moldata/GraphConv/0924-0334/
activity_1159519	cardiovascular	46.33	87.5	4.39	0.7236	built_models/moldata/GraphConv/0923-1718/
activity_1159519	immune system	62.76	62.5	4.61	0.7164	built_models/moldata/GraphConv/0923-1718/
activity_1159519	obesity	58.22	81.25	5.22	0.6894	built_models/moldata/GraphConv/0924-0333/
activity_1159519	cancer	60.31	81.25	5.49	0.7267	built_models/moldata/GraphConv/0921-2134/
activity_1159519	nervous System	60.49	75	5.13	0.7311	built_models/moldata/GraphConv/0921-2135/
activity_1159519	all_disease	66.43	87.5	6.86	0.8074	built_models/moldata/GraphConv/0921-2134/
activity_1159519	all_target	61.71	75	5.29	0.7155	built_models/moldata/GraphConv/1006-0146/
activity_1159519	toxicity	49.65	81.25	4.36	0.7172	built_models/moldata/GraphConv/0923-1718/
activity_1159519	Transcription factor	58.74	68.75	4.55	0.7126	built_models/moldata/GraphConv/1006-0649/
activity_1159523	Nuclear receptor	40.74	93.75	26.47	0.7225	built_models/moldata/GraphConv/1006-0423/
activity_1159523	all_disease	48.84	89.58	28.96	0.742	built_models/moldata/GraphConv/0921-2134/
activity_1159523	all_target	44.68	88.54	27.16	0.7232	built_models/moldata/GraphConv/1006-0146/
activity_1159523	toxicity	40.28	94.79	26.45	0.743	built_models/moldata/GraphConv/0923-1718/
activity_1159524	virus	76.6	67.98	5.7	0.7971	built_models/moldata/GraphConv/0924-0334/
activity_1159524	all_disease	80.38	65.87	6.57	0.8111	built_models/moldata/GraphConv/0921-2134/
activity_1159524	cardiovascular	64.45	74.58	4.13	0.7684	built_models/moldata/GraphConv/0923-1718/
activity_1159528	toxicity	56.76	78.41	22.33	0.7273	built_models/moldata/GraphConv/0923-1718/
activity_1159528	all_disease	66.78	76.14	27.35	0.7509	built_models/moldata/GraphConv/0921-2134/
activity_1159528	Transcription factor	48.58	76.14	18.93	0.6537	built_models/moldata/GraphConv/1006-0649/
activity_1159528	all_target	60.27	81.82	24.49	0.7572	built_models/moldata/GraphConv/1006-0146/
activity_1159531	Nuclear receptor	53.49	52.94	4.64	0.5371	built_models/moldata/GraphConv/1006-0423/
activity_1159531	cancer	51.08	58.82	4.85	0.5958	built_models/moldata/GraphConv/0921-2134/
activity_1159531	all_disease	54.22	52.94	4.71	0.6172	built_models/moldata/GraphConv/0921-2134/
activity_1159531	all_target	46.99	58.82	4.48	0.5915	built_models/moldata/GraphConv/1006-0146/
activity_1159531	toxicity	38.07	76.47	4.89	0.5891	built_models/moldata/GraphConv/0923-1718/
activity_1159531	cardiovascular	60.96	41.18	4.4	0.5497	built_models/moldata/GraphConv/0923-1718/
activity_1159555	Nuclear receptor	53.16	82.41	30.48	0.6793	built_models/moldata/GraphConv/1006-0423/
activity_1159555	all_disease	65.4	69.44	36.41	0.7353	built_models/moldata/GraphConv/0921-2134/
activity_1159555	all_target	61.18	78.7	34.55	0.7272	built_models/moldata/GraphConv/1006-0146/
activity_1159555	toxicity	53.38	76.85	29.75	0.652	built_models/moldata/GraphConv/0923-1718/
activity_1203	all_disease	83.99	81.82	0.23	0.863	built_models/moldata/GraphConv/0921-2134/
activity_1203	immune system	80.85	63.64	0.15	0.7868	built_models/moldata/GraphConv/0923-1718/
activity_1203	nervous System	80.4	54.55	0.12	0.7651	built_models/moldata/GraphConv/0921-2135/
activity_1216	fungal	96.43	40.7	4.06	0.817	built_models/moldata/GraphConv/0925-0953/
activity_1216	all_disease	82.26	65.12	1.28	0.825	built_models/moldata/GraphConv/0921-2134/
activity_1217	all_target	66.79	79.89	1.78	0.8246	built_models/moldata/GraphConv/1006-0146/
activity_1217	Oxidoreductase	62.94	71.74	1.44	0.7419	built_models/moldata/GraphConv/1006-0906/
activity_1217	all_disease	69.42	86.41	2.08	0.8569	built_models/moldata/GraphConv/0921-2134/
activity_1217	metabolic disorders	56.77	80.98	1.39	0.7733	built_models/moldata/GraphConv/0924-1336/
activity_1224865	obesity	80.56	55.35	1.19	0.7571	built_models/moldata/GraphConv/0924-0333/
activity_1224865	immune system	81.68	59.75	1.36	0.7767	built_models/moldata/GraphConv/0923-1718/
activity_1224865	diabetes	86.81	57.23	1.81	0.7932	built_models/moldata/GraphConv/0924-0334/
activity_1224865	all_disease	84.34	64.15	1.7	0.8055	built_models/moldata/GraphConv/0921-2134/
activity_1224892	all_disease	45.07	88.89	24.13	0.6936	built_models/moldata/GraphConv/0921-2134/
activity_1224892	all_target	42.49	88.03	23.15	0.6889	built_models/moldata/GraphConv/1006-0146/
activity_1224892	toxicity	36.03	94.87	22.16	0.6534	built_models/moldata/GraphConv/0923-1718/
activity_1224892	Nuclear receptor	40.71	88.89	22.71	0.6159	built_models/moldata/GraphConv/1006-0423/
activity_1224893	Nuclear receptor	53.13	68.42	6.7	0.6353	built_models/moldata/GraphConv/1006-0423/
activity_1224893	all_disease	64.41	78.95	9.8	0.7342	built_models/moldata/GraphConv/0921-2134/
activity_1224893	toxicity	45.36	68.42	5.78	0.6043	built_models/moldata/GraphConv/0923-1718/
activity_1224893	all_target	48.87	68.42	6.16	0.6546	built_models/moldata/GraphConv/1006-0146/
activity_1224894	toxicity	67.5	83.33	2.51	0.7834	built_models/moldata/GraphConv/0923-1718/
activity_1224894	all_target	76	83.33	3.38	0.8333	built_models/moldata/GraphConv/1006-0146/
activity_1224894	cancer	73	83.33	3.01	0.8036	built_models/moldata/GraphConv/0921-2134/
activity_1224894	Transcription factor	78.17	50	2.29	0.7416	built_models/moldata/GraphConv/1006-0649/
activity_1224894	all_disease	78	66.67	2.99	0.8039	built_models/moldata/GraphConv/0921-2134/
activity_1224895	metabolic disorders	35.56	83.33	10.18	0.6131	built_models/moldata/GraphConv/0924-1336/
activity_1224895	Membrane receptor	47.46	75.93	11.42	0.6264	built_models/moldata/GraphConv/1006-0146/
activity_1224895	all_disease	46.67	79.63	11.68	0.7375	built_models/moldata/GraphConv/0921-2134/
activity_1224895	all_target	52.38	75.93	12.5	0.6813	built_models/moldata/GraphConv/1006-0146/
activity_1224896	cancer	69.11	50.91	14.36	0.6242	built_models/moldata/GraphConv/0921-2134/
activity_1224896	toxicity	56.05	61.82	11.76	0.6199	built_models/moldata/GraphConv/0923-1718/
activity_1224896	all_disease	72.61	52.73	16.57	0.7047	built_models/moldata/GraphConv/0921-2134/
activity_1224905	all_disease	80.32	82.68	2.55	0.8963	built_models/moldata/GraphConv/0921-2134/
activity_1224905	cancer	84.97	77.09	3.11	0.8957	built_models/moldata/GraphConv/0921-2134/
activity_1236	all_target	79.85	49.55	0.99	0.7252	built_models/moldata/GraphConv/1006-0146/
activity_1236	all_disease	77.59	58.56	1.05	0.7441	built_models/moldata/GraphConv/0921-2134/
activity_1236	cardiovascular	83.08	45.05	1.07	0.7013	built_models/moldata/GraphConv/0923-1718/
activity_1236	nervous System	77.45	55.86	1	0.7131	built_models/moldata/GraphConv/0921-2135/
activity_1236	Protease	78.54	38.74	0.73	0.6429	built_models/moldata/GraphConv/1006-0416/
activity_1259247	toxicity	56.89	84.43	33.99	0.7318	built_models/moldata/GraphConv/0923-1718/
activity_1259247	Nuclear receptor	56.3	83.61	33.55	0.7327	built_models/moldata/GraphConv/1006-0423/
activity_1259247	all_target	57.87	78.69	33.8	0.7319	built_models/moldata/GraphConv/1006-0146/
activity_1259247	all_disease	63.39	76.23	37.2	0.7534	built_models/moldata/GraphConv/0921-2134/
activity_1259248	Nuclear receptor	54.06	90.91	24.92	0.7465	built_models/moldata/GraphConv/1006-0423/
activity_1259248	all_disease	69.56	69.32	30.65	0.744	built_models/moldata/GraphConv/0921-2134/
activity_1259248	toxicity	54.24	86.36	24.36	0.7526	built_models/moldata/GraphConv/0923-1718/
activity_1259248	all_target	49.26	88.64	22.74	0.729	built_models/moldata/GraphConv/1006-0146/
activity_1259309	bacteria	82.05	74.32	2.03	0.8664	built_models/moldata/GraphConv/0924-1339/
activity_1259309	all_disease	86.75	72.97	2.69	0.8873	built_models/moldata/GraphConv/0921-2134/
activity_1259310	cancer	90.79	20.25	0.39	0.6076	built_models/moldata/GraphConv/0921-2134/
activity_1259310	all_disease	84.83	36.71	0.43	0.6511	built_models/moldata/GraphConv/0921-2134/
activity_1259311	bacteria	81.61	82.47	1.44	0.9095	built_models/moldata/GraphConv/0924-1339/
activity_1259311	all_disease	83.99	87.63	1.76	0.9191	built_models/moldata/GraphConv/0921-2134/
activity_1259313	nervous System	88.42	57.56	10.79	0.8082	built_models/moldata/GraphConv/0921-2135/
activity_1259313	all_disease	89.81	56.77	12.09	0.8202	built_models/moldata/GraphConv/0921-2134/
activity_1259313	epigenetics_genetics	88.74	49.41	9.83	0.7729	built_models/moldata/GraphConv/0924-2345/
activity_1259318	immune system	91.2	49.54	4.63	0.8428	built_models/moldata/GraphConv/0923-1718/
activity_1259318	diabetes	89.52	52.28	4.09	0.8375	built_models/moldata/GraphConv/0924-0334/
activity_1259318	obesity	86.9	58.05	3.61	0.8358	built_models/moldata/GraphConv/0924-0333/
activity_1259318	cardiovascular	83.98	66.26	3.34	0.8384	built_models/moldata/GraphConv/0923-1718/
activity_1259318	nervous System	92.06	47.42	4.94	0.8542	built_models/moldata/GraphConv/0921-2135/
activity_1259318	all_disease	89.84	57.45	4.6	0.8542	built_models/moldata/GraphConv/0921-2134/
activity_1259374	all_disease	82.97	66.84	3.27	0.8155	built_models/moldata/GraphConv/0921-2134/
activity_1259374	bacteria	82.68	62.89	3.04	0.7882	built_models/moldata/GraphConv/0924-1339/
activity_1259374	cancer	84.21	62.11	3.29	0.7979	built_models/moldata/GraphConv/0921-2134/
activity_1259387	toxicity	56.68	78.57	7.14	0.7214	built_models/moldata/GraphConv/0923-1718/
activity_1259387	all_disease	59.94	89.29	8.56	0.8349	built_models/moldata/GraphConv/0921-2134/
activity_1259387	all_target	54.15	89.29	7.55	0.8432	built_models/moldata/GraphConv/1006-0146/
activity_1259387	Nuclear receptor	45.1	82.14	5.93	0.7926	built_models/moldata/GraphConv/1006-0423/
activity_1259388	all_disease	80.17	81.25	16.56	0.8571	built_models/moldata/GraphConv/0921-2134/
activity_1259388	toxicity	64.11	71.88	8.78	0.7696	built_models/moldata/GraphConv/0923-1718/
activity_1259388	Epigenetic regulator	69.18	71.88	10.13	0.8026	built_models/moldata/GraphConv/1006-0641/
activity_1259388	all_target	74.67	71.88	12.17	0.8268	built_models/moldata/GraphConv/1006-0146/
activity_1259390	toxicity	61.38	57.14	1.59	0.663	built_models/moldata/GraphConv/0923-1718/
activity_1259390	all_disease	68.92	42.86	1.49	0.7294	built_models/moldata/GraphConv/0921-2134/
activity_1259390	Transcription factor	73.69	71.43	2.87	0.7383	built_models/moldata/GraphConv/1006-0649/
activity_1259390	all_target	68.92	71.43	2.44	0.7572	built_models/moldata/GraphConv/1006-0146/
activity_1259391	Nuclear receptor	59.42	100	3.81	0.95	built_models/moldata/GraphConv/1006-0423/
activity_1259391	toxicity	68.03	100	4.78	0.9655	built_models/moldata/GraphConv/0923-1718/
activity_1259391	all_disease	76.35	100	6.36	0.9725	built_models/moldata/GraphConv/0921-2134/
activity_1259391	all_target	71.53	100	5.34	0.9313	built_models/moldata/GraphConv/1006-0146/
activity_1259392	toxicity	52.77	87.26	41.52	0.7008	built_models/moldata/GraphConv/0923-1718/
activity_1259392	Transcription factor	56.76	80.89	43.49	0.6683	built_models/moldata/GraphConv/1006-0649/
activity_1259392	all_target	55.65	82.8	42.9	0.7056	built_models/moldata/GraphConv/1006-0146/
activity_1259392	all_disease	59.87	85.35	45.89	0.7393	built_models/moldata/GraphConv/0921-2134/
activity_1259393	all_disease	54.65	100	0.31	1	built_models/moldata/GraphConv/0921-2134/
activity_1259393	all_target	68.96	100	0.46	0.99	built_models/moldata/GraphConv/1006-0146/
activity_1259393	Membrane receptor	67.95	100	0.44	0.9971	built_models/moldata/GraphConv/1006-0146/
activity_1259393	metabolic disorders	60.37	100	0.36	0.9814	built_models/moldata/GraphConv/0924-1336/
activity_1259394	toxicity	54.96	85.71	3.93	0.8656	built_models/moldata/GraphConv/0923-1718/
activity_1259394	all_disease	60.15	85.71	4.43	0.8053	built_models/moldata/GraphConv/0921-2134/
activity_1259394	all_target	78.78	57.14	5.67	0.7874	built_models/moldata/GraphConv/1006-0146/
activity_1259394	Nuclear receptor	72.21	85.71	6.25	0.838	built_models/moldata/GraphConv/1006-0423/
activity_1259395	all_target	53.98	87.5	10.77	0.7609	built_models/moldata/GraphConv/1006-0146/
activity_1259395	Membrane receptor	44.93	85	8.92	0.7499	built_models/moldata/GraphConv/1006-0146/
activity_1259395	metabolic disorders	52.89	77.5	9.57	0.7104	built_models/moldata/GraphConv/0924-1336/
activity_1259395	all_disease	61.62	77.5	11.57	0.788	built_models/moldata/GraphConv/0921-2134/
activity_1259396	Nuclear receptor	51.74	79.78	24.57	0.7007	built_models/moldata/GraphConv/1006-0423/
activity_1259396	all_disease	59.3	86.52	29.17	0.7535	built_models/moldata/GraphConv/0921-2134/
activity_1259396	all_target	50.92	83.15	24.75	0.7319	built_models/moldata/GraphConv/1006-0146/
activity_1259396	toxicity	51.74	86.52	25.58	0.7327	built_models/moldata/GraphConv/0923-1718/
activity_1259400	all_disease	76.48	74.47	2.39	0.8332	built_models/moldata/GraphConv/0921-2134/
activity_1259400	cardiovascular	64.43	80.85	1.72	0.8177	built_models/moldata/GraphConv/0923-1718/
activity_1259400	all_target	74.38	73.62	2.18	0.807	built_models/moldata/GraphConv/1006-0146/
activity_1259400	Membrane receptor	63.19	74.89	1.55	0.776	built_models/moldata/GraphConv/1006-0146/
activity_1259401	metabolic disorders	58.31	60.29	20.81	0.631	built_models/moldata/GraphConv/0924-1336/
activity_1259401	all_disease	59.45	79.41	24.77	0.7184	built_models/moldata/GraphConv/0921-2134/
activity_1259401	obesity	48.97	69.12	18.8	0.619	built_models/moldata/GraphConv/0924-0333/
activity_1259401	Nuclear receptor	45.79	89.71	20.89	0.6857	built_models/moldata/GraphConv/1006-0423/
activity_1259401	cancer	55.81	77.94	22.84	0.6822	built_models/moldata/GraphConv/0921-2134/
activity_1259401	diabetes	58.31	67.65	22.22	0.6544	built_models/moldata/GraphConv/0924-0334/
activity_1259401	all_target	48.97	75	19.77	0.6542	built_models/moldata/GraphConv/1006-0146/
activity_1259402	all_disease	59.21	81.08	13.1	0.8058	built_models/moldata/GraphConv/0921-2134/
activity_1259402	diabetes	49.9	83.78	11.15	0.7629	built_models/moldata/GraphConv/0924-0334/
activity_1259402	cancer	60.99	83.78	13.96	0.8367	built_models/moldata/GraphConv/0921-2134/
activity_1259402	metabolic disorders	58.61	86.49	13.56	0.7795	built_models/moldata/GraphConv/0924-1336/
activity_1259402	Nuclear receptor	55.64	83.78	12.45	0.7802	built_models/moldata/GraphConv/1006-0423/
activity_1259402	all_target	62.18	78.38	13.68	0.8028	built_models/moldata/GraphConv/1006-0146/
activity_1259402	obesity	60.99	78.38	13.3	0.7776	built_models/moldata/GraphConv/0924-0333/
activity_1259403	cancer	47.46	86.55	30.75	0.6992	built_models/moldata/GraphConv/0921-2134/
activity_1259403	metabolic disorders	46.82	83.19	30	0.6482	built_models/moldata/GraphConv/0924-1336/
activity_1259403	obesity	50.64	78.99	31.13	0.6499	built_models/moldata/GraphConv/0924-0333/
activity_1259403	all_disease	54.66	88.24	34.43	0.7175	built_models/moldata/GraphConv/0921-2134/
activity_1259403	all_target	47.46	87.39	30.86	0.7062	built_models/moldata/GraphConv/1006-0146/
activity_1259403	diabetes	50.21	81.51	31.29	0.6789	built_models/moldata/GraphConv/0924-0334/
activity_1259403	Nuclear receptor	42.37	92.44	29.49	0.6996	built_models/moldata/GraphConv/1006-0423/
activity_1259404	Nuclear receptor	61.36	78.26	11.18	0.8193	built_models/moldata/GraphConv/1006-0423/
activity_1259404	cancer	70.5	86.96	15.38	0.847	built_models/moldata/GraphConv/0921-2134/
activity_1259404	obesity	53.79	86.96	10.31	0.8419	built_models/moldata/GraphConv/0924-0333/
activity_1259404	diabetes	53	86.96	10.15	0.8122	built_models/moldata/GraphConv/0924-0334/
activity_1259404	all_disease	61.36	91.3	12.57	0.8599	built_models/moldata/GraphConv/0921-2134/
activity_1259404	all_target	60.84	86.96	11.98	0.8472	built_models/moldata/GraphConv/1006-0146/
activity_1259404	metabolic disorders	53.79	82.61	9.9	0.7832	built_models/moldata/GraphConv/0924-1336/
activity_1259415	infection	62.71	60.89	9.29	0.6572	built_models/moldata/GraphConv/0924-2348/
activity_1259415	virus	60.94	65.41	9.42	0.6832	built_models/moldata/GraphConv/0924-0334/
activity_1259415	all_disease	70.88	58.22	11.39	0.7105	built_models/moldata/GraphConv/0921-2134/
activity_1259422	cancer	64.84	76.73	3.52	0.7706	built_models/moldata/GraphConv/0921-2134/
activity_1259422	all_disease	67.37	77.01	3.79	0.8032	built_models/moldata/GraphConv/0921-2134/
activity_1274	nervous System	33.53	82.54	0.85	0.6778	built_models/moldata/GraphConv/0921-2135/
activity_1274	all_disease	62.97	60.32	1.12	0.679	built_models/moldata/GraphConv/0921-2134/
activity_1274	immune system	54.89	70.37	1.07	0.6635	built_models/moldata/GraphConv/0923-1718/
activity_1274	cardiovascular	37.82	78.84	0.87	0.6278	built_models/moldata/GraphConv/0923-1718/
activity_1304	immune system	79.32	53.93	0.85	0.7362	built_models/moldata/GraphConv/0923-1718/
activity_1304	obesity	82.99	56.18	1.07	0.7774	built_models/moldata/GraphConv/0924-0333/
activity_1304	all_disease	80.56	68.54	1.14	0.7932	built_models/moldata/GraphConv/0921-2134/
activity_1304	metabolic disorders	69.6	71.91	0.76	0.7605	built_models/moldata/GraphConv/0924-1336/
activity_1304	Membrane receptor	73.13	74.16	0.89	0.7937	built_models/moldata/GraphConv/1006-0146/
activity_1304	all_target	74.69	70.79	0.9	0.7711	built_models/moldata/GraphConv/1006-0146/
activity_1304	nervous System	78.11	69.66	1.03	0.7952	built_models/moldata/GraphConv/0921-2135/
activity_1321	Kinase	71.21	34.69	1.42	0.548	built_models/moldata/GraphConv/1006-0645/
activity_1321	cancer	71.56	42.19	1.74	0.5792	built_models/moldata/GraphConv/0921-2134/
activity_1321	all_disease	74.75	35.94	1.68	0.5754	built_models/moldata/GraphConv/0921-2134/
activity_1321	all_target	70.53	40.31	1.61	0.5815	built_models/moldata/GraphConv/1006-0146/
activity_1325	Transporter	77.18	50	0.18	0.6572	built_models/moldata/GraphConv/1006-1140/
activity_1325	all_target	70.75	70	0.19	0.714	built_models/moldata/GraphConv/1006-0146/
activity_1325	all_disease	72.63	65	0.19	0.7202	built_models/moldata/GraphConv/0921-2134/
activity_1325	cancer	86.14	20	0.12	0.6889	built_models/moldata/GraphConv/0921-2134/
activity_1326	all_disease	68.31	71.43	0.19	0.8064	built_models/moldata/GraphConv/0921-2134/
activity_1326	all_target	79.13	61.9	0.25	0.755	built_models/moldata/GraphConv/1006-0146/
activity_1326	cancer	75.35	76.19	0.26	0.8021	built_models/moldata/GraphConv/0921-2134/
activity_1326	Transporter	66.45	47.62	0.12	0.6679	built_models/moldata/GraphConv/1006-1140/
activity_1346378	infection	53.78	85	0.37	0.8353	built_models/moldata/GraphConv/0924-2348/
activity_1346378	Transferase	54.24	90	0.39	0.827	built_models/moldata/GraphConv/1006-0910/
activity_1346378	all_disease	57.53	96.25	0.45	0.8811	built_models/moldata/GraphConv/0921-2134/
activity_1346378	all_target	54.47	93.75	0.41	0.8547	built_models/moldata/GraphConv/1006-0146/
activity_1347030	all_disease	60.96	61.54	2.96	0.6131	built_models/moldata/GraphConv/0921-2134/
activity_1347030	toxicity	54.82	61.54	2.56	0.6262	built_models/moldata/GraphConv/0923-1718/
activity_1347030	all_target	60.53	69.23	3.27	0.6728	built_models/moldata/GraphConv/1006-0146/
activity_1347030	Membrane receptor	51.32	69.23	2.66	0.6404	built_models/moldata/GraphConv/1006-0146/
activity_1347031	toxicity	56.67	92.91	35.44	0.7805	built_models/moldata/GraphConv/0923-1718/
activity_1347031	all_target	54.35	86.61	33.43	0.747	built_models/moldata/GraphConv/1006-0146/
activity_1347031	Nuclear receptor	54.93	90.55	34.23	0.7658	built_models/moldata/GraphConv/1006-0423/
activity_1347031	all_disease	64.02	90.55	39.79	0.8019	built_models/moldata/GraphConv/0921-2134/
activity_1347032	Transcription factor	54.88	70.59	20.41	0.6541	built_models/moldata/GraphConv/1006-0649/
activity_1347032	toxicity	56.1	70.59	20.91	0.6741	built_models/moldata/GraphConv/0923-1718/
activity_1347032	all_target	64.11	60	22.87	0.6884	built_models/moldata/GraphConv/1006-0146/
activity_1347032	all_disease	60.98	72.94	23.57	0.7014	built_models/moldata/GraphConv/0921-2134/
activity_1347033	toxicity	66.43	90.36	60.53	0.7665	built_models/moldata/GraphConv/0923-1718/
activity_1347033	all_disease	70.8	88.93	64.68	0.8058	built_models/moldata/GraphConv/0921-2134/
activity_1347034	Protease	59.7	64	16.72	0.6501	built_models/moldata/GraphConv/1006-0416/
activity_1347034	all_target	55.91	70.67	16.46	0.6713	built_models/moldata/GraphConv/1006-0146/
activity_1347034	cancer	59.09	69.33	17.39	0.7037	built_models/moldata/GraphConv/0921-2134/
activity_1347034	immune system	63.79	74.67	20.29	0.7377	built_models/moldata/GraphConv/0923-1718/
activity_1347034	all_disease	64.85	70.67	20.15	0.7425	built_models/moldata/GraphConv/0921-2134/
activity_1347036	Nuclear receptor	76.27	88.24	8.52	0.905	built_models/moldata/GraphConv/1006-0423/
activity_1347036	all_target	68.12	94.12	6.84	0.8755	built_models/moldata/GraphConv/1006-0146/
activity_1347036	all_disease	73.22	88.24	7.61	0.9044	built_models/moldata/GraphConv/0921-2134/
activity_1347036	toxicity	69.87	88.24	6.82	0.8887	built_models/moldata/GraphConv/0923-1718/
activity_1347037	cancer	56.7	71.43	8.17	0.7081	built_models/moldata/GraphConv/0921-2134/
activity_1347037	all_disease	66.22	74.29	10.66	0.7539	built_models/moldata/GraphConv/0921-2134/
activity_1347037	all_target	57.59	74.29	8.61	0.724	built_models/moldata/GraphConv/1006-0146/
activity_1347037	immune system	60.12	71.43	8.83	0.7051	built_models/moldata/GraphConv/0923-1718/
activity_1347037	Protease	48.81	68.57	6.72	0.6511	built_models/moldata/GraphConv/1006-0416/
activity_1347038	Membrane receptor	59.44	66.67	2.89	0.6415	built_models/moldata/GraphConv/1006-0146/
activity_1347038	all_disease	64.04	75	3.63	0.7069	built_models/moldata/GraphConv/0921-2134/
activity_1347038	toxicity	57.65	75	3.09	0.7269	built_models/moldata/GraphConv/0923-1718/
activity_1347038	all_target	60.77	75	3.33	0.6756	built_models/moldata/GraphConv/1006-0146/
activity_1347041	all_disease	66.77	69.15	0.42	0.7387	built_models/moldata/GraphConv/0921-2134/
activity_1347041	cancer	62.49	77.66	0.41	0.7854	built_models/moldata/GraphConv/0921-2134/
activity_1347056	all_disease	64.12	75.33	2.93	0.763	built_models/moldata/GraphConv/0921-2134/
activity_1347056	cancer	62.02	73.63	2.71	0.7485	built_models/moldata/GraphConv/0921-2134/
activity_1347071	all_disease	87.71	78.57	0.48	0.8875	built_models/moldata/GraphConv/0921-2134/
activity_1347071	all_target	90.27	71.43	0.55	0.8645	built_models/moldata/GraphConv/1006-0146/
activity_1347071	Membrane receptor	88.99	64.29	0.44	0.8553	built_models/moldata/GraphConv/1006-0146/
activity_1347071	nervous System	88.65	78.57	0.51	0.8788	built_models/moldata/GraphConv/0921-2135/
activity_1347075	cancer	78.58	60.09	5.64	0.7828	built_models/moldata/GraphConv/0921-2134/
activity_1347075	toxicity	65.85	71.59	4.19	0.7532	built_models/moldata/GraphConv/0923-1718/
activity_1347075	all_disease	79.65	61.08	6.02	0.8058	built_models/moldata/GraphConv/0921-2134/
activity_1347076	cancer	88.15	21.09	12.83	0.7128	built_models/moldata/GraphConv/0921-2134/
activity_1347076	all_disease	89.9	18.21	14.48	0.7276	built_models/moldata/GraphConv/0921-2134/
activity_1347076	toxicity	85.42	28.22	12.28	0.7098	built_models/moldata/GraphConv/0923-1718/
activity_1347120	epigenetics_genetics	47.92	88.68	0.78	0.7612	built_models/moldata/GraphConv/0924-2345/
activity_1347120	immune system	43.84	88.68	0.72	0.7981	built_models/moldata/GraphConv/0923-1718/
activity_1347120	all_disease	63.02	89.31	1.1	0.845	built_models/moldata/GraphConv/0921-2134/
activity_1347120	nervous System	51.21	86.16	0.81	0.7892	built_models/moldata/GraphConv/0921-2135/
activity_1347131	all_target	78.17	63.58	2.46	0.7909	built_models/moldata/GraphConv/1006-0146/
activity_1347131	Transferase	74.94	63.91	2.16	0.7639	built_models/moldata/GraphConv/1006-0910/
activity_1347131	cardiovascular	64.73	78.48	1.88	0.7785	built_models/moldata/GraphConv/0923-1718/
activity_1347131	virus	78.46	65.89	2.58	0.7956	built_models/moldata/GraphConv/0924-0334/
activity_1347131	all_disease	82.15	67.88	3.2	0.8226	built_models/moldata/GraphConv/0921-2134/
activity_1347165	cancer	92.55	8.27	24.3	0.7409	built_models/moldata/GraphConv/0921-2134/
activity_1347165	all_disease	93.57	7.22	45.31	0.8036	built_models/moldata/GraphConv/0921-2134/
activity_1347165	bacteria	92.55	6.52	21.37	0.6828	built_models/moldata/GraphConv/0924-1339/
activity_1347417	parasite	76.81	73.05	11.37	0.8251	built_models/moldata/GraphConv/0924-1340/
activity_1347417	all_disease	86.35	59.29	16.05	0.8532	built_models/moldata/GraphConv/0921-2134/
activity_1359	cardiovascular	78.87	47.41	0.95	0.7162	built_models/moldata/GraphConv/0923-1718/
activity_1359	nervous System	76.18	53.45	0.95	0.7325	built_models/moldata/GraphConv/0921-2135/
activity_1359	obesity	77.9	59.48	1.13	0.7385	built_models/moldata/GraphConv/0924-0333/
activity_1359	all_target	72.05	63.79	0.96	0.7301	built_models/moldata/GraphConv/1006-0146/
activity_1359	Membrane receptor	67.5	73.28	0.95	0.7654	built_models/moldata/GraphConv/1006-0146/
activity_1359	metabolic disorders	71.01	60.34	0.88	0.72	built_models/moldata/GraphConv/0924-1336/
activity_1359	all_disease	78.03	57.76	1.11	0.7225	built_models/moldata/GraphConv/0921-2134/
activity_1379	all_target	87.94	73.08	1.79	0.8964	built_models/moldata/GraphConv/1006-0146/
activity_1379	Enzyme (other)	83.2	78.21	1.38	0.8993	built_models/moldata/GraphConv/1006-0146/
activity_1379	metabolic disorders	92.55	60.26	2.4	0.8788	built_models/moldata/GraphConv/0924-1336/
activity_1379	all_disease	86.58	84.62	1.86	0.9127	built_models/moldata/GraphConv/0921-2134/
activity_1415	all_disease	38.73	66.33	0.38	0.566	built_models/moldata/GraphConv/0921-2134/
activity_1415	nervous System	35.26	72.45	0.4	0.5384	built_models/moldata/GraphConv/0921-2135/
activity_1415	cardiovascular	29.12	82.65	0.41	0.5616	built_models/moldata/GraphConv/0923-1718/
activity_1415	pulmonary	33.35	73.47	0.39	0.5434	built_models/moldata/GraphConv/0924-2348/
activity_1416	all_disease	46.84	74.36	0.2	0.6802	built_models/moldata/GraphConv/0921-2134/
activity_1416	Kinase	34.35	74.36	0.16	0.5728	built_models/moldata/GraphConv/1006-0645/
activity_1416	all_target	53.08	66.67	0.2	0.5989	built_models/moldata/GraphConv/1006-0146/
activity_1416	cancer	48.28	69.23	0.19	0.6334	built_models/moldata/GraphConv/0921-2134/
activity_1422	immune system	71.59	71.12	3.18	0.7839	built_models/moldata/GraphConv/0923-1718/
activity_1422	all_disease	64.78	82.34	2.96	0.8077	built_models/moldata/GraphConv/0921-2134/
activity_1422	nervous System	62.16	85.92	2.87	0.8158	built_models/moldata/GraphConv/0921-2135/
activity_1422	all_target	56.82	86.87	2.55	0.8088	built_models/moldata/GraphConv/1006-0146/
activity_1422	Membrane receptor	48.73	83.29	2.07	0.7296	built_models/moldata/GraphConv/1006-0146/
activity_1423	all_target	36.41	70.64	0.44	0.5544	built_models/moldata/GraphConv/1006-0146/
activity_1423	all_disease	32.77	70.64	0.41	0.5617	built_models/moldata/GraphConv/0921-2134/
activity_1423	cardiovascular	25.93	77.98	0.42	0.5643	built_models/moldata/GraphConv/0923-1718/
activity_1423	pulmonary	35.7	66.97	0.41	0.5142	built_models/moldata/GraphConv/0924-2348/
activity_1423	Enzyme (other)	32.8	73.39	0.43	0.5539	built_models/moldata/GraphConv/1006-0146/
activity_1423	nervous System	49.72	58.72	0.46	0.557	built_models/moldata/GraphConv/0921-2135/
activity_1424	nervous System	68.57	84.09	0.43	0.8339	built_models/moldata/GraphConv/0921-2135/
activity_1424	all_disease	82.81	70.45	0.66	0.8712	built_models/moldata/GraphConv/0921-2134/
activity_1424	Ion channel	55.41	88.64	0.32	0.8296	built_models/moldata/GraphConv/1006-0914/
activity_1424	all_target	70.46	86.36	0.47	0.8756	built_models/moldata/GraphConv/1006-0146/
activity_1439	cardiovascular	33.85	68.32	0.44	0.5192	built_models/moldata/GraphConv/0923-1718/
activity_1439	pulmonary	59.16	42.57	0.45	0.4924	built_models/moldata/GraphConv/0924-2348/
activity_1439	all_disease	52.43	57.43	0.52	0.5605	built_models/moldata/GraphConv/0921-2134/
activity_1439	nervous System	53.39	46.53	0.43	0.4956	built_models/moldata/GraphConv/0921-2135/
activity_1441	all_target	27.25	74.34	0.42	0.5281	built_models/moldata/GraphConv/1006-0146/
activity_1441	all_disease	23.06	75.22	0.4	0.5367	built_models/moldata/GraphConv/0921-2134/
activity_1441	cardiovascular	29.71	72.57	0.42	0.53	built_models/moldata/GraphConv/0923-1718/
activity_1441	pulmonary	25.69	73.45	0.4	0.511	built_models/moldata/GraphConv/0924-2348/
activity_1441	Enzyme (other)	30.96	71.68	0.42	0.5519	built_models/moldata/GraphConv/1006-0146/
activity_1441	nervous System	27.9	71.68	0.41	0.5265	built_models/moldata/GraphConv/0921-2135/
activity_1443	cancer	86.05	70	2.34	0.8807	built_models/moldata/GraphConv/0921-2134/
activity_1443	all_disease	91.65	66.15	3.68	0.8953	built_models/moldata/GraphConv/0921-2134/
activity_1446	all_target	56.36	79.34	1.99	0.7739	built_models/moldata/GraphConv/1006-0146/
activity_1446	immune system	57.17	75.08	1.92	0.7406	built_models/moldata/GraphConv/0923-1718/
activity_1446	Kinase	22.72	86.56	1.23	0.663	built_models/moldata/GraphConv/1006-0645/
activity_1446	cancer	51.99	81.64	1.86	0.7618	built_models/moldata/GraphConv/0921-2134/
activity_1446	all_disease	54.11	84.26	2.01	0.7745	built_models/moldata/GraphConv/0921-2134/
activity_1448	nervous System	86.44	56.16	1.1	0.7683	built_models/moldata/GraphConv/0921-2135/
activity_1448	metabolic disorders	75.51	53.42	0.58	0.736	built_models/moldata/GraphConv/0924-1336/
activity_1448	all_disease	88.92	46.58	1.12	0.7857	built_models/moldata/GraphConv/0921-2134/
activity_1452	all_target	75.31	78.95	0.29	0.8624	built_models/moldata/GraphConv/1006-0146/
activity_1452	Enzyme (other)	69.88	63.16	0.19	0.7545	built_models/moldata/GraphConv/1006-0146/
activity_1452	cancer	73.55	78.95	0.27	0.8092	built_models/moldata/GraphConv/0921-2134/
activity_1452	all_disease	78.51	84.21	0.36	0.855	built_models/moldata/GraphConv/0921-2134/
activity_1452	immune system	80.17	68.42	0.32	0.8197	built_models/moldata/GraphConv/0923-1718/
activity_1454	all_target	69.59	72.62	1.37	0.8218	built_models/moldata/GraphConv/1006-0146/
activity_1454	Kinase	44.27	80.95	0.83	0.7252	built_models/moldata/GraphConv/1006-0645/
activity_1454	all_disease	71.68	73.81	1.49	0.8203	built_models/moldata/GraphConv/0921-2134/
activity_1454	cancer	64.12	78.57	1.25	0.8101	built_models/moldata/GraphConv/0921-2134/
activity_1457	Hydrolase	73.01	83.54	0.91	0.8637	built_models/moldata/GraphConv/1006-0419/
activity_1457	all_disease	77.62	82.28	1.08	0.8827	built_models/moldata/GraphConv/0921-2134/
activity_1457	all_target	78.56	78.48	1.08	0.8687	built_models/moldata/GraphConv/1006-0146/
activity_1457	nervous System	85.34	65.82	1.32	0.8762	built_models/moldata/GraphConv/0921-2135/
activity_1458	all_disease	87.71	64.94	13.17	0.8552	built_models/moldata/GraphConv/0921-2134/
activity_1458	Epigenetic regulator	90.63	49.03	13.96	0.8287	built_models/moldata/GraphConv/1006-0641/
activity_1458	all_target	86.46	66.4	12.22	0.8486	built_models/moldata/GraphConv/1006-0146/
activity_1458	nervous System	88.57	59.09	13.16	0.8344	built_models/moldata/GraphConv/0921-2135/
activity_1460	all_disease	90.79	82.3	24.38	0.939	built_models/moldata/GraphConv/0921-2134/
activity_1460	nervous System	91.97	75.95	26.22	0.9253	built_models/moldata/GraphConv/0921-2135/
activity_1461	all_disease	81.14	69.8	4.85	0.8498	built_models/moldata/GraphConv/0921-2134/
activity_1461	all_target	76.16	72.65	4	0.8393	built_models/moldata/GraphConv/1006-0146/
activity_1461	Membrane receptor	70.26	74.07	3.28	0.8037	built_models/moldata/GraphConv/1006-0146/
activity_1461	nervous System	77.57	69.23	4.06	0.8159	built_models/moldata/GraphConv/0921-2135/
activity_1463	all_disease	89.1	88.03	7.12	0.9571	built_models/moldata/GraphConv/0921-2134/
activity_1463	nervous System	89.4	81.85	6.87	0.9426	built_models/moldata/GraphConv/0921-2135/
activity_1468	nervous System	75.11	83.2	1.49	0.8432	built_models/moldata/GraphConv/0921-2135/
activity_1468	all_disease	81.09	76.8	1.81	0.8641	built_models/moldata/GraphConv/0921-2134/
activity_1469	obesity	58.28	91.3	0.17	0.8685	built_models/moldata/GraphConv/0924-0333/
activity_1469	all_disease	84.3	73.91	0.36	0.8926	built_models/moldata/GraphConv/0921-2134/
activity_1469	Nuclear receptor	66.94	100	0.23	0.9264	built_models/moldata/GraphConv/1006-0423/
activity_1469	all_target	83.19	82.61	0.37	0.9191	built_models/moldata/GraphConv/1006-0146/
activity_1469	cardiovascular	71.47	86.96	0.23	0.9119	built_models/moldata/GraphConv/0923-1718/
activity_1471	nervous System	57.07	70.83	0.27	0.6723	built_models/moldata/GraphConv/0921-2135/
activity_1471	all_disease	32.49	87.5	0.21	0.7156	built_models/moldata/GraphConv/0921-2134/
activity_1476	all_target	80.65	81.43	13.87	0.8892	built_models/moldata/GraphConv/1006-0146/
activity_1476	parasite	78.17	78.31	12.08	0.8608	built_models/moldata/GraphConv/0924-1340/
activity_1476	Protease	70.29	84.55	9.67	0.8606	built_models/moldata/GraphConv/1006-0416/
activity_1476	all_disease	84.18	78.16	16.12	0.8877	built_models/moldata/GraphConv/0921-2134/
activity_1478	all_target	78.34	67.96	1.54	0.8085	built_models/moldata/GraphConv/1006-0146/
activity_1478	all_disease	80.21	64.08	1.59	0.8097	built_models/moldata/GraphConv/0921-2134/
activity_1478	parasite	81.66	57.28	1.54	0.7596	built_models/moldata/GraphConv/0924-1340/
activity_1478	Protease	74.75	69.9	1.36	0.7466	built_models/moldata/GraphConv/1006-0416/
activity_1479	cardiovascular	26.62	93.44	0.26	0.7262	built_models/moldata/GraphConv/0923-1718/
activity_1479	obesity	24.17	88.52	0.24	0.7373	built_models/moldata/GraphConv/0924-0333/
activity_1479	all_target	30.73	90.16	0.26	0.7592	built_models/moldata/GraphConv/1006-0146/
activity_1479	Nuclear receptor	21.86	95.08	0.24	0.7218	built_models/moldata/GraphConv/1006-0423/
activity_1479	all_disease	29.53	93.44	0.27	0.7861	built_models/moldata/GraphConv/0921-2134/
activity_1481	cancer	46.9	87.23	0.84	0.7896	built_models/moldata/GraphConv/0921-2134/
activity_1481	immune system	39.26	90.78	0.76	0.7927	built_models/moldata/GraphConv/0923-1718/
activity_1481	Transporter	24.1	95.04	0.64	0.7436	built_models/moldata/GraphConv/1006-1140/
activity_1481	all_target	58.2	82.98	1.01	0.8021	built_models/moldata/GraphConv/1006-0146/
activity_1481	nervous System	40.79	88.65	0.76	0.7791	built_models/moldata/GraphConv/0921-2135/
activity_1481	all_disease	58.62	84.4	1.04	0.8238	built_models/moldata/GraphConv/0921-2134/
activity_1486	all_disease	41.64	84.01	1.65	0.7448	built_models/moldata/GraphConv/0921-2134/
activity_1486	immune system	30.02	85.58	1.41	0.6852	built_models/moldata/GraphConv/0923-1718/
activity_1486	cancer	43.7	83.07	1.69	0.7385	built_models/moldata/GraphConv/0921-2134/
activity_1487	all_disease	89.8	25	0.11	0.726	built_models/moldata/GraphConv/0921-2134/
activity_1487	nervous System	89.02	62.5	0.25	0.7859	built_models/moldata/GraphConv/0921-2135/
activity_1487	aging	84.03	75	0.21	0.8482	built_models/moldata/GraphConv/0925-0951/
activity_1490	diabetes	66.41	72.9	9.86	0.7585	built_models/moldata/GraphConv/0924-0334/
activity_1490	all_disease	67.91	80.18	11.09	0.8205	built_models/moldata/GraphConv/0921-2134/
activity_1490	immune system	66.28	76.12	10.17	0.7771	built_models/moldata/GraphConv/0923-1718/
activity_1490	obesity	70.31	73.56	11.14	0.7782	built_models/moldata/GraphConv/0924-0333/
activity_1490	all_target	69.22	77.17	11.19	0.808	built_models/moldata/GraphConv/1006-0146/
activity_1490	Transferase	58.2	81.17	8.77	0.7788	built_models/moldata/GraphConv/1006-0910/
activity_1490	metabolic disorders	61.14	72.05	8.51	0.7274	built_models/moldata/GraphConv/0924-1336/
activity_1496	cancer	64.48	81.15	1.01	0.8048	built_models/moldata/GraphConv/0921-2134/
activity_1496	Transcription factor	80.06	69.67	1.55	0.8105	built_models/moldata/GraphConv/1006-0649/
activity_1496	all_target	67.95	80.33	1.11	0.8218	built_models/moldata/GraphConv/1006-0146/
activity_1496	all_disease	72.24	77.87	1.24	0.8232	built_models/moldata/GraphConv/0921-2134/
activity_1509	Membrane receptor	75.09	31.76	0.4	0.5811	built_models/moldata/GraphConv/1006-0146/
activity_1509	virus	63.17	50.59	0.43	0.5788	built_models/moldata/GraphConv/0924-0334/
activity_1509	all_disease	74.76	30.59	0.38	0.5454	built_models/moldata/GraphConv/0921-2134/
activity_1509	all_target	64.71	47.06	0.41	0.5626	built_models/moldata/GraphConv/1006-0146/
activity_1510	all_target	59.99	77.33	0.53	0.7884	built_models/moldata/GraphConv/1006-0146/
activity_1510	Membrane receptor	54.17	82.67	0.49	0.774	built_models/moldata/GraphConv/1006-0146/
activity_1510	all_disease	56.44	85.33	0.53	0.8213	built_models/moldata/GraphConv/0921-2134/
activity_1510	virus	69.88	74.67	0.68	0.8134	built_models/moldata/GraphConv/0924-0334/
activity_1511	all_disease	63.6	57.87	0.93	0.6674	built_models/moldata/GraphConv/0921-2134/
activity_1511	all_target	52.05	65.17	0.8	0.6428	built_models/moldata/GraphConv/1006-0146/
activity_1511	cardiovascular	61.18	60.67	0.92	0.6516	built_models/moldata/GraphConv/0923-1718/
activity_1511	Ion channel	44.91	67.98	0.72	0.647	built_models/moldata/GraphConv/1006-0914/
activity_1515	all_target	82.1	37.5	0.43	0.6033	built_models/moldata/GraphConv/1006-0146/
activity_1515	cancer	65.83	46.43	0.28	0.5549	built_models/moldata/GraphConv/0921-2134/
activity_1515	all_disease	54.97	50	0.23	0.5498	built_models/moldata/GraphConv/0921-2134/
activity_1515	Hydrolase	73.17	35.71	0.27	0.567	built_models/moldata/GraphConv/1006-0419/
activity_1527	bacteria	88.06	46.36	4.35	0.7824	built_models/moldata/GraphConv/0924-1339/
activity_1527	Hydrolase	89.31	50.61	5.25	0.823	built_models/moldata/GraphConv/1006-0419/
activity_1527	all_disease	86.46	67.88	5.41	0.8604	built_models/moldata/GraphConv/0921-2134/
activity_1527	all_target	86.68	54.85	4.54	0.8222	built_models/moldata/GraphConv/1006-0146/
activity_1529	immune system	48.85	61.09	1.92	0.5725	built_models/moldata/GraphConv/0923-1718/
activity_1529	Kinase	37.77	72.18	1.86	0.5772	built_models/moldata/GraphConv/1006-0645/
activity_1529	cardiovascular	55.96	54.6	2	0.573	built_models/moldata/GraphConv/0923-1718/
activity_1529	cancer	41.35	67.15	1.84	0.5628	built_models/moldata/GraphConv/0921-2134/
activity_1529	all_disease	59.1	54.39	2.15	0.5841	built_models/moldata/GraphConv/0921-2134/
activity_1529	all_target	53.13	59.21	2.03	0.5773	built_models/moldata/GraphConv/1006-0146/
activity_1530	all_disease	93.36	45.61	2.67	0.818	built_models/moldata/GraphConv/0921-2134/
activity_1530	cancer	97.34	24.56	3.85	0.794	built_models/moldata/GraphConv/0921-2134/
activity_1530	all_target	95.54	31.58	2.83	0.8102	built_models/moldata/GraphConv/1006-0146/
activity_1530	immune system	98.11	21.05	4.88	0.8128	built_models/moldata/GraphConv/0923-1718/
activity_1530	Kinase	94.4	35.09	2.47	0.7623	built_models/moldata/GraphConv/1006-0645/
activity_1530	cardiovascular	96.76	27.19	3.43	0.821	built_models/moldata/GraphConv/0923-1718/
activity_1531	immune system	66.69	66.89	2.94	0.716	built_models/moldata/GraphConv/0923-1718/
activity_1531	cancer	59.41	70.78	2.55	0.7115	built_models/moldata/GraphConv/0921-2134/
activity_1531	all_target	65.04	66.89	2.8	0.7162	built_models/moldata/GraphConv/1006-0146/
activity_1531	all_disease	61.88	71	2.72	0.7305	built_models/moldata/GraphConv/0921-2134/
activity_1531	Kinase	52.47	77.63	2.39	0.7282	built_models/moldata/GraphConv/1006-0645/
activity_1531	cardiovascular	65.8	63.47	2.73	0.71	built_models/moldata/GraphConv/0923-1718/
activity_1554	cancer	81.97	77.65	1.21	0.8603	built_models/moldata/GraphConv/0921-2134/
activity_1554	all_disease	78.55	78.82	1.03	0.8697	built_models/moldata/GraphConv/0921-2134/
activity_1556	bacteria	34.51	81.55	0.7	0.6791	built_models/moldata/GraphConv/0924-1339/
activity_1556	Hydrolase	26.8	90.48	0.7	0.7138	built_models/moldata/GraphConv/1006-0419/
activity_1556	all_disease	46.5	78.57	0.83	0.7112	built_models/moldata/GraphConv/0921-2134/
activity_1556	all_target	49.65	75	0.84	0.6983	built_models/moldata/GraphConv/1006-0146/
activity_1631	Enzyme (other)	65.22	79.19	1.17	0.794	built_models/moldata/GraphConv/1006-0146/
activity_1631	all_disease	61.61	88.59	1.18	0.8477	built_models/moldata/GraphConv/0921-2134/
activity_1631	all_target	69.23	81.88	1.36	0.814	built_models/moldata/GraphConv/1006-0146/
activity_1631	metabolic disorders	69.14	76.51	1.27	0.7967	built_models/moldata/GraphConv/0924-1336/
activity_1634	all_target	75.82	78.95	0.21	0.8561	built_models/moldata/GraphConv/1006-0146/
activity_1634	all_disease	86.3	68.42	0.32	0.8711	built_models/moldata/GraphConv/0921-2134/
activity_1634	Enzyme (other)	81.98	68.42	0.25	0.8335	built_models/moldata/GraphConv/1006-0146/
activity_1634	metabolic disorders	83.47	63.16	0.25	0.8194	built_models/moldata/GraphConv/0924-1336/
activity_1656	diabetes	60.65	72.41	0.72	0.7137	built_models/moldata/GraphConv/0924-0334/
activity_1656	all_disease	75.86	71.26	1.15	0.7846	built_models/moldata/GraphConv/0921-2134/
activity_1656	immune system	67.57	66.67	0.8	0.7309	built_models/moldata/GraphConv/0923-1718/
activity_1656	cardiovascular	71.89	66.67	0.92	0.7291	built_models/moldata/GraphConv/0923-1718/
activity_1656	obesity	56.37	80.46	0.72	0.6991	built_models/moldata/GraphConv/0924-0333/
activity_1662	all_disease	70.43	88.49	4.82	0.8797	built_models/moldata/GraphConv/0921-2134/
activity_1662	bacteria	75.34	75.79	5	0.8313	built_models/moldata/GraphConv/0924-1339/
activity_1662	all_target	66	86.11	4.11	0.843	built_models/moldata/GraphConv/1006-0146/
activity_1662	Kinase	63.01	78.37	3.47	0.7716	built_models/moldata/GraphConv/1006-0645/
activity_1672	Ion channel	81.63	65.82	2.77	0.8262	built_models/moldata/GraphConv/1006-0914/
activity_1672	all_disease	83.1	70.89	3.22	0.8628	built_models/moldata/GraphConv/0921-2134/
activity_1672	nervous System	78.42	75.53	2.69	0.8579	built_models/moldata/GraphConv/0921-2135/
activity_1672	all_target	78.71	75.95	2.74	0.8468	built_models/moldata/GraphConv/1006-0146/
activity_1672	metabolic disorders	78.03	67.93	2.39	0.814	built_models/moldata/GraphConv/0924-1336/
activity_1688	nervous System	72.1	55.69	2.51	0.6914	built_models/moldata/GraphConv/0921-2135/
activity_1688	all_disease	86.14	44.62	4.1	0.7444	built_models/moldata/GraphConv/0921-2134/
activity_1700	all_target	77.37	61.19	0.61	0.7637	built_models/moldata/GraphConv/1006-0146/
activity_1700	all_disease	74.04	73.13	0.63	0.8188	built_models/moldata/GraphConv/0921-2134/
activity_1700	cancer	84.53	62.69	0.91	0.7927	built_models/moldata/GraphConv/0921-2134/
activity_1700	Transcription factor	69.25	68.66	0.5	0.7508	built_models/moldata/GraphConv/1006-0649/
activity_1706	virus	53.81	88.89	0.23	0.7806	built_models/moldata/GraphConv/0924-0334/
activity_1706	all_target	70.53	63.89	0.26	0.7297	built_models/moldata/GraphConv/1006-0146/
activity_1706	Enzyme (other)	66.86	61.11	0.22	0.708	built_models/moldata/GraphConv/1006-0146/
activity_1706	all_disease	68.23	75	0.29	0.7986	built_models/moldata/GraphConv/0921-2134/
activity_1768	cancer	87.37	44.87	1.07	0.8122	built_models/moldata/GraphConv/0921-2134/
activity_1768	all_disease	90.55	46.15	1.47	0.8126	built_models/moldata/GraphConv/0921-2134/
activity_1768	Epigenetic regulator	92.27	37.18	1.45	0.7754	built_models/moldata/GraphConv/1006-0641/
activity_1768	all_target	87.92	53.85	1.33	0.8312	built_models/moldata/GraphConv/1006-0146/
activity_1789	immune system	82.86	54.11	3.09	0.7516	built_models/moldata/GraphConv/0923-1718/
activity_1789	cancer	84.88	54.79	3.54	0.7552	built_models/moldata/GraphConv/0921-2134/
activity_1789	all_disease	87.23	50	3.85	0.7517	built_models/moldata/GraphConv/0921-2134/
activity_1789	nervous System	86.42	51.71	3.74	0.7706	built_models/moldata/GraphConv/0921-2135/
activity_1789	virus	81.5	50.34	2.68	0.7287	built_models/moldata/GraphConv/0924-0334/
activity_1800	virus	60.96	82.94	1.49	0.7989	built_models/moldata/GraphConv/0924-0334/
activity_1800	all_disease	71.01	78.2	1.89	0.8186	built_models/moldata/GraphConv/0921-2134/
activity_1813	nervous System	61.98	81.27	2.32	0.8017	built_models/moldata/GraphConv/0921-2135/
activity_1813	all_disease	64.88	83.69	2.57	0.8383	built_models/moldata/GraphConv/0921-2134/
activity_1814	nervous System	75.39	76.03	18.42	0.8298	built_models/moldata/GraphConv/0921-2135/
activity_1814	all_disease	76.56	78.22	19.56	0.8488	built_models/moldata/GraphConv/0921-2134/
activity_1822	all_target	62.59	86.27	2.93	0.8295	built_models/moldata/GraphConv/1006-0146/
activity_1822	Enzyme (other)	51	90.16	2.34	0.8226	built_models/moldata/GraphConv/1006-0146/
activity_1822	all_disease	58.81	88.34	2.72	0.8362	built_models/moldata/GraphConv/0921-2134/
activity_1822	immune system	54.36	87.56	2.44	0.8087	built_models/moldata/GraphConv/0923-1718/
activity_1822	cardiovascular	52.81	87.31	2.36	0.8036	built_models/moldata/GraphConv/0923-1718/
activity_1822	parasite	48.66	89.12	2.21	0.8074	built_models/moldata/GraphConv/0924-1340/
activity_1825	all_disease	74.24	68.07	2.09	0.8013	built_models/moldata/GraphConv/0921-2134/
activity_1825	cancer	80.27	63.45	2.55	0.7923	built_models/moldata/GraphConv/0921-2134/
activity_1845	all_disease	81.29	84	0.75	0.9078	built_models/moldata/GraphConv/0921-2134/
activity_1845	virus	88.81	76	1.13	0.9009	built_models/moldata/GraphConv/0924-0334/
activity_1861	all_target	69.03	57.59	2.17	0.6774	built_models/moldata/GraphConv/1006-0146/
activity_1861	nervous System	66.67	60.46	2.12	0.6844	built_models/moldata/GraphConv/0921-2135/
activity_1861	Membrane receptor	59.84	62.18	1.81	0.6554	built_models/moldata/GraphConv/1006-0146/
activity_1861	all_disease	77.52	46.99	2.47	0.6964	built_models/moldata/GraphConv/0921-2134/
activity_1868	all_disease	97.37	0	0	0.6248	built_models/moldata/GraphConv/0921-2134/
activity_1868	all_target	98	0	0	0.7509	built_models/moldata/GraphConv/1006-0146/
activity_1868	Transferase	96.17	40	0.18	0.6297	built_models/moldata/GraphConv/1006-0910/
activity_1868	epigenetics_genetics	91.25	40	0.08	0.7134	built_models/moldata/GraphConv/0924-2345/
activity_1868	metabolic disorders	93.08	20	0.05	0.6936	built_models/moldata/GraphConv/0924-1336/
activity_1885	parasite	82.16	54.78	5.96	0.7848	built_models/moldata/GraphConv/0924-1340/
activity_1885	all_disease	77.65	73.38	6.18	0.8366	built_models/moldata/GraphConv/0921-2134/
activity_1899	Enzyme (other)	64.36	78.63	1.68	0.7938	built_models/moldata/GraphConv/1006-0146/
activity_1899	virus	74.13	73.5	2.16	0.8037	built_models/moldata/GraphConv/0924-0334/
activity_1899	cancer	75.5	77.78	2.4	0.8399	built_models/moldata/GraphConv/0921-2134/
activity_1899	all_target	72.77	79.06	2.2	0.8476	built_models/moldata/GraphConv/1006-0146/
activity_1899	all_disease	71.43	83.33	2.21	0.8494	built_models/moldata/GraphConv/0921-2134/
activity_1906	immune system	73.31	48.94	1.14	0.6553	built_models/moldata/GraphConv/0923-1718/
activity_1906	parasite	58.1	64.89	0.95	0.6624	built_models/moldata/GraphConv/0924-1340/
activity_1906	Protease	68.02	54.26	1.05	0.6448	built_models/moldata/GraphConv/1006-0416/
activity_1906	all_disease	81.97	41.49	1.43	0.6627	built_models/moldata/GraphConv/0921-2134/
activity_1906	cardiovascular	64.7	58.51	1.02	0.66	built_models/moldata/GraphConv/0923-1718/
activity_1906	all_target	80.38	46.81	1.48	0.6666	built_models/moldata/GraphConv/1006-0146/
activity_1910	cardiovascular	58.21	63.87	0.61	0.6935	built_models/moldata/GraphConv/0923-1718/
activity_1910	nervous System	35.06	84.87	0.52	0.727	built_models/moldata/GraphConv/0921-2135/
activity_1910	all_disease	39.43	82.35	0.55	0.7488	built_models/moldata/GraphConv/0921-2134/
activity_1947	all_disease	78.06	88.57	1.83	0.9072	built_models/moldata/GraphConv/0921-2134/
activity_1947	cancer	77.03	85	1.68	0.8953	built_models/moldata/GraphConv/0921-2134/
activity_1947	all_target	74.51	85.71	1.53	0.8958	built_models/moldata/GraphConv/1006-0146/
activity_1947	Hydrolase	62.51	92.86	1.13	0.8797	built_models/moldata/GraphConv/1006-0419/
activity_1948	all_disease	93.99	0	0	0.0974	built_models/moldata/GraphConv/0921-2134/
activity_1948	epigenetics_genetics	81.3	33.33	0.04	0.3629	built_models/moldata/GraphConv/0924-2345/
activity_1950	nervous System	72.99	56.49	0.9	0.6816	built_models/moldata/GraphConv/0921-2135/
activity_1950	all_disease	62.18	70.23	0.8	0.7362	built_models/moldata/GraphConv/0921-2134/
activity_1950	immune system	75.99	54.2	0.97	0.6991	built_models/moldata/GraphConv/0923-1718/
activity_1950	virus	73.21	61.83	0.99	0.7249	built_models/moldata/GraphConv/0924-0334/
activity_1950	cancer	65.59	67.18	0.84	0.7056	built_models/moldata/GraphConv/0921-2134/
activity_1950	infection	69.64	61.07	0.87	0.7035	built_models/moldata/GraphConv/0924-2348/
activity_1962	all_disease	84.53	74.07	5.74	0.8633	built_models/moldata/GraphConv/0921-2134/
activity_1962	fungal	80.24	78.57	4.78	0.8579	built_models/moldata/GraphConv/0925-0953/
activity_1962	all_target	82.27	74.87	5.08	0.8592	built_models/moldata/GraphConv/1006-0146/
activity_1962	Enzyme (other)	69.74	83.6	3.35	0.8547	built_models/moldata/GraphConv/1006-0146/
activity_1974	cancer	53.78	87.29	2.16	0.8303	built_models/moldata/GraphConv/0921-2134/
activity_1974	all_target	65.49	86.16	2.84	0.8503	built_models/moldata/GraphConv/1006-0146/
activity_1974	all_disease	63.21	86.72	2.69	0.8467	built_models/moldata/GraphConv/0921-2134/
activity_1974	Enzyme (other)	52.27	89.55	2.15	0.8287	built_models/moldata/GraphConv/1006-0146/
activity_1979	all_disease	67.21	70.86	1.28	0.7668	built_models/moldata/GraphConv/0921-2134/
activity_1979	fungal	57.74	70.29	0.99	0.7046	built_models/moldata/GraphConv/0925-0953/
activity_1987	cancer	76.44	60.87	0.57	0.7628	built_models/moldata/GraphConv/0921-2134/
activity_1987	all_disease	82.98	63.77	0.83	0.7817	built_models/moldata/GraphConv/0921-2134/
activity_1987	Phosphatase	68.64	62.32	0.44	0.7008	built_models/moldata/GraphConv/1006-1129/
activity_1987	all_target	82.07	57.97	0.72	0.7476	built_models/moldata/GraphConv/1006-0146/
activity_2016	all_target	74.12	37.43	0.86	0.5835	built_models/moldata/GraphConv/1006-0146/
activity_2016	all_disease	80.91	27.27	0.86	0.5785	built_models/moldata/GraphConv/0921-2134/
activity_2016	cancer	71.49	38.5	0.8	0.5773	built_models/moldata/GraphConv/0921-2134/
activity_2016	Transporter	78.23	22.99	0.64	0.513	built_models/moldata/GraphConv/1006-1140/
activity_2016	nervous System	77.71	31.55	0.85	0.5626	built_models/moldata/GraphConv/0921-2135/
activity_2023	nervous System	71.89	72	1.02	0.7951	built_models/moldata/GraphConv/0921-2135/
activity_2023	Protease	76.84	64	1.1	0.7238	built_models/moldata/GraphConv/1006-0416/
activity_2023	cancer	71.3	71.2	0.98	0.7823	built_models/moldata/GraphConv/0921-2134/
activity_2023	all_target	61.69	77.6	0.8	0.7741	built_models/moldata/GraphConv/1006-0146/
activity_2023	all_disease	67.16	79.2	0.96	0.7995	built_models/moldata/GraphConv/0921-2134/
activity_2025	nervous System	74.45	37.63	0.44	0.5913	built_models/moldata/GraphConv/0921-2135/
activity_2025	cancer	73.94	31.18	0.36	0.546	built_models/moldata/GraphConv/0921-2134/
activity_2025	all_disease	78.63	29.03	0.41	0.5196	built_models/moldata/GraphConv/0921-2134/
activity_2029	nervous System	66.47	58.33	0.14	0.6872	built_models/moldata/GraphConv/0921-2135/
activity_2029	Transferase	77.11	37.5	0.13	0.6471	built_models/moldata/GraphConv/1006-0910/
activity_2029	cancer	79.08	33.33	0.12	0.6748	built_models/moldata/GraphConv/0921-2134/
activity_2029	all_disease	74.46	58.33	0.18	0.7215	built_models/moldata/GraphConv/0921-2134/
activity_2029	all_target	76.48	33.33	0.11	0.6814	built_models/moldata/GraphConv/1006-0146/
activity_2052	all_target	24.28	80	0.07	0.5063	built_models/moldata/GraphConv/1006-0146/
activity_2052	immune system	22.14	70	0.06	0.4892	built_models/moldata/GraphConv/0923-1718/
activity_2052	Membrane receptor	11.68	90	0.06	0.5348	built_models/moldata/GraphConv/1006-0146/
activity_2052	all_disease	15.76	80	0.06	0.4815	built_models/moldata/GraphConv/0921-2134/
activity_2057	all_disease	49.96	89.26	1.84	0.8405	built_models/moldata/GraphConv/0921-2134/
activity_2057	cancer	47.33	91.1	1.79	0.8483	built_models/moldata/GraphConv/0921-2134/
activity_2066	all_disease	66.37	55.56	0.05	0.5034	built_models/moldata/GraphConv/0921-2134/
activity_2066	Transporter	29.07	66.67	0.03	0.6183	built_models/moldata/GraphConv/1006-1140/
activity_2066	cancer	59.95	33.33	0.02	0.384	built_models/moldata/GraphConv/0921-2134/
activity_2066	nervous System	55.1	33.33	0.02	0.4077	built_models/moldata/GraphConv/0921-2135/
activity_2066	all_target	55.15	33.33	0.02	0.386	built_models/moldata/GraphConv/1006-0146/
activity_2071	all_disease	25.83	81.67	0.69	0.6104	built_models/moldata/GraphConv/0921-2134/
activity_2071	immune system	44.41	65.56	0.75	0.5762	built_models/moldata/GraphConv/0923-1718/
activity_2097	nervous System	86.65	60	0.15	0.8386	built_models/moldata/GraphConv/0921-2135/
activity_2097	Kinase	94.91	60	0.39	0.867	built_models/moldata/GraphConv/1006-0645/
activity_2097	all_target	92.1	40	0.17	0.8185	built_models/moldata/GraphConv/1006-0146/
activity_2097	all_disease	95.57	50	0.38	0.8814	built_models/moldata/GraphConv/0921-2134/
activity_2099	all_disease	42.63	62.86	0.12	0.5764	built_models/moldata/GraphConv/0921-2134/
activity_2099	cancer	64.94	45.71	0.15	0.5966	built_models/moldata/GraphConv/0921-2134/
activity_2100	all_target	72.85	74.49	0.93	0.8159	built_models/moldata/GraphConv/1006-0146/
activity_2100	all_disease	69.72	83.67	0.93	0.8419	built_models/moldata/GraphConv/0921-2134/
activity_2100	metabolic disorders	68.55	69.39	0.75	0.7671	built_models/moldata/GraphConv/0924-1336/
activity_2100	Hydrolase	78.13	70.41	1.09	0.8067	built_models/moldata/GraphConv/1006-0419/
activity_2100	epigenetics_genetics	83.7	61.22	1.27	0.7883	built_models/moldata/GraphConv/0924-2345/
activity_2100	cardiovascular	74.26	68.37	0.9	0.8015	built_models/moldata/GraphConv/0923-1718/
activity_2101	epigenetics_genetics	77.39	63.33	0.26	0.8164	built_models/moldata/GraphConv/0924-2345/
activity_2101	Enzyme (other)	67.96	76.67	0.22	0.8459	built_models/moldata/GraphConv/1006-0146/
activity_2101	all_disease	75.74	70	0.27	0.802	built_models/moldata/GraphConv/0921-2134/
activity_2101	all_target	75.89	63.33	0.25	0.7901	built_models/moldata/GraphConv/1006-0146/
activity_2107	Hydrolase	98.22	0	0	0.6301	built_models/moldata/GraphConv/1006-0419/
activity_2107	all_disease	94.78	0	0	0.8827	built_models/moldata/GraphConv/0921-2134/
activity_2107	metabolic disorders	99.09	0	0	0.3855	built_models/moldata/GraphConv/0924-1336/
activity_2107	all_target	97.87	0	0	0.9595	built_models/moldata/GraphConv/1006-0146/
activity_2107	epigenetics_genetics	98.37	0	0	0.092	built_models/moldata/GraphConv/0924-2345/
activity_2107	obesity	96.68	0	0	0.5166	built_models/moldata/GraphConv/0924-0333/
activity_2129	all_target	65.84	79.32	2.59	0.8085	built_models/moldata/GraphConv/1006-0146/
activity_2129	Ion channel	62.92	74.22	2.24	0.7529	built_models/moldata/GraphConv/1006-0914/
activity_2129	cancer	69.82	80.45	2.96	0.8286	built_models/moldata/GraphConv/0921-2134/
activity_2129	all_disease	61.84	85.55	2.5	0.8368	built_models/moldata/GraphConv/0921-2134/
activity_2130	all_target	76.85	70.11	1.68	0.8201	built_models/moldata/GraphConv/1006-0146/
activity_2130	cancer	72.78	75.29	1.53	0.817	built_models/moldata/GraphConv/0921-2134/
activity_2130	all_disease	72.79	78.74	1.6	0.8459	built_models/moldata/GraphConv/0921-2134/
activity_2130	Hydrolase	58.16	84.48	1.12	0.7977	built_models/moldata/GraphConv/1006-0419/
activity_2147	epigenetics_genetics	66.66	75.87	4.44	0.7773	built_models/moldata/GraphConv/0924-2345/
activity_2147	all_disease	63.77	82.21	4.4	0.8185	built_models/moldata/GraphConv/0921-2134/
activity_2147	Epigenetic regulator	65.28	77.3	4.34	0.7963	built_models/moldata/GraphConv/1006-0641/
activity_2147	all_target	72.21	78.94	5.48	0.8307	built_models/moldata/GraphConv/1006-0146/
activity_2156	nervous System	77.45	65.92	3.81	0.7934	built_models/moldata/GraphConv/0921-2135/
activity_2156	Ion channel	67.49	73.63	2.95	0.7747	built_models/moldata/GraphConv/1006-0914/
activity_2156	all_target	72.87	72.39	3.47	0.8032	built_models/moldata/GraphConv/1006-0146/
activity_2156	all_disease	75.01	76.12	3.94	0.8305	built_models/moldata/GraphConv/0921-2134/
activity_2156	cardiovascular	73.49	66.67	3.28	0.7736	built_models/moldata/GraphConv/0923-1718/
activity_2174	all_disease	57.38	83.33	0.41	0.7999	built_models/moldata/GraphConv/0921-2134/
activity_2174	all_target	55.43	80.3	0.38	0.7942	built_models/moldata/GraphConv/1006-0146/
activity_2174	cancer	50.65	86.36	0.37	0.7935	built_models/moldata/GraphConv/0921-2134/
activity_2174	Hydrolase	37.09	89.39	0.3	0.7673	built_models/moldata/GraphConv/1006-0419/
activity_2177	cancer	65.14	80.28	1.05	0.7944	built_models/moldata/GraphConv/0921-2134/
activity_2177	all_target	72.81	78.17	1.3	0.8171	built_models/moldata/GraphConv/1006-0146/
activity_2177	Hydrolase	53.74	83.1	0.82	0.779	built_models/moldata/GraphConv/1006-0419/
activity_2177	all_disease	65.82	80.99	1.08	0.8049	built_models/moldata/GraphConv/0921-2134/
activity_2221	all_disease	77.03	76.21	2.54	0.8589	built_models/moldata/GraphConv/0921-2134/
activity_2221	bacteria	60.65	79.74	1.56	0.7905	built_models/moldata/GraphConv/0924-1339/
activity_2221	Enzyme (other)	66.3	78.41	1.79	0.8067	built_models/moldata/GraphConv/1006-0146/
activity_2221	all_target	74.64	77.97	2.36	0.8446	built_models/moldata/GraphConv/1006-0146/
activity_2221	infection	74.41	75.77	2.28	0.8297	built_models/moldata/GraphConv/0924-2348/
activity_2227	nervous System	75.17	53.85	0.84	0.7151	built_models/moldata/GraphConv/0921-2135/
activity_2227	all_disease	80.21	48.72	0.95	0.6936	built_models/moldata/GraphConv/0921-2134/
activity_2227	cardiovascular	78.37	54.7	0.98	0.7123	built_models/moldata/GraphConv/0923-1718/
activity_2234	virus	74.95	64.52	0.51	0.7637	built_models/moldata/GraphConv/0924-0334/
activity_2234	all_disease	72.16	72.58	0.52	0.8062	built_models/moldata/GraphConv/0921-2134/
activity_2234	all_target	79.41	64.52	0.62	0.7708	built_models/moldata/GraphConv/1006-0146/
activity_2234	cancer	80.58	64.52	0.66	0.7954	built_models/moldata/GraphConv/0921-2134/
activity_2234	Transcription factor	83.79	45.16	0.56	0.7057	built_models/moldata/GraphConv/1006-0649/
activity_2235	all_target	69.77	83.49	3.76	0.8393	built_models/moldata/GraphConv/1006-0146/
activity_2235	all_disease	72.56	83.26	4.12	0.8522	built_models/moldata/GraphConv/0921-2134/
activity_2235	Phosphatase	56.17	86.24	2.7	0.8033	built_models/moldata/GraphConv/1006-1129/
activity_2235	cancer	68.39	80.73	3.49	0.8247	built_models/moldata/GraphConv/0921-2134/
activity_2237	all_disease	81.51	62.43	2.09	0.8111	built_models/moldata/GraphConv/0921-2134/
activity_2237	cardiovascular	88.11	49.74	2.61	0.7985	built_models/moldata/GraphConv/0923-1718/
activity_2237	nervous System	73.98	70.9	1.68	0.8007	built_models/moldata/GraphConv/0921-2135/
activity_2239	all_target	69.16	73.77	1.43	0.7894	built_models/moldata/GraphConv/1006-0146/
activity_2239	nervous System	61.76	73.22	1.15	0.7526	built_models/moldata/GraphConv/0921-2135/
activity_2239	cardiovascular	72.42	66.12	1.44	0.7578	built_models/moldata/GraphConv/0923-1718/
activity_2239	all_disease	70.51	71.58	1.45	0.7822	built_models/moldata/GraphConv/0921-2134/
activity_2239	Ion channel	69.55	73.22	1.44	0.7633	built_models/moldata/GraphConv/1006-0914/
activity_2242	cardiovascular	80.73	89.74	1.55	0.9131	built_models/moldata/GraphConv/0923-1718/
activity_2242	metabolic disorders	84.31	88.46	1.87	0.9038	built_models/moldata/GraphConv/0924-1336/
activity_2242	all_disease	88.45	82.05	2.35	0.9291	built_models/moldata/GraphConv/0921-2134/
activity_2242	Hydrolase	88.45	76.92	2.21	0.9194	built_models/moldata/GraphConv/1006-0419/
activity_2242	epigenetics_genetics	91.58	76.92	3.01	0.9059	built_models/moldata/GraphConv/0924-2345/
activity_2242	all_target	82.81	89.74	1.73	0.9387	built_models/moldata/GraphConv/1006-0146/
activity_2247	nervous System	54.62	79.82	0.66	0.7288	built_models/moldata/GraphConv/0921-2135/
activity_2247	all_disease	63.12	73.68	0.75	0.7582	built_models/moldata/GraphConv/0921-2134/
activity_2247	cardiovascular	47.42	78.07	0.56	0.6738	built_models/moldata/GraphConv/0923-1718/
activity_2280	cancer	82.19	62.84	2.4	0.7925	built_models/moldata/GraphConv/0921-2134/
activity_2280	all_disease	83.7	66.51	2.76	0.7996	built_models/moldata/GraphConv/0921-2134/
activity_2300	nervous System	45.88	87.23	0.24	0.7969	built_models/moldata/GraphConv/0921-2135/
activity_2300	all_target	52.04	80.85	0.25	0.7816	built_models/moldata/GraphConv/1006-0146/
activity_2300	Nuclear receptor	43.05	85.11	0.23	0.8006	built_models/moldata/GraphConv/1006-0423/
activity_2300	all_disease	50.73	82.98	0.25	0.8035	built_models/moldata/GraphConv/0921-2134/
activity_2314	metabolic disorders	73.64	70.2	27.21	0.7905	built_models/moldata/GraphConv/0924-1336/
activity_2314	all_disease	70.91	78.54	26.43	0.8194	built_models/moldata/GraphConv/0921-2134/
activity_2314	immune system	72.11	72.42	26.33	0.7941	built_models/moldata/GraphConv/0923-1718/
activity_2314	all_target	68.75	79.53	25.08	0.8125	built_models/moldata/GraphConv/1006-0146/
activity_2314	infection	74.61	71.14	28.25	0.7966	built_models/moldata/GraphConv/0924-2348/
activity_2314	bacteria	69.81	74.52	24.98	0.7868	built_models/moldata/GraphConv/0924-1339/
activity_2314	Hydrolase	70	75.35	25.25	0.7952	built_models/moldata/GraphConv/1006-0419/
activity_2314	cardiovascular	70.84	73.61	25.56	0.7909	built_models/moldata/GraphConv/0923-1718/
activity_2315	immune system	69.49	77.02	19.15	0.8052	built_models/moldata/GraphConv/0923-1718/
activity_2315	nervous System	69.72	77.17	19.3	0.8082	built_models/moldata/GraphConv/0921-2135/
activity_2315	all_disease	69.06	81.89	19.64	0.8306	built_models/moldata/GraphConv/0921-2134/
activity_2315	bacteria	68.79	76.35	18.67	0.7975	built_models/moldata/GraphConv/0924-1339/
activity_2315	infection	74.59	72.55	21.65	0.8093	built_models/moldata/GraphConv/0924-2348/
activity_2315	Hydrolase	71.03	75.6	19.8	0.8051	built_models/moldata/GraphConv/1006-0419/
activity_2315	metabolic disorders	74.53	71.25	21.39	0.803	built_models/moldata/GraphConv/0924-1336/
activity_2315	cardiovascular	70.08	77.17	19.5	0.8074	built_models/moldata/GraphConv/0923-1718/
activity_2315	all_target	66.48	82.48	18.43	0.8198	built_models/moldata/GraphConv/1006-0146/
activity_2326	immune system	40.59	85.47	0.95	0.7125	built_models/moldata/GraphConv/0923-1718/
activity_2326	all_disease	56.42	75.98	1.15	0.7233	built_models/moldata/GraphConv/0921-2134/
activity_2326	virus	43.81	74.86	0.88	0.6584	built_models/moldata/GraphConv/0924-0334/
activity_2380	diabetes	8.67	93.67	0.25	0.6026	built_models/moldata/GraphConv/0924-0334/
activity_2380	obesity	14.73	92.41	0.27	0.5898	built_models/moldata/GraphConv/0924-0333/
activity_2380	all_disease	27.38	87.34	0.3	0.6328	built_models/moldata/GraphConv/0921-2134/
activity_2380	immune system	23.45	87.34	0.28	0.5776	built_models/moldata/GraphConv/0923-1718/
activity_2417	all_disease	83.05	13.03	3.99	0.4971	built_models/moldata/GraphConv/0921-2134/
activity_2417	cancer	82.14	13.52	3.87	0.4887	built_models/moldata/GraphConv/0921-2134/
activity_2435	Membrane receptor	67.9	75.65	0.85	0.797	built_models/moldata/GraphConv/1006-0146/
activity_2435	all_target	80.75	61.74	1.16	0.8084	built_models/moldata/GraphConv/1006-0146/
activity_2435	nervous System	77.56	70.43	1.13	0.8176	built_models/moldata/GraphConv/0921-2135/
activity_2435	all_disease	83.99	53.04	1.2	0.7789	built_models/moldata/GraphConv/0921-2134/
activity_2445	Membrane receptor	45.44	72.22	0.07	0.6126	built_models/moldata/GraphConv/1006-0146/
activity_2445	nervous System	40.5	66.67	0.06	0.5277	built_models/moldata/GraphConv/0921-2135/
activity_2445	all_target	48.1	55.56	0.06	0.5488	built_models/moldata/GraphConv/1006-0146/
activity_2445	all_disease	38.8	66.67	0.06	0.6131	built_models/moldata/GraphConv/0921-2134/
activity_2451	Enzyme (other)	73.15	79.4	2.21	0.8563	built_models/moldata/GraphConv/1006-0146/
activity_2451	all_target	67.51	90.13	2.06	0.8869	built_models/moldata/GraphConv/1006-0146/
activity_2451	virus	79.39	75.97	2.74	0.8714	built_models/moldata/GraphConv/0924-0334/
activity_2451	all_disease	65.31	90.56	1.94	0.8911	built_models/moldata/GraphConv/0921-2134/
activity_2462	cancer	88.16	44.83	0.35	0.8035	built_models/moldata/GraphConv/0921-2134/
activity_2462	all_disease	86.35	58.62	0.4	0.8544	built_models/moldata/GraphConv/0921-2134/
activity_2472	all_disease	77.59	77.89	3.19	0.8489	built_models/moldata/GraphConv/0921-2134/
activity_2472	virus	80.48	74.26	3.49	0.8476	built_models/moldata/GraphConv/0924-0334/
activity_2472	Oxidoreductase	78.79	67.99	2.96	0.799	built_models/moldata/GraphConv/1006-0906/
activity_2472	all_target	75.64	82.51	3.1	0.8643	built_models/moldata/GraphConv/1006-0146/
activity_2517	cancer	66.4	84.16	1.49	0.8511	built_models/moldata/GraphConv/0921-2134/
activity_2517	all_disease	67.61	87.13	1.59	0.862	built_models/moldata/GraphConv/0921-2134/
activity_2517	Enzyme (other)	76.39	77.23	1.94	0.8533	built_models/moldata/GraphConv/1006-0146/
activity_2517	all_target	69.5	84.65	1.65	0.8633	built_models/moldata/GraphConv/1006-0146/
activity_2520	cardiovascular	78.89	47.92	0.34	0.7117	built_models/moldata/GraphConv/0923-1718/
activity_2520	metabolic disorders	85.09	41.67	0.42	0.7272	built_models/moldata/GraphConv/0924-1336/
activity_2520	Membrane receptor	76.6	52.08	0.34	0.7029	built_models/moldata/GraphConv/1006-0146/
activity_2520	all_target	86.56	37.5	0.42	0.7392	built_models/moldata/GraphConv/1006-0146/
activity_2520	all_disease	80.42	43.75	0.34	0.7218	built_models/moldata/GraphConv/0921-2134/
activity_2521	metabolic disorders	80.22	56.41	1.04	0.7494	built_models/moldata/GraphConv/0924-1336/
activity_2521	cardiovascular	79.83	55.56	1.01	0.7215	built_models/moldata/GraphConv/0923-1718/
activity_2521	all_target	80.62	57.26	1.08	0.7747	built_models/moldata/GraphConv/1006-0146/
activity_2521	all_disease	81.19	59.83	1.16	0.7746	built_models/moldata/GraphConv/0921-2134/
activity_2521	Membrane receptor	78.78	58.97	1.02	0.7261	built_models/moldata/GraphConv/1006-0146/
activity_2528	cancer	72.7	86.15	1.24	0.9022	built_models/moldata/GraphConv/0921-2134/
activity_2528	all_disease	72.56	88.46	1.27	0.9042	built_models/moldata/GraphConv/0921-2134/
activity_2528	Enzyme (other)	70.64	88.46	1.18	0.8748	built_models/moldata/GraphConv/1006-0146/
activity_2528	all_target	75.28	80.77	1.29	0.8782	built_models/moldata/GraphConv/1006-0146/
activity_2546	Nuclear receptor	83.95	59.17	14.73	0.8043	built_models/moldata/GraphConv/1006-0423/
activity_2546	all_target	78.41	70.54	12.67	0.8252	built_models/moldata/GraphConv/1006-0146/
activity_2546	immune system	78.49	68.78	12.47	0.8164	built_models/moldata/GraphConv/0923-1718/
activity_2546	all_disease	83.87	66.37	15.88	0.8402	built_models/moldata/GraphConv/0921-2134/
activity_2549	all_target	72.17	81.9	2.22	0.8495	built_models/moldata/GraphConv/1006-0146/
activity_2549	cancer	64.54	86.64	1.85	0.8517	built_models/moldata/GraphConv/0921-2134/
activity_2549	all_disease	71.72	81.03	2.17	0.8555	built_models/moldata/GraphConv/0921-2134/
activity_2549	Enzyme (other)	46.92	91.81	1.31	0.84	built_models/moldata/GraphConv/1006-0146/
activity_2550	all_disease	94.21	50	1.6	0.8031	built_models/moldata/GraphConv/0921-2134/
activity_2550	Ion channel	92.88	16.07	0.43	0.7128	built_models/moldata/GraphConv/1006-0914/
activity_2550	all_target	95.32	32.14	1.29	0.7947	built_models/moldata/GraphConv/1006-0146/
activity_2550	cardiovascular	89.41	35.71	0.63	0.7393	built_models/moldata/GraphConv/0923-1718/
activity_2551	immune system	78.27	74.91	19.66	0.844	built_models/moldata/GraphConv/0923-1718/
activity_2551	all_target	78.62	76.81	20.24	0.8559	built_models/moldata/GraphConv/1006-0146/
activity_2551	all_disease	80.91	74.7	21.95	0.8631	built_models/moldata/GraphConv/0921-2134/
activity_2551	Nuclear receptor	79.4	71.96	20.1	0.8391	built_models/moldata/GraphConv/1006-0423/
activity_2553	Ion channel	76.49	57.3	2.9	0.7287	built_models/moldata/GraphConv/1006-0914/
activity_2553	all_target	80.78	59.5	3.67	0.7614	built_models/moldata/GraphConv/1006-0146/
activity_2553	cardiovascular	74.29	66.94	3.07	0.7579	built_models/moldata/GraphConv/0923-1718/
activity_2553	all_disease	77.43	65.29	3.41	0.7808	built_models/moldata/GraphConv/0921-2134/
activity_2557	immune system	70.42	34.85	0.25	0.5318	built_models/moldata/GraphConv/0923-1718/
activity_2557	cancer	57.81	48.48	0.24	0.553	built_models/moldata/GraphConv/0921-2134/
activity_2557	all_disease	71.91	28.79	0.21	0.5229	built_models/moldata/GraphConv/0921-2134/
activity_2557	Membrane receptor	74.36	34.85	0.28	0.5822	built_models/moldata/GraphConv/1006-0146/
activity_2557	all_target	65.99	36.36	0.22	0.5112	built_models/moldata/GraphConv/1006-0146/
activity_2606	bacteria	87.71	51.85	0.36	0.7941	built_models/moldata/GraphConv/0924-1339/
activity_2606	all_target	85.73	66.67	0.4	0.8413	built_models/moldata/GraphConv/1006-0146/
activity_2606	all_disease	80.03	77.78	0.33	0.8401	built_models/moldata/GraphConv/0921-2134/
activity_2606	Protease	87.03	40.74	0.27	0.7643	built_models/moldata/GraphConv/1006-0416/
activity_2642	Ion channel	77.1	69.59	4.35	0.8064	built_models/moldata/GraphConv/1006-0914/
activity_2642	cardiovascular	65.88	83.78	3.5	0.8241	built_models/moldata/GraphConv/0923-1718/
activity_2642	immune system	68.38	81.08	3.66	0.815	built_models/moldata/GraphConv/0923-1718/
activity_2642	obesity	69.67	79.73	3.75	0.8187	built_models/moldata/GraphConv/0924-0333/
activity_2642	all_target	76.14	73.65	4.4	0.8331	built_models/moldata/GraphConv/1006-0146/
activity_2642	all_disease	71.52	82.88	4.13	0.8383	built_models/moldata/GraphConv/0921-2134/
activity_2642	diabetes	63.1	83.78	3.24	0.8056	built_models/moldata/GraphConv/0924-0334/
activity_2648	immune system	87.91	68.03	2.24	0.8637	built_models/moldata/GraphConv/0923-1718/
activity_2648	obesity	85.7	71.31	1.99	0.8642	built_models/moldata/GraphConv/0924-0333/
activity_2648	diabetes	79.2	76.23	1.46	0.8357	built_models/moldata/GraphConv/0924-0334/
activity_2648	Ion channel	88.31	66.39	2.26	0.8569	built_models/moldata/GraphConv/1006-0914/
activity_2648	cardiovascular	85.75	73.77	2.06	0.8625	built_models/moldata/GraphConv/0923-1718/
activity_2648	all_target	77.59	73.77	1.32	0.8579	built_models/moldata/GraphConv/1006-0146/
activity_2648	all_disease	82.8	74.59	1.73	0.8619	built_models/moldata/GraphConv/0921-2134/
activity_2648	nervous System	82.31	68.03	1.54	0.8352	built_models/moldata/GraphConv/0921-2135/
activity_2650	cancer	84.26	63.16	0.5	0.8185	built_models/moldata/GraphConv/0921-2134/
activity_2650	all_target	85.84	57.89	0.51	0.7864	built_models/moldata/GraphConv/1006-0146/
activity_2650	Kinase	72.3	68.42	0.31	0.7692	built_models/moldata/GraphConv/1006-0645/
activity_2650	all_disease	81.42	68.42	0.46	0.807	built_models/moldata/GraphConv/0921-2134/
activity_2661	all_target	72.96	77.78	0.25	0.8374	built_models/moldata/GraphConv/1006-0146/
activity_2661	all_disease	74.46	77.78	0.26	0.849	built_models/moldata/GraphConv/0921-2134/
activity_2661	metabolic disorders	78.11	66.67	0.26	0.823	built_models/moldata/GraphConv/0924-1336/
activity_2661	Kinase	68.26	81.48	0.22	0.8277	built_models/moldata/GraphConv/1006-0645/
activity_2662	cancer	92.35	75	0.53	0.905	built_models/moldata/GraphConv/0921-2134/
activity_2662	all_target	85.41	75	0.28	0.9024	built_models/moldata/GraphConv/1006-0146/
activity_2662	Epigenetic regulator	88.61	75	0.35	0.9034	built_models/moldata/GraphConv/1006-0641/
activity_2662	all_disease	87.42	68.75	0.29	0.9012	built_models/moldata/GraphConv/0921-2134/
activity_2675	immune system	62.6	66.67	0.13	0.6973	built_models/moldata/GraphConv/0923-1718/
activity_2675	all_disease	71.25	61.11	0.15	0.6724	built_models/moldata/GraphConv/0921-2134/
activity_2675	cardiovascular	62.09	50	0.09	0.6537	built_models/moldata/GraphConv/0923-1718/
activity_2675	diabetes	64.56	66.67	0.13	0.6497	built_models/moldata/GraphConv/0924-0334/
activity_2676	nervous System	52.81	93.51	0.49	0.8285	built_models/moldata/GraphConv/0921-2135/
activity_2676	cardiovascular	47.1	96.1	0.45	0.8492	built_models/moldata/GraphConv/0923-1718/
activity_2676	all_target	60.56	87.01	0.54	0.8353	built_models/moldata/GraphConv/1006-0146/
activity_2676	immune system	56.77	88.31	0.5	0.8356	built_models/moldata/GraphConv/0923-1718/
activity_2676	pulmonary	49.66	93.51	0.46	0.8496	built_models/moldata/GraphConv/0924-2348/
activity_2676	Membrane receptor	56.54	84.42	0.48	0.7867	built_models/moldata/GraphConv/1006-0146/
activity_2676	all_disease	56.14	94.81	0.53	0.8566	built_models/moldata/GraphConv/0921-2134/
activity_2685	immune system	12.18	93.42	1.08	0.5803	built_models/moldata/GraphConv/0923-1718/
activity_2685	all_disease	14.45	90.13	1.07	0.566	built_models/moldata/GraphConv/0921-2134/
activity_2685	diabetes	11.21	92.11	1.05	0.5688	built_models/moldata/GraphConv/0924-0334/
activity_2690	all_disease	66.6	68.89	0.29	0.7056	built_models/moldata/GraphConv/0921-2134/
activity_2690	cardiovascular	70.19	53.33	0.25	0.6797	built_models/moldata/GraphConv/0923-1718/
activity_2690	nervous System	74.41	53.33	0.29	0.6745	built_models/moldata/GraphConv/0921-2135/
activity_2690	cancer	72.76	57.78	0.3	0.7199	built_models/moldata/GraphConv/0921-2134/
activity_2716	all_disease	94.22	5.2	1.23	0.4971	built_models/moldata/GraphConv/0921-2134/
activity_2716	cancer	95.56	4.62	1.52	0.5173	built_models/moldata/GraphConv/0921-2134/
activity_2717	cancer	73.78	82.82	4.4	0.8571	built_models/moldata/GraphConv/0921-2134/
activity_2717	all_disease	83.54	72.24	6.09	0.8719	built_models/moldata/GraphConv/0921-2134/
activity_2718	all_target	83.91	47.06	0.49	0.7904	built_models/moldata/GraphConv/1006-0146/
activity_2718	all_disease	78.98	66.67	0.53	0.8137	built_models/moldata/GraphConv/0921-2134/
activity_2718	Epigenetic regulator	75.53	58.82	0.4	0.7683	built_models/moldata/GraphConv/1006-0641/
activity_2718	cancer	69.78	70.59	0.39	0.7467	built_models/moldata/GraphConv/0921-2134/
activity_2732	diabetes	85.62	36.75	9.72	0.7303	built_models/moldata/GraphConv/0924-0334/
activity_2732	all_target	82.83	47.8	9.99	0.7686	built_models/moldata/GraphConv/1006-0146/
activity_2732	nervous System	86.45	38.08	10.66	0.7631	built_models/moldata/GraphConv/0921-2135/
activity_2732	immune system	85.48	37.97	9.88	0.7514	built_models/moldata/GraphConv/0923-1718/
activity_2732	Transcription factor	89.73	24.56	10.32	0.7315	built_models/moldata/GraphConv/1006-0649/
activity_2732	all_disease	87.64	41.56	12.56	0.7996	built_models/moldata/GraphConv/0921-2134/
activity_2732	obesity	84.84	36.23	9.09	0.7391	built_models/moldata/GraphConv/0924-0333/
activity_2751	all_target	46.95	94.12	1.77	0.8349	built_models/moldata/GraphConv/1006-0146/
activity_2751	Enzyme (other)	43.59	95.67	1.7	0.8384	built_models/moldata/GraphConv/1006-0146/
activity_2751	all_disease	60.98	89.16	2.28	0.8448	built_models/moldata/GraphConv/0921-2134/
activity_2751	epigenetics_genetics	39.87	95.67	1.59	0.7985	built_models/moldata/GraphConv/0924-2345/
activity_2796	cancer	81.93	71.13	10.01	0.8487	built_models/moldata/GraphConv/0921-2134/
activity_2796	metabolic disorders	78.49	73.81	8.75	0.8352	built_models/moldata/GraphConv/0924-1336/
activity_2796	Transcription factor	81.31	72.18	9.81	0.8499	built_models/moldata/GraphConv/1006-0649/
activity_2796	all_disease	79.7	75.55	9.42	0.8538	built_models/moldata/GraphConv/0921-2134/
activity_2796	all_target	75.58	79.86	8.29	0.8486	built_models/moldata/GraphConv/1006-0146/
activity_2797	nervous System	79.42	72.16	1.06	0.8294	built_models/moldata/GraphConv/0921-2135/
activity_2797	all_disease	82.4	55.67	0.96	0.7823	built_models/moldata/GraphConv/0921-2134/
activity_2797	Membrane receptor	67.07	78.35	0.72	0.7994	built_models/moldata/GraphConv/1006-0146/
activity_2797	all_target	79.04	67.01	0.97	0.8091	built_models/moldata/GraphConv/1006-0146/
activity_2825	immune system	72.6	73.02	1.05	0.802	built_models/moldata/GraphConv/0923-1718/
activity_2825	all_disease	63.01	84.13	0.89	0.8245	built_models/moldata/GraphConv/0921-2134/
activity_422	nervous System	63.32	75.68	0.39	0.7692	built_models/moldata/GraphConv/0921-2135/
activity_422	all_disease	76.19	56.76	0.45	0.7533	built_models/moldata/GraphConv/0921-2134/
activity_422	cancer	63.73	78.38	0.41	0.769	built_models/moldata/GraphConv/0921-2134/
activity_434962	all_target	87.38	63.43	2.74	0.8282	built_models/moldata/GraphConv/1006-0146/
activity_434962	obesity	80.3	60	1.67	0.7957	built_models/moldata/GraphConv/0924-0333/
activity_434962	nervous System	85.39	58.86	2.2	0.8168	built_models/moldata/GraphConv/0921-2135/
activity_434962	all_disease	81.27	69.14	2.01	0.8187	built_models/moldata/GraphConv/0921-2134/
activity_434962	Enzyme (other)	73.7	69.71	1.45	0.7993	built_models/moldata/GraphConv/1006-0146/
activity_434962	immune system	81.74	62.29	1.86	0.812	built_models/moldata/GraphConv/0923-1718/
activity_434962	diabetes	80.08	61.14	1.68	0.7826	built_models/moldata/GraphConv/0924-0334/
activity_434989	all_disease	77.33	60.43	1.55	0.7702	built_models/moldata/GraphConv/0921-2134/
activity_434989	Membrane receptor	67.97	59.89	1.09	0.7181	built_models/moldata/GraphConv/1006-0146/
activity_434989	all_target	82.46	55.61	1.84	0.773	built_models/moldata/GraphConv/1006-0146/
activity_434989	nervous System	78.81	55.08	1.51	0.7627	built_models/moldata/GraphConv/0921-2135/
activity_435003	all_disease	80.54	62.56	2.11	0.7945	built_models/moldata/GraphConv/0921-2134/
activity_435003	cancer	80.86	58.77	2.02	0.7742	built_models/moldata/GraphConv/0921-2134/
activity_435003	immune system	85.68	52.13	2.41	0.7584	built_models/moldata/GraphConv/0923-1718/
activity_435005	obesity	73.55	68.52	2.78	0.7822	built_models/moldata/GraphConv/0924-0333/
activity_435005	immune system	75.89	71.91	3.19	0.8057	built_models/moldata/GraphConv/0923-1718/
activity_435005	all_disease	78.68	74.07	3.69	0.8485	built_models/moldata/GraphConv/0921-2134/
activity_435005	diabetes	60.16	77.47	2.09	0.762	built_models/moldata/GraphConv/0924-0334/
activity_435022	all_disease	87.86	31.82	1.09	0.6849	built_models/moldata/GraphConv/0921-2134/
activity_435022	immune system	87.49	26.52	0.88	0.661	built_models/moldata/GraphConv/0923-1718/
activity_435022	cancer	88.09	31.82	1.11	0.6937	built_models/moldata/GraphConv/0921-2134/
activity_435030	all_disease	77.74	80.17	1.35	0.8551	built_models/moldata/GraphConv/0921-2134/
activity_435030	immune system	80.7	68.6	1.33	0.8098	built_models/moldata/GraphConv/0923-1718/
activity_435030	all_target	85.2	67.77	1.71	0.8368	built_models/moldata/GraphConv/1006-0146/
activity_435030	cancer	75.82	81.82	1.27	0.8384	built_models/moldata/GraphConv/0921-2134/
activity_435030	NTPase	85.19	65.29	1.65	0.8133	built_models/moldata/GraphConv/1006-1136/
activity_435030	bacteria	78.53	74.38	1.3	0.8227	built_models/moldata/GraphConv/0924-1339/
activity_445	cancer	88.34	30.77	0.31	0.6684	built_models/moldata/GraphConv/0921-2134/
activity_445	all_disease	86.65	46.15	0.41	0.6826	built_models/moldata/GraphConv/0921-2134/
activity_449728	immune system	63.11	85.48	0.89	0.8324	built_models/moldata/GraphConv/0923-1718/
activity_449728	all_disease	70.81	83.87	1.1	0.8608	built_models/moldata/GraphConv/0921-2134/
activity_449728	cancer	67.83	83.87	1	0.8489	built_models/moldata/GraphConv/0921-2134/
activity_449728	bacteria	60.34	83.06	0.81	0.8194	built_models/moldata/GraphConv/0924-1339/
activity_449763	nervous System	80.09	59.49	1.46	0.7729	built_models/moldata/GraphConv/0921-2135/
activity_449763	obesity	77.43	56.33	1.22	0.7422	built_models/moldata/GraphConv/0924-0333/
activity_449763	all_disease	78.09	81.01	1.79	0.8826	built_models/moldata/GraphConv/0921-2134/
activity_449763	diabetes	79	55.7	1.3	0.7396	built_models/moldata/GraphConv/0924-0334/
activity_449763	immune system	80.2	61.39	1.52	0.7723	built_models/moldata/GraphConv/0923-1718/
activity_449763	epigenetics_genetics	77.59	52.53	1.15	0.7419	built_models/moldata/GraphConv/0924-2345/
activity_463079	nervous System	75.94	66.53	2.07	0.786	built_models/moldata/GraphConv/0921-2135/
activity_463079	all_disease	84.3	56.2	2.69	0.8019	built_models/moldata/GraphConv/0921-2134/
activity_463082	all_target	75.24	72.05	5.07	0.8124	built_models/moldata/GraphConv/1006-0146/
activity_463082	Hydrolase	59.72	83.16	3.61	0.7986	built_models/moldata/GraphConv/1006-0419/
activity_463082	cardiovascular	68.45	77.6	4.29	0.8043	built_models/moldata/GraphConv/0923-1718/
activity_463082	all_disease	68.55	81.25	4.48	0.8285	built_models/moldata/GraphConv/0921-2134/
activity_463104	immune system	83.1	65.77	1.79	0.8455	built_models/moldata/GraphConv/0923-1718/
activity_463104	diabetes	91.29	43.62	2.34	0.8309	built_models/moldata/GraphConv/0924-0334/
activity_463104	nervous System	88.68	56.38	2.3	0.8596	built_models/moldata/GraphConv/0921-2135/
activity_463104	obesity	87.04	59.73	2.12	0.8371	built_models/moldata/GraphConv/0924-0333/
activity_463104	all_disease	86.51	65.1	2.22	0.8765	built_models/moldata/GraphConv/0921-2134/
activity_463104	epigenetics_genetics	88.97	55.03	2.3	0.8347	built_models/moldata/GraphConv/0924-2345/
activity_463111	nervous System	79.31	57.68	3.39	0.7432	built_models/moldata/GraphConv/0921-2135/
activity_463111	cardiovascular	71.53	64.15	2.73	0.7516	built_models/moldata/GraphConv/0923-1718/
activity_463111	immune system	78.83	58.49	3.35	0.7416	built_models/moldata/GraphConv/0923-1718/
activity_463111	all_disease	73.89	68.73	3.17	0.7718	built_models/moldata/GraphConv/0921-2134/
activity_463141	all_target	61.54	74.07	0.16	0.7053	built_models/moldata/GraphConv/1006-0146/
activity_463141	cancer	70.69	40.74	0.12	0.6716	built_models/moldata/GraphConv/0921-2134/
activity_463141	all_disease	60.96	88.89	0.19	0.7685	built_models/moldata/GraphConv/0921-2134/
activity_463141	Protease	63.35	66.67	0.15	0.6918	built_models/moldata/GraphConv/1006-0416/
activity_463165	immune system	74.89	73.49	1.59	0.8386	built_models/moldata/GraphConv/0923-1718/
activity_463165	cardiovascular	72.23	79.52	1.55	0.8325	built_models/moldata/GraphConv/0923-1718/
activity_463165	all_disease	69.21	84.34	1.48	0.8461	built_models/moldata/GraphConv/0921-2134/
activity_463165	nervous System	75.49	74.7	1.65	0.8244	built_models/moldata/GraphConv/0921-2135/
activity_463190	all_disease	86.73	44.36	8.09	0.793	built_models/moldata/GraphConv/0921-2134/
activity_463190	nervous System	84.3	43.44	6.7	0.7694	built_models/moldata/GraphConv/0921-2135/
activity_463190	cancer	83.6	47.64	6.94	0.7738	built_models/moldata/GraphConv/0921-2134/
activity_463195	all_disease	77.24	68.48	4.86	0.812	built_models/moldata/GraphConv/0921-2134/
activity_463195	nervous System	74.03	69.04	4.31	0.8028	built_models/moldata/GraphConv/0921-2135/
activity_463195	cancer	75.76	69.61	4.64	0.8086	built_models/moldata/GraphConv/0921-2134/
activity_463210	all_target	74.4	51.61	0.2	0.7087	built_models/moldata/GraphConv/1006-0146/
activity_463210	cancer	82.71	51.61	0.29	0.7613	built_models/moldata/GraphConv/0921-2134/
activity_463210	all_disease	79.08	74.19	0.34	0.8302	built_models/moldata/GraphConv/0921-2134/
activity_463210	Protease	74.54	61.29	0.23	0.713	built_models/moldata/GraphConv/1006-0416/
activity_463212	all_disease	75.73	75.35	4.08	0.8332	built_models/moldata/GraphConv/0921-2134/
activity_463212	cancer	77.6	70.74	4.16	0.828	built_models/moldata/GraphConv/0921-2134/
activity_463212	nervous System	78.05	71.66	4.3	0.8315	built_models/moldata/GraphConv/0921-2135/
activity_463254	all_disease	76.36	100	0.11	0.9949	built_models/moldata/GraphConv/0921-2134/
activity_463254	cancer	78.54	100	0.12	0.986	built_models/moldata/GraphConv/0921-2134/
activity_463254	Protease	83.17	100	0.15	0.9674	built_models/moldata/GraphConv/1006-0416/
activity_463254	all_target	83.69	100	0.15	0.9927	built_models/moldata/GraphConv/1006-0146/
activity_485	all_target	32.57	68.83	0.35	0.4944	built_models/moldata/GraphConv/1006-0146/
activity_485	all_disease	29.42	75.32	0.37	0.5477	built_models/moldata/GraphConv/0921-2134/
activity_485	Membrane receptor	30.88	72.73	0.36	0.5131	built_models/moldata/GraphConv/1006-0146/
activity_485	cardiovascular	31.37	71.43	0.36	0.488	built_models/moldata/GraphConv/0923-1718/
activity_485270	all_disease	79.59	68.72	6.89	0.8237	built_models/moldata/GraphConv/0921-2134/
activity_485270	nervous System	80.33	67.99	7.07	0.8261	built_models/moldata/GraphConv/0921-2135/
activity_485270	Membrane receptor	64.63	79.44	4.61	0.7967	built_models/moldata/GraphConv/1006-0146/
activity_485270	all_target	80.75	63.14	6.78	0.8158	built_models/moldata/GraphConv/1006-0146/
activity_485272	all_target	63.4	82.5	1.12	0.8147	built_models/moldata/GraphConv/1006-0146/
activity_485272	Enzyme (other)	57.04	82.5	0.95	0.7871	built_models/moldata/GraphConv/1006-0146/
activity_485272	immune system	65.08	84.38	1.2	0.8221	built_models/moldata/GraphConv/0923-1718/
activity_485272	all_disease	63.47	84.38	1.14	0.8363	built_models/moldata/GraphConv/0921-2134/
activity_485273	Transferase	85.22	60.12	2.07	0.8062	built_models/moldata/GraphConv/1006-0910/
activity_485273	all_disease	75.89	80.98	1.7	0.8505	built_models/moldata/GraphConv/0921-2134/
activity_485273	immune system	63.55	77.3	1.08	0.7948	built_models/moldata/GraphConv/0923-1718/
activity_485273	all_target	67.47	77.3	1.21	0.7955	built_models/moldata/GraphConv/1006-0146/
activity_485273	infection	76.56	63.19	1.38	0.7988	built_models/moldata/GraphConv/0924-2348/
activity_485275	all_disease	78.77	35.88	0.9	0.6041	built_models/moldata/GraphConv/0921-2134/
activity_485275	fungal	68.71	50	0.85	0.622	built_models/moldata/GraphConv/0925-0953/
activity_485275	immune system	71.91	43.53	0.82	0.6074	built_models/moldata/GraphConv/0923-1718/
activity_485281	all_disease	84.49	72.5	0.64	0.8692	built_models/moldata/GraphConv/0921-2134/
activity_485281	nervous System	86.57	57.5	0.59	0.8337	built_models/moldata/GraphConv/0921-2135/
activity_485290	all_target	81.21	65.89	1.4	0.7819	built_models/moldata/GraphConv/1006-0146/
activity_485290	NTPase	83.03	61.24	1.44	0.7591	built_models/moldata/GraphConv/1006-1136/
activity_485290	cancer	85.51	56.59	1.56	0.7878	built_models/moldata/GraphConv/0921-2134/
activity_485290	all_disease	79.92	63.57	1.26	0.797	built_models/moldata/GraphConv/0921-2134/
activity_485297	metabolic disorders	82.03	76.26	11.02	0.876	built_models/moldata/GraphConv/0924-1336/
activity_485297	all_disease	76.55	87.43	9.62	0.9028	built_models/moldata/GraphConv/0921-2134/
activity_485297	all_target	80.96	82.37	11.1	0.8906	built_models/moldata/GraphConv/1006-0146/
activity_485297	Hydrolase	84.98	72.97	12.58	0.8769	built_models/moldata/GraphConv/1006-0419/
activity_485297	nervous System	84.28	73.8	12.16	0.8814	built_models/moldata/GraphConv/0921-2135/
activity_485298	cancer	66.83	79.49	0.6	0.7774	built_models/moldata/GraphConv/0921-2134/
activity_485298	all_disease	70.79	69.23	0.6	0.7677	built_models/moldata/GraphConv/0921-2134/
activity_485313	metabolic disorders	82.13	76.71	9.08	0.8725	built_models/moldata/GraphConv/0924-1336/
activity_485313	nervous System	85.31	73.22	10.51	0.8854	built_models/moldata/GraphConv/0921-2135/
activity_485313	Transporter	85.26	69	9.99	0.8599	built_models/moldata/GraphConv/1006-1140/
activity_485313	all_target	81.7	81.51	9.33	0.893	built_models/moldata/GraphConv/1006-0146/
activity_485313	all_disease	77.94	86.03	8.2	0.9043	built_models/moldata/GraphConv/0921-2134/
activity_485314	all_target	86.61	56.12	9.33	0.8178	built_models/moldata/GraphConv/1006-0146/
activity_485314	cancer	84.57	62.33	8.85	0.8266	built_models/moldata/GraphConv/0921-2134/
activity_485314	Enzyme (other)	83.48	62.02	8.25	0.8152	built_models/moldata/GraphConv/1006-0146/
activity_485314	all_disease	87.92	61.55	11.09	0.8442	built_models/moldata/GraphConv/0921-2134/
activity_485344	Membrane receptor	17.58	89.64	2.43	0.656	built_models/moldata/GraphConv/1006-0146/
activity_485344	all_disease	22.65	87.99	2.54	0.6748	built_models/moldata/GraphConv/0921-2134/
activity_485344	immune system	23.46	86.94	2.53	0.653	built_models/moldata/GraphConv/0923-1718/
activity_485344	all_target	24.75	86.04	2.55	0.661	built_models/moldata/GraphConv/1006-0146/
activity_485344	nervous System	22.93	86.19	2.5	0.6635	built_models/moldata/GraphConv/0921-2135/
activity_485346	all_disease	72.12	78.89	10.37	0.8339	built_models/moldata/GraphConv/0921-2134/
activity_485346	cancer	64.84	80.85	8.53	0.8073	built_models/moldata/GraphConv/0921-2134/
activity_485347	all_target	97.09	3.54	0.53	0.547	built_models/moldata/GraphConv/1006-0146/
activity_485347	nervous System	97.72	0.88	0.18	0.5352	built_models/moldata/GraphConv/0921-2135/
activity_485347	immune system	98.33	3.54	1.04	0.5649	built_models/moldata/GraphConv/0923-1718/
activity_485347	Membrane receptor	98.18	2.65	0.7	0.5485	built_models/moldata/GraphConv/1006-0146/
activity_485347	all_disease	96.89	0.88	0.12	0.527	built_models/moldata/GraphConv/0921-2134/
activity_485349	all_disease	74.02	49.23	0.4	0.6861	built_models/moldata/GraphConv/0921-2134/
activity_485349	nervous System	83.41	27.69	0.35	0.6698	built_models/moldata/GraphConv/0921-2135/
activity_485349	all_target	77.3	52.31	0.48	0.7186	built_models/moldata/GraphConv/1006-0146/
activity_485349	Kinase	79.46	38.46	0.39	0.6385	built_models/moldata/GraphConv/1006-0645/
activity_485353	Enzyme (other)	71.72	62.12	0.46	0.7202	built_models/moldata/GraphConv/1006-0146/
activity_485353	all_disease	72.33	63.64	0.48	0.7362	built_models/moldata/GraphConv/0921-2134/
activity_485353	virus	77.64	59.09	0.55	0.7278	built_models/moldata/GraphConv/0924-0334/
activity_485353	all_target	75.61	60.61	0.52	0.7569	built_models/moldata/GraphConv/1006-0146/
activity_485358	immune system	90.2	56.87	4.15	0.8105	built_models/moldata/GraphConv/0923-1718/
activity_485358	Membrane receptor	83.54	65.4	2.83	0.8114	built_models/moldata/GraphConv/1006-0146/
activity_485358	all_target	88.12	63.98	3.83	0.8341	built_models/moldata/GraphConv/1006-0146/
activity_485358	nervous System	89.27	57.82	3.85	0.8073	built_models/moldata/GraphConv/0921-2135/
activity_485358	all_disease	87.97	68.72	4.04	0.841	built_models/moldata/GraphConv/0921-2134/
activity_485360	cancer	50.94	87.7	1.84	0.8314	built_models/moldata/GraphConv/0921-2134/
activity_485360	all_disease	53.34	89.34	1.96	0.8488	built_models/moldata/GraphConv/0921-2134/
activity_485360	Epigenetic regulator	48.9	85.66	1.72	0.8119	built_models/moldata/GraphConv/1006-0641/
activity_485360	all_target	65.76	83.61	2.5	0.839	built_models/moldata/GraphConv/1006-0146/
activity_485364	all_target	82.25	67.07	16.77	0.8228	built_models/moldata/GraphConv/1006-0146/
activity_485364	parasite	75.19	70.61	12.78	0.794	built_models/moldata/GraphConv/0924-1340/
activity_485364	all_disease	80.25	71.18	15.84	0.8322	built_models/moldata/GraphConv/0921-2134/
activity_485364	Enzyme (other)	79.1	65.16	14.14	0.7935	built_models/moldata/GraphConv/1006-0146/
activity_485367	all_target	70.63	82.69	0.46	0.8532	built_models/moldata/GraphConv/1006-0146/
activity_485367	all_disease	68.56	90.38	0.47	0.8918	built_models/moldata/GraphConv/0921-2134/
activity_485367	Enzyme (other)	62.14	86.54	0.37	0.8436	built_models/moldata/GraphConv/1006-0146/
activity_485367	parasite	74.31	69.23	0.44	0.7987	built_models/moldata/GraphConv/0924-1340/
activity_485395	all_disease	79.77	90	0.29	0.9352	built_models/moldata/GraphConv/0921-2134/
activity_485395	Enzyme (other)	80.09	90	0.29	0.9078	built_models/moldata/GraphConv/1006-0146/
activity_485395	bacteria	81.76	90	0.32	0.8973	built_models/moldata/GraphConv/0924-1339/
activity_485395	all_target	76.04	90	0.24	0.9404	built_models/moldata/GraphConv/1006-0146/
activity_488837	Enzyme (other)	56.76	50	0.01	0.4532	built_models/moldata/GraphConv/1006-0146/
activity_488837	all_target	62.73	50	0.01	0.6601	built_models/moldata/GraphConv/1006-0146/
activity_488837	cancer	66.34	0	0	0.433	built_models/moldata/GraphConv/0921-2134/
activity_488837	all_disease	82.8	0	0	0.5786	built_models/moldata/GraphConv/0921-2134/
activity_488839	immune system	98.82	33.33	0.25	0.9214	built_models/moldata/GraphConv/0923-1718/
activity_488839	nervous System	91.19	66.67	0.07	0.8781	built_models/moldata/GraphConv/0921-2135/
activity_488839	all_target	95.23	66.67	0.13	0.8884	built_models/moldata/GraphConv/1006-0146/
activity_488839	Kinase	95.44	66.67	0.13	0.8713	built_models/moldata/GraphConv/1006-0645/
activity_488839	all_disease	95.24	66.67	0.13	0.9028	built_models/moldata/GraphConv/0921-2134/
activity_488847	all_disease	55.43	58.62	0.83	0.6127	built_models/moldata/GraphConv/0921-2134/
activity_488847	nervous System	66.1	37.44	0.7	0.5275	built_models/moldata/GraphConv/0921-2135/
activity_488847	cardiovascular	74.44	39.41	0.98	0.5751	built_models/moldata/GraphConv/0923-1718/
activity_488847	Kinase	55.33	49.26	0.7	0.5357	built_models/moldata/GraphConv/1006-0645/
activity_488847	all_target	62.24	46.8	0.79	0.5717	built_models/moldata/GraphConv/1006-0146/
activity_488895	all_disease	74.71	88.24	0.18	0.9165	built_models/moldata/GraphConv/0921-2134/
activity_488895	bacteria	53.03	100	0.11	0.9083	built_models/moldata/GraphConv/0924-1339/
activity_488896	Membrane receptor	87.51	61.92	4.6	0.838	built_models/moldata/GraphConv/1006-0146/
activity_488896	obesity	90.41	54.3	5.3	0.8466	built_models/moldata/GraphConv/0924-0333/
activity_488896	all_target	91.41	55.63	6.04	0.8581	built_models/moldata/GraphConv/1006-0146/
activity_488896	cardiovascular	86.25	65.23	4.39	0.8565	built_models/moldata/GraphConv/0923-1718/
activity_488896	all_disease	88.84	62.58	5.18	0.859	built_models/moldata/GraphConv/0921-2134/
activity_488899	all_target	81.3	75.7	5.48	0.859	built_models/moldata/GraphConv/1006-0146/
activity_488899	Transcription factor	76.05	75.91	4.33	0.8413	built_models/moldata/GraphConv/1006-0649/
activity_488899	all_disease	83.23	73.98	5.97	0.8754	built_models/moldata/GraphConv/0921-2134/
activity_488899	cancer	76.32	78.28	4.5	0.8666	built_models/moldata/GraphConv/0921-2134/
activity_488922	all_disease	91.63	46.76	7.78	0.8534	built_models/moldata/GraphConv/0921-2134/
activity_488922	nervous System	91.66	38.85	6.66	0.8355	built_models/moldata/GraphConv/0921-2135/
activity_488922	Ion channel	92.72	33.57	6.78	0.8087	built_models/moldata/GraphConv/1006-0914/
activity_488922	all_target	91.06	43.88	6.89	0.8367	built_models/moldata/GraphConv/1006-0146/
activity_488922	cancer	88.92	51.8	6.41	0.8327	built_models/moldata/GraphConv/0921-2134/
activity_488965	bacteria	94.45	33.33	0.32	0.7507	built_models/moldata/GraphConv/0924-1339/
activity_488965	Hydrolase	89.08	38.89	0.19	0.6888	built_models/moldata/GraphConv/1006-0419/
activity_488965	all_disease	82.32	50	0.15	0.7455	built_models/moldata/GraphConv/0921-2134/
activity_488965	all_target	88.79	44.44	0.21	0.7578	built_models/moldata/GraphConv/1006-0146/
activity_488975	Transporter	66.96	42.05	1.27	0.5784	built_models/moldata/GraphConv/1006-1140/
activity_488975	nervous System	71.76	40.73	1.44	0.6111	built_models/moldata/GraphConv/0921-2135/
activity_488975	all_disease	78.18	39.74	1.82	0.6472	built_models/moldata/GraphConv/0921-2134/
activity_488975	all_target	69.21	47.02	1.52	0.6171	built_models/moldata/GraphConv/1006-0146/
activity_488977	Transporter	84.74	42.22	2.06	0.7287	built_models/moldata/GraphConv/1006-1140/
activity_488977	nervous System	79.94	56.44	2.07	0.7678	built_models/moldata/GraphConv/0921-2135/
activity_488977	all_target	81.93	66.67	2.69	0.8264	built_models/moldata/GraphConv/1006-0146/
activity_488977	all_disease	80.39	64.89	2.42	0.8096	built_models/moldata/GraphConv/0921-2134/
activity_489030	all_disease	55.61	91.45	2.13	0.8569	built_models/moldata/GraphConv/0921-2134/
activity_489030	cancer	46.38	88.79	1.72	0.823	built_models/moldata/GraphConv/0921-2134/
activity_489030	immune system	44.15	91.15	1.7	0.8114	built_models/moldata/GraphConv/0923-1718/
activity_489030	nervous System	48.2	89.09	1.79	0.8222	built_models/moldata/GraphConv/0921-2135/
activity_489031	immune system	24.96	73.81	0.26	0.4967	built_models/moldata/GraphConv/0923-1718/
activity_489031	nervous System	40.69	66.67	0.29	0.5481	built_models/moldata/GraphConv/0921-2135/
activity_489031	all_disease	44.85	59.52	0.28	0.517	built_models/moldata/GraphConv/0921-2134/
activity_489031	cancer	55.62	45.24	0.27	0.528	built_models/moldata/GraphConv/0921-2134/
activity_492947	Membrane receptor	82.53	50	0.04	0.7003	built_models/moldata/GraphConv/1006-0146/
activity_492947	all_disease	85.07	75	0.06	0.8744	built_models/moldata/GraphConv/0921-2134/
activity_492947	virus	87.81	75	0.08	0.855	built_models/moldata/GraphConv/0924-0334/
activity_492947	all_target	82.91	100	0.07	0.9201	built_models/moldata/GraphConv/1006-0146/
activity_492953	all_disease	81.46	76.83	5.06	0.8712	built_models/moldata/GraphConv/0921-2134/
activity_492953	all_target	73.55	81.09	3.77	0.8477	built_models/moldata/GraphConv/1006-0146/
activity_492953	cardiovascular	69.9	84.16	3.44	0.8411	built_models/moldata/GraphConv/0923-1718/
activity_492953	Enzyme (other)	65.5	85.58	3.06	0.8418	built_models/moldata/GraphConv/1006-0146/
activity_492956	all_target	76.15	75.41	2.83	0.8287	built_models/moldata/GraphConv/1006-0146/
activity_492956	Hydrolase	60.42	81.97	1.86	0.817	built_models/moldata/GraphConv/1006-0419/
activity_492956	all_disease	79.63	74.75	3.28	0.8319	built_models/moldata/GraphConv/0921-2134/
activity_492956	cardiovascular	66.98	79.67	2.17	0.8228	built_models/moldata/GraphConv/0923-1718/
activity_492967	all_disease	80.22	58.14	0.71	0.7583	built_models/moldata/GraphConv/0921-2134/
activity_492967	bacteria	79.2	67.44	0.78	0.7951	built_models/moldata/GraphConv/0924-1339/
activity_492972	Hydrolase	67.85	90.14	1.18	0.9045	built_models/moldata/GraphConv/1006-0419/
activity_492972	cardiovascular	78.48	84.51	1.65	0.9105	built_models/moldata/GraphConv/0923-1718/
activity_492972	all_target	77.35	90.85	1.68	0.9275	built_models/moldata/GraphConv/1006-0146/
activity_492972	all_disease	77.56	91.55	1.71	0.9376	built_models/moldata/GraphConv/0921-2134/
activity_493008	all_disease	88.62	82.76	2.48	0.9132	built_models/moldata/GraphConv/0921-2134/
activity_493008	cardiovascular	78.48	81.9	1.31	0.8942	built_models/moldata/GraphConv/0923-1718/
activity_493011	all_target	73.59	67.5	1.27	0.7671	built_models/moldata/GraphConv/1006-0146/
activity_493011	all_disease	74.19	66.25	1.27	0.7663	built_models/moldata/GraphConv/0921-2134/
activity_493011	Hydrolase	60.99	71.88	0.91	0.7446	built_models/moldata/GraphConv/1006-0419/
activity_493011	virus	63.37	71.25	0.96	0.7495	built_models/moldata/GraphConv/0924-0334/
activity_493012	Hydrolase	64.76	81.02	0.97	0.8188	built_models/moldata/GraphConv/1006-0419/
activity_493012	virus	71.84	80.29	1.21	0.8247	built_models/moldata/GraphConv/0924-0334/
activity_493012	all_disease	70.88	80.29	1.17	0.8352	built_models/moldata/GraphConv/0921-2134/
activity_493012	all_target	67.78	81.75	1.07	0.8298	built_models/moldata/GraphConv/1006-0146/
activity_493014	cancer	81.43	58.82	0.23	0.7359	built_models/moldata/GraphConv/0921-2134/
activity_493014	all_disease	76.02	47.06	0.14	0.7136	built_models/moldata/GraphConv/0921-2134/
activity_493033	Enzyme (other)	72.74	83.22	2.82	0.8702	built_models/moldata/GraphConv/1006-0146/
activity_493033	all_disease	69.71	89.93	2.74	0.8809	built_models/moldata/GraphConv/0921-2134/
activity_493033	bacteria	69.06	81.21	2.44	0.8364	built_models/moldata/GraphConv/0924-1339/
activity_493033	all_target	72.74	86.58	2.93	0.8821	built_models/moldata/GraphConv/1006-0146/
activity_493036	nervous System	88.82	42.47	0.87	0.8024	built_models/moldata/GraphConv/0921-2135/
activity_493036	Membrane receptor	78.49	60.27	0.64	0.7815	built_models/moldata/GraphConv/1006-0146/
activity_493036	all_target	88.34	53.42	1.04	0.8334	built_models/moldata/GraphConv/1006-0146/
activity_493036	all_disease	87.58	56.16	1.03	0.8454	built_models/moldata/GraphConv/0921-2134/
activity_493056	Membrane receptor	55.42	45.27	0.65	0.5132	built_models/moldata/GraphConv/1006-0146/
activity_493056	all_target	53.53	49.25	0.68	0.506	built_models/moldata/GraphConv/1006-0146/
activity_493056	all_disease	51.48	52.24	0.69	0.5222	built_models/moldata/GraphConv/0921-2134/
activity_493056	nervous System	55.74	46.27	0.67	0.5212	built_models/moldata/GraphConv/0921-2135/
activity_493084	Membrane receptor	76.96	89.41	1.04	0.903	built_models/moldata/GraphConv/1006-0146/
activity_493084	nervous System	84.31	84.71	1.45	0.9039	built_models/moldata/GraphConv/0921-2135/
activity_493084	all_target	76.22	91.76	1.04	0.9254	built_models/moldata/GraphConv/1006-0146/
activity_493084	all_disease	79.41	88.24	1.15	0.9207	built_models/moldata/GraphConv/0921-2134/
activity_493087	nervous System	53.37	80.77	0.13	0.7757	built_models/moldata/GraphConv/0921-2135/
activity_493087	all_target	51.6	73.08	0.12	0.6793	built_models/moldata/GraphConv/1006-0146/
activity_493087	Enzyme (other)	40.41	80.77	0.11	0.7044	built_models/moldata/GraphConv/1006-0146/
activity_493087	obesity	36.48	84.62	0.1	0.692	built_models/moldata/GraphConv/0924-0333/
activity_493087	diabetes	44.05	80.77	0.11	0.676	built_models/moldata/GraphConv/0924-0334/
activity_493087	immune system	45.55	80.77	0.12	0.7198	built_models/moldata/GraphConv/0923-1718/
activity_493087	all_disease	48.38	80.77	0.12	0.6992	built_models/moldata/GraphConv/0921-2134/
activity_493091	Phosphatase	63.59	80.24	2.6	0.8032	built_models/moldata/GraphConv/1006-1129/
activity_493091	nervous System	75.89	70.24	3.43	0.8007	built_models/moldata/GraphConv/0921-2135/
activity_493091	all_disease	69.84	81.46	3.17	0.8335	built_models/moldata/GraphConv/0921-2134/
activity_493091	all_target	76.91	75.12	3.81	0.829	built_models/moldata/GraphConv/1006-0146/
activity_493098	all_target	88.16	68.22	4.26	0.8638	built_models/moldata/GraphConv/1006-0146/
activity_493098	Membrane receptor	83	70.16	3.07	0.8369	built_models/moldata/GraphConv/1006-0146/
activity_493098	cancer	87.63	63.18	3.8	0.8525	built_models/moldata/GraphConv/0921-2134/
activity_493098	all_disease	89.29	66.28	4.57	0.8641	built_models/moldata/GraphConv/0921-2134/
activity_493131	bacteria	73.38	74.44	2.92	0.8136	built_models/moldata/GraphConv/0924-1339/
activity_493131	all_disease	81.2	77.25	4.24	0.8712	built_models/moldata/GraphConv/0921-2134/
activity_493160	Transferase	93.93	63.27	2.96	0.8844	built_models/moldata/GraphConv/1006-0910/
activity_493160	metabolic disorders	91.76	58.16	2.02	0.8321	built_models/moldata/GraphConv/0924-1336/
activity_493160	all_target	91.15	74.49	2.38	0.8973	built_models/moldata/GraphConv/1006-0146/
activity_493160	diabetes	92.77	53.06	2.1	0.8383	built_models/moldata/GraphConv/0924-0334/
activity_493160	immune system	90.69	63.27	1.94	0.8614	built_models/moldata/GraphConv/0923-1718/
activity_493160	obesity	90.95	65.31	2.05	0.8559	built_models/moldata/GraphConv/0924-0333/
activity_493160	all_disease	88.84	72.45	1.84	0.8926	built_models/moldata/GraphConv/0921-2134/
activity_493187	obesity	75.2	75.61	0.37	0.8152	built_models/moldata/GraphConv/0924-0333/
activity_493187	all_target	74.63	78.05	0.37	0.8383	built_models/moldata/GraphConv/1006-0146/
activity_493187	diabetes	68.83	82.93	0.32	0.8189	built_models/moldata/GraphConv/0924-0334/
activity_493187	all_disease	67.79	82.93	0.31	0.8257	built_models/moldata/GraphConv/0921-2134/
activity_493187	Transferase	70.72	73.17	0.3	0.8034	built_models/moldata/GraphConv/1006-0910/
activity_493244	cardiovascular	56.4	59.57	0.19	0.6338	built_models/moldata/GraphConv/0923-1718/
activity_493244	all_disease	60.16	63.83	0.23	0.6824	built_models/moldata/GraphConv/0921-2134/
activity_504326	nervous System	80.4	73.51	1.68	0.8454	built_models/moldata/GraphConv/0921-2135/
activity_504326	Membrane receptor	79.22	68.87	1.49	0.8224	built_models/moldata/GraphConv/1006-0146/
activity_504326	pulmonary	81.44	63.58	1.54	0.8182	built_models/moldata/GraphConv/0924-2348/
activity_504326	all_target	77.25	78.15	1.54	0.8408	built_models/moldata/GraphConv/1006-0146/
activity_504326	all_disease	84.95	67.55	2.01	0.8417	built_models/moldata/GraphConv/0921-2134/
activity_504327	cancer	87.07	56	1.96	0.7901	built_models/moldata/GraphConv/0921-2134/
activity_504327	Epigenetic regulator	86.37	58	1.92	0.7958	built_models/moldata/GraphConv/1006-0641/
activity_504327	all_target	87.74	56	2.06	0.7803	built_models/moldata/GraphConv/1006-0146/
activity_504327	pulmonary	89.15	52	2.17	0.7787	built_models/moldata/GraphConv/0924-2348/
activity_504327	obesity	87.25	51.33	1.83	0.7929	built_models/moldata/GraphConv/0924-0333/
activity_504327	diabetes	86.4	52.67	1.76	0.7507	built_models/moldata/GraphConv/0924-0334/
activity_504327	all_disease	85.98	61.33	1.97	0.7988	built_models/moldata/GraphConv/0921-2134/
activity_504327	cardiovascular	87.71	55.33	2.03	0.7991	built_models/moldata/GraphConv/0923-1718/
activity_504327	immune system	86.47	58.67	1.96	0.8003	built_models/moldata/GraphConv/0923-1718/
activity_504332	cancer	77.28	58.38	30.27	0.7616	built_models/moldata/GraphConv/0921-2134/
activity_504332	all_disease	78.44	60.78	32.21	0.7782	built_models/moldata/GraphConv/0921-2134/
activity_504332	epigenetics_genetics	80.13	45.3	31.32	0.7251	built_models/moldata/GraphConv/0924-2345/
activity_504333	all_disease	58.78	86.39	11.49	0.8318	built_models/moldata/GraphConv/0921-2134/
activity_504333	all_target	54.02	88.59	10.61	0.8197	built_models/moldata/GraphConv/1006-0146/
activity_504333	Epigenetic regulator	54.52	87.57	10.62	0.819	built_models/moldata/GraphConv/1006-0641/
activity_504333	epigenetics_genetics	47.4	86.44	9.2	0.7663	built_models/moldata/GraphConv/0924-2345/
activity_504339	all_disease	75.45	74.45	16.1	0.8224	built_models/moldata/GraphConv/0921-2134/
activity_504339	all_target	71.01	78.2	14.35	0.8163	built_models/moldata/GraphConv/1006-0146/
activity_504339	epigenetics_genetics	74.97	64.92	14.38	0.7693	built_models/moldata/GraphConv/0924-2345/
activity_504339	Epigenetic regulator	73.61	72.04	14.74	0.8031	built_models/moldata/GraphConv/1006-0641/
activity_504357	nervous System	77.23	67.06	0.75	0.7598	built_models/moldata/GraphConv/0921-2135/
activity_504357	Membrane receptor	75.38	62.35	0.64	0.7667	built_models/moldata/GraphConv/1006-0146/
activity_504357	all_target	70.69	77.65	0.67	0.7973	built_models/moldata/GraphConv/1006-0146/
activity_504357	pulmonary	69.44	69.41	0.58	0.7674	built_models/moldata/GraphConv/0924-2348/
activity_504357	all_disease	65.4	77.65	0.57	0.7776	built_models/moldata/GraphConv/0921-2134/
activity_504406	all_disease	50.93	94.44	0.11	0.8974	built_models/moldata/GraphConv/0921-2134/
activity_504406	bacteria	40.09	94.44	0.09	0.8781	built_models/moldata/GraphConv/0924-1339/
activity_504411	Enzyme (other)	82.73	100	0.52	0.96	built_models/moldata/GraphConv/1006-0146/
activity_504411	nervous System	89.84	83.87	0.74	0.9522	built_models/moldata/GraphConv/0921-2135/
activity_504411	all_disease	85.76	93.55	0.59	0.9656	built_models/moldata/GraphConv/0921-2134/
activity_504411	all_target	89.68	87.1	0.76	0.9509	built_models/moldata/GraphConv/1006-0146/
activity_504423	all_disease	75.58	74.29	0.32	0.825	built_models/moldata/GraphConv/0921-2134/
activity_504423	cancer	75.67	68.57	0.29	0.806	built_models/moldata/GraphConv/0921-2134/
activity_504444	Transcription factor	74.48	66.95	7.82	0.7755	built_models/moldata/GraphConv/1006-0649/
activity_504444	all_target	76.56	66.1	8.39	0.7986	built_models/moldata/GraphConv/1006-0146/
activity_504444	cancer	77.53	59.51	8.01	0.7762	built_models/moldata/GraphConv/0921-2134/
activity_504444	all_disease	81.84	60.37	9.96	0.8047	built_models/moldata/GraphConv/0921-2134/
activity_504454	all_disease	88.5	47.29	2.47	0.7838	built_models/moldata/GraphConv/0921-2134/
activity_504454	nervous System	92.01	35.96	2.76	0.7583	built_models/moldata/GraphConv/0921-2135/
activity_504454	all_target	84.48	52.22	2.01	0.7669	built_models/moldata/GraphConv/1006-0146/
activity_504454	Membrane receptor	80.25	51.72	1.57	0.7288	built_models/moldata/GraphConv/1006-0146/
activity_504462	all_disease	82.19	67.66	2.22	0.8441	built_models/moldata/GraphConv/0921-2134/
activity_504462	all_target	81.74	71.64	2.29	0.8411	built_models/moldata/GraphConv/1006-0146/
activity_504462	cancer	82.19	67.66	2.22	0.8337	built_models/moldata/GraphConv/0921-2134/
activity_504462	Enzyme (other)	79.03	67.16	1.88	0.8056	built_models/moldata/GraphConv/1006-0146/
activity_504462	fungal	74.22	75.62	1.71	0.8175	built_models/moldata/GraphConv/0925-0953/
activity_504466	all_disease	89.06	69.9	7.74	0.8916	built_models/moldata/GraphConv/0921-2134/
activity_504466	cancer	93.22	53.93	9.93	0.8793	built_models/moldata/GraphConv/0921-2134/
activity_504467	all_disease	84.58	56.36	16.29	0.8188	built_models/moldata/GraphConv/0921-2134/
activity_504467	cancer	78.48	63.27	12.87	0.798	built_models/moldata/GraphConv/0921-2134/
activity_504490	cancer	34.23	65.14	0.32	0.501	built_models/moldata/GraphConv/0921-2134/
activity_504490	all_disease	22.16	81.65	0.34	0.5289	built_models/moldata/GraphConv/0921-2134/
activity_504490	immune system	36.07	55.96	0.28	0.4413	built_models/moldata/GraphConv/0923-1718/
activity_504523	Transcription factor	46.7	72.13	0.25	0.6737	built_models/moldata/GraphConv/1006-0649/
activity_504523	all_target	43.38	80.33	0.26	0.7135	built_models/moldata/GraphConv/1006-0146/
activity_504523	nervous System	37.77	88.52	0.26	0.7192	built_models/moldata/GraphConv/0921-2135/
activity_504523	all_disease	40.54	85.25	0.26	0.7458	built_models/moldata/GraphConv/0921-2134/
activity_504523	cancer	35.05	86.89	0.24	0.7115	built_models/moldata/GraphConv/0921-2134/
activity_504523	immune system	46.98	77.05	0.26	0.7361	built_models/moldata/GraphConv/0923-1718/
activity_504558	virus	78.76	62.03	3.12	0.7487	built_models/moldata/GraphConv/0924-0334/
activity_504558	all_disease	78.94	65.24	3.3	0.7811	built_models/moldata/GraphConv/0921-2134/
activity_504577	all_target	90.73	10.61	0.45	0.5321	built_models/moldata/GraphConv/1006-0146/
activity_504577	Hydrolase	80.73	14.39	0.29	0.4968	built_models/moldata/GraphConv/1006-0419/
activity_504577	all_disease	85.66	12.12	0.33	0.5011	built_models/moldata/GraphConv/0921-2134/
activity_504577	virus	82.32	25.76	0.56	0.5391	built_models/moldata/GraphConv/0924-0334/
activity_504582	all_disease	67.59	70.36	1.8	0.7722	built_models/moldata/GraphConv/0921-2134/
activity_504582	parasite	72.65	66.07	2	0.7509	built_models/moldata/GraphConv/0924-1340/
activity_504621	parasite	84.11	60.27	1.81	0.8177	built_models/moldata/GraphConv/0924-1340/
activity_504621	all_disease	85.51	74.66	2.44	0.8768	built_models/moldata/GraphConv/0921-2134/
activity_504634	all_target	59.34	61.11	0.16	0.6489	built_models/moldata/GraphConv/1006-0146/
activity_504634	nervous System	57.97	58.33	0.15	0.6222	built_models/moldata/GraphConv/0921-2135/
activity_504634	Membrane receptor	61.9	52.78	0.15	0.6156	built_models/moldata/GraphConv/1006-0146/
activity_504634	all_disease	55.97	69.44	0.17	0.6802	built_models/moldata/GraphConv/0921-2134/
activity_504648	all_disease	88.98	69.35	2.34	0.8814	built_models/moldata/GraphConv/0921-2134/
activity_504648	cancer	82.66	71.77	1.55	0.8695	built_models/moldata/GraphConv/0921-2134/
activity_504651	nervous System	55.21	50	0.03	0.5808	built_models/moldata/GraphConv/0921-2135/
activity_504651	immune system	56.01	62.5	0.04	0.5683	built_models/moldata/GraphConv/0923-1718/
activity_504651	all_target	63.05	75	0.05	0.6295	built_models/moldata/GraphConv/1006-0146/
activity_504651	Membrane receptor	53.04	50	0.03	0.5517	built_models/moldata/GraphConv/1006-0146/
activity_504651	all_disease	46.32	75	0.04	0.7251	built_models/moldata/GraphConv/0921-2134/
activity_504652	all_disease	85.4	25.41	5.77	0.617	built_models/moldata/GraphConv/0921-2134/
activity_504652	immune system	82.73	28.23	5.28	0.6048	built_models/moldata/GraphConv/0923-1718/
activity_504652	all_target	84.86	28.01	6.05	0.6232	built_models/moldata/GraphConv/1006-0146/
activity_504652	Membrane receptor	86.97	22.04	5.79	0.6012	built_models/moldata/GraphConv/1006-0146/
activity_504652	nervous System	84.95	26.38	5.78	0.5986	built_models/moldata/GraphConv/0921-2135/
activity_504660	nervous System	76.48	72.41	3.35	0.8161	built_models/moldata/GraphConv/0921-2135/
activity_504660	Membrane receptor	70.74	71.26	2.66	0.778	built_models/moldata/GraphConv/1006-0146/
activity_504660	immune system	73.46	71.84	2.95	0.7929	built_models/moldata/GraphConv/0923-1718/
activity_504660	all_disease	76.82	74.43	3.48	0.8255	built_models/moldata/GraphConv/0921-2134/
activity_504660	all_target	73.46	74.71	3.06	0.8097	built_models/moldata/GraphConv/1006-0146/
activity_504690	all_target	69.05	86.39	3.13	0.8459	built_models/moldata/GraphConv/1006-0146/
activity_504690	all_disease	69.63	85.89	3.17	0.8584	built_models/moldata/GraphConv/0921-2134/
activity_504690	parasite	63.79	83.17	2.59	0.8211	built_models/moldata/GraphConv/0924-1340/
activity_504690	Enzyme (other)	63.56	86.14	2.66	0.8389	built_models/moldata/GraphConv/1006-0146/
activity_504692	Membrane receptor	51.62	67.61	0.89	0.6424	built_models/moldata/GraphConv/1006-0146/
activity_504692	all_target	52.96	64.79	0.87	0.6377	built_models/moldata/GraphConv/1006-0146/
activity_504692	nervous System	56.57	66.67	0.97	0.6618	built_models/moldata/GraphConv/0921-2135/
activity_504692	all_disease	57.85	62.44	0.94	0.6617	built_models/moldata/GraphConv/0921-2134/
activity_504700	cancer	47.88	61.11	0.06	0.6197	built_models/moldata/GraphConv/0921-2134/
activity_504700	Kinase	29.37	50	0.04	0.3961	built_models/moldata/GraphConv/1006-0645/
activity_504700	all_disease	32.83	66.67	0.05	0.5021	built_models/moldata/GraphConv/0921-2134/
activity_504700	all_target	42.62	61.11	0.06	0.4905	built_models/moldata/GraphConv/1006-0146/
activity_504706	all_target	73.58	76.19	0.2	0.8112	built_models/moldata/GraphConv/1006-0146/
activity_504706	cancer	79.79	76.19	0.27	0.8324	built_models/moldata/GraphConv/0921-2134/
activity_504706	all_disease	72.28	76.19	0.19	0.8125	built_models/moldata/GraphConv/0921-2134/
activity_504706	Transcription factor	73.17	71.43	0.19	0.7729	built_models/moldata/GraphConv/1006-0649/
activity_504707	Kinase	84.73	14.71	0.1	0.4444	built_models/moldata/GraphConv/1006-0645/
activity_504707	all_disease	73.58	35.29	0.13	0.558	built_models/moldata/GraphConv/0921-2134/
activity_504707	all_target	76.97	23.53	0.1	0.5452	built_models/moldata/GraphConv/1006-0146/
activity_504707	cancer	64.21	32.35	0.09	0.4899	built_models/moldata/GraphConv/0921-2134/
activity_504720	all_target	78.12	70.59	1.4	0.8037	built_models/moldata/GraphConv/1006-0146/
activity_504720	bacteria	74.87	69.28	1.19	0.7752	built_models/moldata/GraphConv/0924-1339/
activity_504720	all_disease	75.43	73.2	1.29	0.8107	built_models/moldata/GraphConv/0921-2134/
activity_504720	Enzyme (other)	81.21	44.44	1.03	0.7014	built_models/moldata/GraphConv/1006-0146/
activity_504734	immune system	78.13	80.85	1	0.88	built_models/moldata/GraphConv/0923-1718/
activity_504734	Membrane receptor	59.69	89.36	0.6	0.8448	built_models/moldata/GraphConv/1006-0146/
activity_504734	all_target	74.27	86.17	0.91	0.8699	built_models/moldata/GraphConv/1006-0146/
activity_504734	all_disease	82.49	80.85	1.25	0.8584	built_models/moldata/GraphConv/0921-2134/
activity_504766	cancer	55.45	58.93	1.22	0.6048	built_models/moldata/GraphConv/0921-2134/
activity_504766	all_disease	62.25	52.35	1.29	0.6097	built_models/moldata/GraphConv/0921-2134/
activity_504766	all_target	60.31	51.41	1.2	0.6056	built_models/moldata/GraphConv/1006-0146/
activity_504766	Nuclear receptor	63.6	48.9	1.25	0.5923	built_models/moldata/GraphConv/1006-0423/
activity_504770	all_disease	84.43	54.35	0.84	0.7167	built_models/moldata/GraphConv/0921-2134/
activity_504770	bacteria	75.16	60.87	0.59	0.6816	built_models/moldata/GraphConv/0924-1339/
activity_504775	cardiovascular	71.74	24.32	0.1	0.5353	built_models/moldata/GraphConv/0923-1718/
activity_504775	Membrane receptor	71.2	32.43	0.13	0.5562	built_models/moldata/GraphConv/1006-0146/
activity_504775	all_target	70.37	37.84	0.15	0.5434	built_models/moldata/GraphConv/1006-0146/
activity_504775	obesity	67.69	29.73	0.11	0.5337	built_models/moldata/GraphConv/0924-0333/
activity_504775	all_disease	64.46	37.84	0.12	0.5512	built_models/moldata/GraphConv/0921-2134/
activity_504803	all_target	88.84	77.34	4.98	0.9088	built_models/moldata/GraphConv/1006-0146/
activity_504803	Hydrolase	90.97	70.7	5.64	0.91	built_models/moldata/GraphConv/1006-0419/
activity_504803	nervous System	86.14	73.83	3.87	0.8885	built_models/moldata/GraphConv/0921-2135/
activity_504803	aging	88.68	60.16	3.91	0.8321	built_models/moldata/GraphConv/0925-0951/
activity_504803	all_disease	89.1	79.69	5.23	0.9199	built_models/moldata/GraphConv/0921-2134/
activity_504810	Membrane receptor	61.78	59.09	0.32	0.6277	built_models/moldata/GraphConv/1006-0146/
activity_504810	immune system	78.54	39.39	0.38	0.6793	built_models/moldata/GraphConv/0923-1718/
activity_504810	metabolic disorders	54.94	51.52	0.24	0.5772	built_models/moldata/GraphConv/0924-1336/
activity_504810	all_target	70.55	57.58	0.4	0.6987	built_models/moldata/GraphConv/1006-0146/
activity_504810	cancer	73.33	48.48	0.38	0.6848	built_models/moldata/GraphConv/0921-2134/
activity_504810	all_disease	68.1	56.06	0.36	0.6724	built_models/moldata/GraphConv/0921-2134/
activity_504812	cancer	71.99	51.52	0.38	0.6827	built_models/moldata/GraphConv/0921-2134/
activity_504812	all_target	72.29	59.09	0.44	0.7085	built_models/moldata/GraphConv/1006-0146/
activity_504812	immune system	78.44	43.94	0.42	0.693	built_models/moldata/GraphConv/0923-1718/
activity_504812	metabolic disorders	53.65	50	0.22	0.5821	built_models/moldata/GraphConv/0924-1336/
activity_504812	Membrane receptor	65.12	56.06	0.33	0.6599	built_models/moldata/GraphConv/1006-0146/
activity_504812	all_disease	64.96	59.09	0.35	0.6777	built_models/moldata/GraphConv/0921-2134/
activity_504832	parasite	58.8	83.84	17.39	0.7898	built_models/moldata/GraphConv/0924-1340/
activity_504832	all_disease	71.99	81.53	23.65	0.8455	built_models/moldata/GraphConv/0921-2134/
activity_504834	parasite	58.94	67.57	18.94	0.6717	built_models/moldata/GraphConv/0924-1340/
activity_504834	all_disease	63.03	67.22	20.75	0.704	built_models/moldata/GraphConv/0921-2134/
activity_504842	all_disease	70.65	92.86	0.14	0.8495	built_models/moldata/GraphConv/0921-2134/
activity_504842	cancer	78.15	85.71	0.17	0.8909	built_models/moldata/GraphConv/0921-2134/
activity_504845	all_disease	83.07	66.67	0.11	0.7123	built_models/moldata/GraphConv/0921-2134/
activity_504845	nervous System	76.62	55.56	0.06	0.7249	built_models/moldata/GraphConv/0921-2135/
activity_504847	cardiovascular	85.9	56.51	6.09	0.7884	built_models/moldata/GraphConv/0923-1718/
activity_504847	all_disease	87.62	57.81	7.06	0.815	built_models/moldata/GraphConv/0921-2134/
activity_504847	all_target	89.31	54.65	7.77	0.8253	built_models/moldata/GraphConv/1006-0146/
activity_504847	aging	88.78	42.01	5.9	0.7458	built_models/moldata/GraphConv/0925-0951/
activity_504847	Nuclear receptor	88.52	47.77	6.45	0.7838	built_models/moldata/GraphConv/1006-0423/
activity_504884	bacteria	67.35	53.12	0.14	0.6484	built_models/moldata/GraphConv/0924-1339/
activity_504884	all_disease	61.55	65.62	0.15	0.7328	built_models/moldata/GraphConv/0921-2134/
activity_504891	cancer	91.33	75	0.11	0.9758	built_models/moldata/GraphConv/0921-2134/
activity_504891	immune system	84.46	100	0.08	0.9753	built_models/moldata/GraphConv/0923-1718/
activity_504891	aging	77.71	100	0.06	0.9668	built_models/moldata/GraphConv/0925-0951/
activity_504891	nervous System	86.81	100	0.09	0.9929	built_models/moldata/GraphConv/0921-2135/
activity_504891	all_disease	85.03	100	0.08	0.9876	built_models/moldata/GraphConv/0921-2134/
activity_504937	all_target	97.13	0	0	0.7323	built_models/moldata/GraphConv/1006-0146/
activity_504937	all_disease	97.36	0	0	0.7957	built_models/moldata/GraphConv/0921-2134/
activity_504937	immune system	96.24	0	0	0.7834	built_models/moldata/GraphConv/0923-1718/
activity_504937	cardiovascular	93.93	0	0	0.8451	built_models/moldata/GraphConv/0923-1718/
activity_504937	NTPase	99.99	0	0	0.7859	built_models/moldata/GraphConv/1006-1136/
activity_540253	cancer	81.75	56.25	0.31	0.7856	built_models/moldata/GraphConv/0921-2134/
activity_540253	all_disease	79.51	75	0.36	0.84	built_models/moldata/GraphConv/0921-2134/
activity_540256	all_disease	78.96	61.57	6.43	0.7904	built_models/moldata/GraphConv/0921-2134/
activity_540256	virus	71.8	66.2	5.15	0.7646	built_models/moldata/GraphConv/0924-0334/
activity_540263	all_disease	55.27	62.5	0.04	0.7213	built_models/moldata/GraphConv/0921-2134/
activity_540263	cancer	67.63	62.5	0.05	0.6661	built_models/moldata/GraphConv/0921-2134/
activity_540267	all_disease	91.21	76.67	1.54	0.9324	built_models/moldata/GraphConv/0921-2134/
activity_540267	parasite	92.86	71.67	1.77	0.9234	built_models/moldata/GraphConv/0924-1340/
activity_540275	immune system	73.19	56.52	0.33	0.7354	built_models/moldata/GraphConv/0923-1718/
activity_540275	all_target	78.48	54.35	0.4	0.7383	built_models/moldata/GraphConv/1006-0146/
activity_540275	all_disease	79.38	60.87	0.47	0.7921	built_models/moldata/GraphConv/0921-2134/
activity_540275	Ion channel	78.9	52.17	0.39	0.7692	built_models/moldata/GraphConv/1006-0914/
activity_540275	nervous System	79.29	67.39	0.52	0.7959	built_models/moldata/GraphConv/0921-2135/
activity_540276	all_disease	84.9	60.64	11.04	0.8253	built_models/moldata/GraphConv/0921-2134/
activity_540276	virus	82.51	57.43	9.17	0.792	built_models/moldata/GraphConv/0924-0334/
activity_540277	all_disease	75.23	33.33	0.03	0.5007	built_models/moldata/GraphConv/0921-2134/
activity_540277	nervous System	83.67	16.67	0.02	0.6044	built_models/moldata/GraphConv/0921-2135/
activity_540277	Ion channel	71.2	50	0.03	0.603	built_models/moldata/GraphConv/1006-0914/
activity_540277	immune system	79.11	33.33	0.03	0.694	built_models/moldata/GraphConv/0923-1718/
activity_540277	all_target	75.79	16.67	0.01	0.6155	built_models/moldata/GraphConv/1006-0146/
activity_540299	all_disease	42.57	65.62	0.47	0.5839	built_models/moldata/GraphConv/0921-2134/
activity_540299	bacteria	41.22	71.88	0.51	0.5988	built_models/moldata/GraphConv/0924-1339/
activity_540303	all_disease	68.28	69.61	0.72	0.7562	built_models/moldata/GraphConv/0921-2134/
activity_540303	Protease	69.08	50.98	0.54	0.6396	built_models/moldata/GraphConv/1006-0416/
activity_540303	Membrane receptor	72.49	56.86	0.68	0.708	built_models/moldata/GraphConv/1006-0146/
activity_540303	cancer	69.67	64.71	0.7	0.753	built_models/moldata/GraphConv/0921-2134/
activity_540303	all_target	67.18	73.53	0.73	0.7509	built_models/moldata/GraphConv/1006-0146/
activity_540317	all_target	87.01	74.09	4.59	0.889	built_models/moldata/GraphConv/1006-0146/
activity_540317	Epigenetic regulator	88.92	72.99	5.28	0.8717	built_models/moldata/GraphConv/1006-0641/
activity_540317	all_disease	85.37	79.2	4.35	0.8924	built_models/moldata/GraphConv/0921-2134/
activity_540317	nervous System	87.71	69.71	4.58	0.8663	built_models/moldata/GraphConv/0921-2135/
activity_540317	cancer	86.08	75.18	4.35	0.8814	built_models/moldata/GraphConv/0921-2134/
activity_540336	all_disease	86.86	29.31	0.4	0.6677	built_models/moldata/GraphConv/0921-2134/
activity_540336	cancer	83.61	32.76	0.36	0.6592	built_models/moldata/GraphConv/0921-2134/
activity_540336	fungal	81.31	44.83	0.43	0.6576	built_models/moldata/GraphConv/0925-0953/
activity_540364	nervous System	87.7	32.44	1.68	0.713	built_models/moldata/GraphConv/0921-2135/
activity_540364	all_disease	87.52	40	2.02	0.7682	built_models/moldata/GraphConv/0921-2134/
activity_540364	epigenetics_genetics	80.33	43.56	1.39	0.6985	built_models/moldata/GraphConv/0924-2345/
activity_588334	cancer	80.84	74.6	2.45	0.8503	built_models/moldata/GraphConv/0921-2134/
activity_588334	all_disease	81.01	70.9	2.35	0.8527	built_models/moldata/GraphConv/0921-2134/
activity_588335	all_disease	81.37	79.03	6.26	0.8889	built_models/moldata/GraphConv/0921-2134/
activity_588335	bacteria	78.79	81.18	5.67	0.8727	built_models/moldata/GraphConv/0924-1339/
activity_588352	cancer	87.38	54.79	1.72	0.802	built_models/moldata/GraphConv/0921-2134/
activity_588352	all_disease	83.46	66.44	1.58	0.8315	built_models/moldata/GraphConv/0921-2134/
activity_588352	Epigenetic regulator	82.8	55.48	1.28	0.7826	built_models/moldata/GraphConv/1006-0641/
activity_588352	all_target	84.85	56.16	1.46	0.8024	built_models/moldata/GraphConv/1006-0146/
activity_588354	cancer	92.62	42.86	1.66	0.832	built_models/moldata/GraphConv/0921-2134/
activity_588354	Epigenetic regulator	92.88	38.1	1.54	0.8082	built_models/moldata/GraphConv/1006-0641/
activity_588354	all_target	90.21	47.62	1.39	0.8175	built_models/moldata/GraphConv/1006-0146/
activity_588354	all_disease	90.72	56.19	1.72	0.8323	built_models/moldata/GraphConv/0921-2134/
activity_588358	all_disease	27.03	89.3	0.73	0.6983	built_models/moldata/GraphConv/0921-2134/
activity_588358	immune system	33.74	86.1	0.78	0.6857	built_models/moldata/GraphConv/0923-1718/
activity_588391	all_disease	53.84	81.82	0.17	0.8136	built_models/moldata/GraphConv/0921-2134/
activity_588391	cardiovascular	52.72	84.85	0.17	0.7948	built_models/moldata/GraphConv/0923-1718/
activity_588405	all_disease	72.25	81.62	6.98	0.85	built_models/moldata/GraphConv/0921-2134/
activity_588405	cancer	66.24	83.03	5.88	0.8236	built_models/moldata/GraphConv/0921-2134/
activity_588413	all_target	72.27	61.78	2.26	0.733	built_models/moldata/GraphConv/1006-0146/
activity_588413	nervous System	66.83	62.36	1.91	0.7035	built_models/moldata/GraphConv/0921-2135/
activity_588413	all_disease	70.09	65.52	2.22	0.7393	built_models/moldata/GraphConv/0921-2134/
activity_588413	cancer	70.06	60.06	2.04	0.7111	built_models/moldata/GraphConv/0921-2134/
activity_588413	Transcription factor	72.44	59.48	2.2	0.7176	built_models/moldata/GraphConv/1006-0649/
activity_588436	all_disease	55.49	62.07	0.23	0.6203	built_models/moldata/GraphConv/0921-2134/
activity_588436	bacteria	53.33	60.34	0.21	0.6157	built_models/moldata/GraphConv/0924-1339/
activity_588453	all_disease	88.35	68.22	8.37	0.8776	built_models/moldata/GraphConv/0921-2134/
activity_588453	Oxidoreductase	87.58	62.75	7.33	0.8516	built_models/moldata/GraphConv/1006-0906/
activity_588453	all_target	88.21	64.57	7.9	0.862	built_models/moldata/GraphConv/1006-0146/
activity_588453	cancer	84.25	69.84	6.39	0.8581	built_models/moldata/GraphConv/0921-2134/
activity_588456	all_target	94.96	100	0.62	0.9974	built_models/moldata/GraphConv/1006-0146/
activity_588456	all_disease	92.24	100	0.41	0.9959	built_models/moldata/GraphConv/0921-2134/
activity_588456	Oxidoreductase	85.59	100	0.22	0.9848	built_models/moldata/GraphConv/1006-0906/
activity_588456	cancer	96.65	90.91	0.85	0.9882	built_models/moldata/GraphConv/0921-2134/
activity_588458	Epigenetic regulator	58.72	80.72	2.46	0.7825	built_models/moldata/GraphConv/1006-0641/
activity_588458	cancer	60.91	85.38	2.73	0.8279	built_models/moldata/GraphConv/0921-2134/
activity_588458	all_disease	69.14	80.93	3.28	0.8333	built_models/moldata/GraphConv/0921-2134/
activity_588458	all_target	65.07	81.36	2.92	0.8199	built_models/moldata/GraphConv/1006-0146/
activity_588473	Membrane receptor	70.32	66.98	1.35	0.7463	built_models/moldata/GraphConv/1006-0146/
activity_588473	all_disease	85.57	60.38	2.51	0.7698	built_models/moldata/GraphConv/0921-2134/
activity_588473	nervous System	84.17	60.38	2.29	0.7779	built_models/moldata/GraphConv/0921-2135/
activity_588473	all_target	75.82	69.34	1.72	0.7857	built_models/moldata/GraphConv/1006-0146/
activity_588475	Membrane receptor	39.07	59.22	0.57	0.5269	built_models/moldata/GraphConv/1006-0146/
activity_588475	nervous System	45.2	57.77	0.62	0.5512	built_models/moldata/GraphConv/0921-2135/
activity_588475	all_disease	55.27	50	0.66	0.5577	built_models/moldata/GraphConv/0921-2134/
activity_588475	all_target	54.54	57.28	0.74	0.5713	built_models/moldata/GraphConv/1006-0146/
activity_588489	all_disease	59.92	85.16	1.04	0.804	built_models/moldata/GraphConv/0921-2134/
activity_588489	cancer	72.3	69.78	1.24	0.7877	built_models/moldata/GraphConv/0921-2134/
activity_588489	nervous System	72.1	69.23	1.22	0.7868	built_models/moldata/GraphConv/0921-2135/
activity_588492	cardiovascular	62.84	84.89	1.9	0.8195	built_models/moldata/GraphConv/0923-1718/
activity_588492	all_disease	67.6	82.96	2.12	0.8422	built_models/moldata/GraphConv/0921-2134/
activity_588493	all_disease	74.45	72	2.45	0.804	built_models/moldata/GraphConv/0921-2134/
activity_588493	cancer	72.39	73.54	2.31	0.7955	built_models/moldata/GraphConv/0921-2134/
activity_588497	cancer	99.05	7.5	2.19	0.6584	built_models/moldata/GraphConv/0921-2134/
activity_588497	Enzyme (other)	99.18	3.75	1.36	0.6137	built_models/moldata/GraphConv/1006-0146/
activity_588497	virus	99.08	1.25	0.4	0.63	built_models/moldata/GraphConv/0924-0334/
activity_588497	all_target	98.66	1.25	0.25	0.65	built_models/moldata/GraphConv/1006-0146/
activity_588497	cardiovascular	99.14	3.75	1.28	0.6579	built_models/moldata/GraphConv/0923-1718/
activity_588497	immune system	99.34	1.25	0.62	0.6065	built_models/moldata/GraphConv/0923-1718/
activity_588497	all_disease	98.77	7.5	1.6	0.6223	built_models/moldata/GraphConv/0921-2134/
activity_588499	cancer	86.33	70.59	1.44	0.8893	built_models/moldata/GraphConv/0921-2134/
activity_588499	all_disease	85.28	76.47	1.45	0.895	built_models/moldata/GraphConv/0921-2134/
activity_588499	immune system	85.91	74.51	1.47	0.8866	built_models/moldata/GraphConv/0923-1718/
activity_588499	all_target	87.91	70.59	1.63	0.8969	built_models/moldata/GraphConv/1006-0146/
activity_588499	toxicity	84.25	73.53	1.3	0.8734	built_models/moldata/GraphConv/0923-1718/
activity_588499	Protease	81.85	74.51	1.15	0.8586	built_models/moldata/GraphConv/1006-0416/
activity_588501	all_disease	82.56	65.28	0.73	0.8242	built_models/moldata/GraphConv/0921-2134/
activity_588501	all_target	89.62	58.33	1.1	0.7919	built_models/moldata/GraphConv/1006-0146/
activity_588501	cancer	91.1	52.78	1.16	0.7962	built_models/moldata/GraphConv/0921-2134/
activity_588501	immune system	92.57	52.78	1.39	0.8015	built_models/moldata/GraphConv/0923-1718/
activity_588501	cardiovascular	84.91	58.33	0.75	0.7739	built_models/moldata/GraphConv/0923-1718/
activity_588501	Protease	87.8	48.61	0.78	0.73	built_models/moldata/GraphConv/1006-0416/
activity_588501	virus	86.17	58.33	0.82	0.8017	built_models/moldata/GraphConv/0924-0334/
activity_588511	immune system	60.88	64.39	2.27	0.6797	built_models/moldata/GraphConv/0923-1718/
activity_588511	cardiovascular	55.82	69.81	2.17	0.6736	built_models/moldata/GraphConv/0923-1718/
activity_588511	pulmonary	60.02	66.75	2.3	0.6752	built_models/moldata/GraphConv/0924-2348/
activity_588511	all_target	69.91	60.85	2.78	0.7145	built_models/moldata/GraphConv/1006-0146/
activity_588511	Ion channel	61.38	59.67	2.13	0.6584	built_models/moldata/GraphConv/1006-0914/
activity_588511	all_disease	69.32	59.43	2.67	0.7171	built_models/moldata/GraphConv/0921-2134/
activity_588519	Protease	74.66	48	1.22	0.6802	built_models/moldata/GraphConv/1006-0416/
activity_588519	virus	60.49	74	1.2	0.7266	built_models/moldata/GraphConv/0924-0334/
activity_588519	all_disease	60.92	74	1.21	0.7524	built_models/moldata/GraphConv/0921-2134/
activity_588519	all_target	54.46	76	1.07	0.7289	built_models/moldata/GraphConv/1006-0146/
activity_588549	bacteria	84.92	66.67	1.15	0.8578	built_models/moldata/GraphConv/0924-1339/
activity_588549	all_disease	86.77	75	1.47	0.8903	built_models/moldata/GraphConv/0921-2134/
activity_588549	all_target	90.48	65.62	1.79	0.8694	built_models/moldata/GraphConv/1006-0146/
activity_588549	Enzyme (other)	88.7	71.88	1.65	0.8803	built_models/moldata/GraphConv/1006-0146/
activity_588579	all_target	92.92	67.75	8.57	0.9018	built_models/moldata/GraphConv/1006-0146/
activity_588579	all_disease	90.46	72.19	6.8	0.9064	built_models/moldata/GraphConv/0921-2134/
activity_588579	cancer	88.97	72.49	5.94	0.894	built_models/moldata/GraphConv/0921-2134/
activity_588579	Enzyme (other)	89.37	69.53	5.93	0.8912	built_models/moldata/GraphConv/1006-0146/
activity_588590	all_disease	71.74	83.3	4.72	0.8516	built_models/moldata/GraphConv/0921-2134/
activity_588590	cancer	68.31	82.92	4.21	0.849	built_models/moldata/GraphConv/0921-2134/
activity_588590	Transferase	69.32	80.27	4.21	0.8292	built_models/moldata/GraphConv/1006-0910/
activity_588590	all_target	70.43	81.97	4.45	0.8531	built_models/moldata/GraphConv/1006-0146/
activity_588591	Transferase	84.43	70.44	8.19	0.8694	built_models/moldata/GraphConv/1006-0910/
activity_588591	cancer	81.31	77.83	7.49	0.8778	built_models/moldata/GraphConv/0921-2134/
activity_588591	all_disease	82.4	80.66	8.17	0.8895	built_models/moldata/GraphConv/0921-2134/
activity_588591	all_target	87.23	71.7	10.02	0.8834	built_models/moldata/GraphConv/1006-0146/
activity_588621	obesity	93	43.81	1.79	0.7973	built_models/moldata/GraphConv/0924-0333/
activity_588621	cancer	96.17	37.14	2.82	0.8052	built_models/moldata/GraphConv/0921-2134/
activity_588621	all_disease	90.08	53.33	1.53	0.7923	built_models/moldata/GraphConv/0921-2134/
activity_588621	all_target	94.72	45.71	2.48	0.8043	built_models/moldata/GraphConv/1006-0146/
activity_588621	nervous System	94.12	38.1	1.87	0.7719	built_models/moldata/GraphConv/0921-2135/
activity_588621	diabetes	93.43	43.81	1.91	0.7789	built_models/moldata/GraphConv/0924-0334/
activity_588621	immune system	95.74	35.24	2.41	0.7925	built_models/moldata/GraphConv/0923-1718/
activity_588621	Phosphatase	93.44	39.05	1.71	0.7951	built_models/moldata/GraphConv/1006-1129/
activity_588627	all_target	68.74	77.58	1.33	0.8042	built_models/moldata/GraphConv/1006-0146/
activity_588627	all_disease	79.36	59.39	1.55	0.7815	built_models/moldata/GraphConv/0921-2134/
activity_588627	nervous System	71.76	70.91	1.35	0.7787	built_models/moldata/GraphConv/0921-2135/
activity_588627	Membrane receptor	63.65	72.12	1.07	0.7519	built_models/moldata/GraphConv/1006-0146/
activity_588664	Kinase	40.44	73.53	0.68	0.6315	built_models/moldata/GraphConv/1006-0645/
activity_588664	all_target	38.74	86.76	0.78	0.738	built_models/moldata/GraphConv/1006-0146/
activity_588664	cancer	32.37	87.75	0.71	0.7125	built_models/moldata/GraphConv/0921-2134/
activity_588664	all_disease	33.42	83.33	0.69	0.7038	built_models/moldata/GraphConv/0921-2134/
activity_588675	Membrane receptor	75.81	31.18	0.72	0.6091	built_models/moldata/GraphConv/1006-0146/
activity_588675	all_target	88.66	24.12	1.22	0.6354	built_models/moldata/GraphConv/1006-0146/
activity_588675	nervous System	87.26	22.94	1.03	0.6341	built_models/moldata/GraphConv/0921-2135/
activity_588675	all_disease	81.13	33.53	1	0.6272	built_models/moldata/GraphConv/0921-2134/
activity_588676	all_disease	77.1	27.51	1.69	0.5541	built_models/moldata/GraphConv/0921-2134/
activity_588676	Membrane receptor	73.67	32.54	1.73	0.5449	built_models/moldata/GraphConv/1006-0146/
activity_588676	all_target	82.93	24.4	2.04	0.5555	built_models/moldata/GraphConv/1006-0146/
activity_588676	nervous System	86.55	19.38	2.11	0.5453	built_models/moldata/GraphConv/0921-2135/
activity_588692	all_disease	63.46	83.33	0.67	0.7978	built_models/moldata/GraphConv/0921-2134/
activity_588692	cancer	61.29	75	0.57	0.763	built_models/moldata/GraphConv/0921-2134/
activity_588726	bacteria	72.62	83.15	6.93	0.8463	built_models/moldata/GraphConv/0924-1339/
activity_588726	all_disease	76.7	80.67	7.86	0.8511	built_models/moldata/GraphConv/0921-2134/
activity_588795	all_target	83.51	86.79	3.19	0.9319	built_models/moldata/GraphConv/1006-0146/
activity_588795	all_disease	83.13	88.68	3.18	0.9319	built_models/moldata/GraphConv/0921-2134/
activity_588795	Hydrolase	71.47	89.15	1.91	0.8957	built_models/moldata/GraphConv/1006-0419/
activity_588795	cancer	80.47	88.68	2.76	0.9274	built_models/moldata/GraphConv/0921-2134/
activity_588814	all_target	75.64	61.9	0.87	0.7488	built_models/moldata/GraphConv/1006-0146/
activity_588814	Membrane receptor	67.76	65.08	0.69	0.7175	built_models/moldata/GraphConv/1006-0146/
activity_588814	nervous System	75.37	53.17	0.74	0.7159	built_models/moldata/GraphConv/0921-2135/
activity_588814	all_disease	87.83	41.27	1.17	0.7243	built_models/moldata/GraphConv/0921-2134/
activity_588819	nervous System	51.48	42.42	0.08	0.4779	built_models/moldata/GraphConv/0921-2135/
activity_588819	all_target	56.39	39.39	0.08	0.4897	built_models/moldata/GraphConv/1006-0146/
activity_588819	Membrane receptor	62.08	27.27	0.06	0.4696	built_models/moldata/GraphConv/1006-0146/
activity_588819	all_disease	46.8	60.61	0.1	0.5289	built_models/moldata/GraphConv/0921-2134/
activity_588850	all_target	79.07	70.43	4.72	0.8375	built_models/moldata/GraphConv/1006-0146/
activity_588850	all_disease	78.02	73.07	4.65	0.8444	built_models/moldata/GraphConv/0921-2134/
activity_588850	Ion channel	78.46	62.15	4.09	0.7751	built_models/moldata/GraphConv/1006-0914/
activity_588850	pulmonary	67.7	79.1	3.44	0.8013	built_models/moldata/GraphConv/0924-2348/
activity_588850	immune system	72.96	73.45	3.82	0.8089	built_models/moldata/GraphConv/0923-1718/
activity_588852	all_disease	60.88	79.86	3.12	0.7886	built_models/moldata/GraphConv/0921-2134/
activity_588852	nervous System	53.06	85.07	2.77	0.7827	built_models/moldata/GraphConv/0921-2135/
activity_588852	Membrane receptor	48.24	85.24	2.52	0.7429	built_models/moldata/GraphConv/1006-0146/
activity_588852	all_target	49.78	87.85	2.67	0.7732	built_models/moldata/GraphConv/1006-0146/
activity_602123	aging	79.41	44.92	1.38	0.6708	built_models/moldata/GraphConv/0925-0951/
activity_602123	all_disease	65.46	67.8	1.23	0.7363	built_models/moldata/GraphConv/0921-2134/
activity_602123	cardiovascular	59.52	69.49	1.07	0.7157	built_models/moldata/GraphConv/0923-1718/
activity_602123	all_target	67.96	67.8	1.32	0.7389	built_models/moldata/GraphConv/1006-0146/
activity_602123	cancer	66.19	69.92	1.29	0.7359	built_models/moldata/GraphConv/0921-2134/
activity_602123	nervous System	57.87	70.76	1.05	0.7164	built_models/moldata/GraphConv/0921-2135/
activity_602123	Protease	63.5	66.1	1.13	0.7027	built_models/moldata/GraphConv/1006-0416/
activity_602141	pulmonary	89.63	50.65	3.06	0.8089	built_models/moldata/GraphConv/0924-2348/
activity_602141	immune system	89.92	51.08	3.17	0.8321	built_models/moldata/GraphConv/0923-1718/
activity_602141	all_disease	91.52	55.84	4.09	0.8545	built_models/moldata/GraphConv/0921-2134/
activity_602162	nervous System	97.94	1.27	0.14	0.5391	built_models/moldata/GraphConv/0921-2135/
activity_602162	all_target	96.09	6.33	0.36	0.5642	built_models/moldata/GraphConv/1006-0146/
activity_602162	all_disease	94.76	8.86	0.37	0.5718	built_models/moldata/GraphConv/0921-2134/
activity_602162	cancer	95.91	5.06	0.27	0.5683	built_models/moldata/GraphConv/0921-2134/
activity_602162	bacteria	95.9	1.27	0.07	0.5009	built_models/moldata/GraphConv/0924-1339/
activity_602162	Transporter	96.95	1.27	0.09	0.5054	built_models/moldata/GraphConv/1006-1140/
activity_602162	cardiovascular	96.76	7.59	0.52	0.5703	built_models/moldata/GraphConv/0923-1718/
activity_602163	Oxidoreductase	80.12	34.68	0.58	0.6145	built_models/moldata/GraphConv/1006-0906/
activity_602163	pulmonary	31.38	74.19	0.36	0.5882	built_models/moldata/GraphConv/0924-2348/
activity_602163	all_disease	29.91	79.84	0.38	0.6133	built_models/moldata/GraphConv/0921-2134/
activity_602163	all_target	30	81.45	0.38	0.5821	built_models/moldata/GraphConv/1006-0146/
activity_602163	cardiovascular	35.7	73.39	0.38	0.5945	built_models/moldata/GraphConv/0923-1718/
activity_602163	nervous System	46.14	62.1	0.38	0.5687	built_models/moldata/GraphConv/0921-2135/
activity_602179	Oxidoreductase	72.95	66.04	0.37	0.7931	built_models/moldata/GraphConv/1006-0906/
activity_602179	all_disease	77.69	67.92	0.46	0.8408	built_models/moldata/GraphConv/0921-2134/
activity_602179	all_target	80	71.7	0.54	0.8376	built_models/moldata/GraphConv/1006-0146/
activity_602179	cancer	78.4	64.15	0.45	0.7954	built_models/moldata/GraphConv/0921-2134/
activity_602229	all_target	75.55	63.55	1.4	0.7822	built_models/moldata/GraphConv/1006-0146/
activity_602229	nervous System	78.34	50.25	1.26	0.7274	built_models/moldata/GraphConv/0921-2135/
activity_602229	all_disease	74.57	60.59	1.28	0.7509	built_models/moldata/GraphConv/0921-2134/
activity_602229	Nuclear receptor	70.46	58.13	1.06	0.7129	built_models/moldata/GraphConv/1006-0423/
activity_602233	Enzyme (other)	78.94	87.5	0.2	0.9527	built_models/moldata/GraphConv/1006-0146/
activity_602233	all_disease	77.47	93.75	0.2	0.9542	built_models/moldata/GraphConv/0921-2134/
activity_602233	all_target	79.22	93.75	0.21	0.9495	built_models/moldata/GraphConv/1006-0146/
activity_602233	parasite	86.61	75	0.26	0.9276	built_models/moldata/GraphConv/0924-1340/
activity_602244	cancer	85.11	62.44	2.36	0.8084	built_models/moldata/GraphConv/0921-2134/
activity_602244	Membrane receptor	81.36	60.56	1.83	0.7861	built_models/moldata/GraphConv/1006-0146/
activity_602244	all_disease	83.82	63.85	2.22	0.8139	built_models/moldata/GraphConv/0921-2134/
activity_602244	all_target	86.55	59.62	2.5	0.8132	built_models/moldata/GraphConv/1006-0146/
activity_602247	all_disease	87.11	30.43	0.15	0.6893	built_models/moldata/GraphConv/0921-2134/
activity_602247	nervous System	89.25	26.09	0.15	0.664	built_models/moldata/GraphConv/0921-2135/
activity_602248	all_disease	70.64	53.07	0.86	0.6768	built_models/moldata/GraphConv/0921-2134/
activity_602248	nervous System	59.06	64.25	0.75	0.6569	built_models/moldata/GraphConv/0921-2135/
activity_602250	nervous System	61.25	50.97	0.91	0.5973	built_models/moldata/GraphConv/0921-2135/
activity_602250	all_disease	58.51	52.12	0.87	0.5705	built_models/moldata/GraphConv/0921-2134/
activity_602261	cancer	86.48	69.52	3.61	0.8846	built_models/moldata/GraphConv/0921-2134/
activity_602261	all_disease	88.34	72.49	4.34	0.9024	built_models/moldata/GraphConv/0921-2134/
activity_602261	Transferase	83.79	68.4	2.98	0.8588	built_models/moldata/GraphConv/1006-0910/
activity_602261	all_target	84.17	76.58	3.39	0.8865	built_models/moldata/GraphConv/1006-0146/
activity_602274	all_disease	22.43	88.89	0.08	0.6506	built_models/moldata/GraphConv/0921-2134/
activity_602274	immune system	19.8	85.19	0.08	0.525	built_models/moldata/GraphConv/0923-1718/
activity_602281	Transferase	74.34	82.25	3.92	0.8465	built_models/moldata/GraphConv/1006-0910/
activity_602281	all_target	63.65	90.19	3.05	0.8775	built_models/moldata/GraphConv/1006-0146/
activity_602281	cardiovascular	59.99	90.19	2.77	0.8466	built_models/moldata/GraphConv/0923-1718/
activity_602281	obesity	51.98	87.68	2.26	0.8007	built_models/moldata/GraphConv/0924-0333/
activity_602281	all_disease	62.66	90.61	2.98	0.8799	built_models/moldata/GraphConv/0921-2134/
activity_602310	virus	85.19	66.67	0.55	0.8657	built_models/moldata/GraphConv/0924-0334/
activity_602310	all_target	85.99	62.22	0.54	0.8461	built_models/moldata/GraphConv/1006-0146/
activity_602310	all_disease	78.74	77.78	0.45	0.8612	built_models/moldata/GraphConv/0921-2134/
activity_602310	Hydrolase	74.2	80	0.38	0.819	built_models/moldata/GraphConv/1006-0419/
activity_602313	Hydrolase	62.78	90	0.79	0.8711	built_models/moldata/GraphConv/1006-0419/
activity_602313	virus	80.75	83.64	1.42	0.8972	built_models/moldata/GraphConv/0924-0334/
activity_602313	all_target	78.35	88.18	1.33	0.8979	built_models/moldata/GraphConv/1006-0146/
activity_602313	all_disease	80.65	87.27	1.47	0.9092	built_models/moldata/GraphConv/0921-2134/
activity_602329	cancer	89.2	92.31	1.82	0.9534	built_models/moldata/GraphConv/0921-2134/
activity_602329	Enzyme (other)	84.86	92.31	1.3	0.9411	built_models/moldata/GraphConv/1006-0146/
activity_602329	all_disease	81.89	89.23	1.06	0.9513	built_models/moldata/GraphConv/0921-2134/
activity_602329	all_target	79.81	92.31	0.98	0.9535	built_models/moldata/GraphConv/1006-0146/
activity_602332	immune system	89.08	10	0.02	0.5897	built_models/moldata/GraphConv/0923-1718/
activity_602332	nervous System	90.92	10	0.03	0.6207	built_models/moldata/GraphConv/0921-2135/
activity_602332	obesity	91.13	10	0.03	0.6022	built_models/moldata/GraphConv/0924-0333/
activity_602332	cardiovascular	89.02	10	0.02	0.6048	built_models/moldata/GraphConv/0923-1718/
activity_602332	diabetes	87.77	10	0.02	0.4895	built_models/moldata/GraphConv/0924-0334/
activity_602332	all_disease	96	10	0.06	0.594	built_models/moldata/GraphConv/0921-2134/
activity_602340	toxicity	95.56	3.74	1.29	0.528	built_models/moldata/GraphConv/0923-1718/
activity_602340	obesity	97.13	0.62	0.42	0.5161	built_models/moldata/GraphConv/0924-0333/
activity_602340	all_disease	95.33	4.36	1.4	0.5312	built_models/moldata/GraphConv/0921-2134/
activity_602342	cancer	70.87	61.8	0.65	0.7115	built_models/moldata/GraphConv/0921-2134/
activity_602342	all_disease	69.27	50.56	0.5	0.6696	built_models/moldata/GraphConv/0921-2134/
activity_602342	virus	71.12	47.19	0.5	0.6538	built_models/moldata/GraphConv/0924-0334/
activity_602346	virus	41.12	70.47	0.53	0.6164	built_models/moldata/GraphConv/0924-0334/
activity_602346	all_disease	46.82	71.81	0.6	0.6288	built_models/moldata/GraphConv/0921-2134/
activity_602393	cancer	79.17	72.47	7.46	0.845	built_models/moldata/GraphConv/0921-2134/
activity_602393	Epigenetic regulator	77.71	70.92	6.86	0.8291	built_models/moldata/GraphConv/1006-0641/
activity_602393	all_target	75.41	80.25	6.95	0.8493	built_models/moldata/GraphConv/1006-0146/
activity_602393	all_disease	74.85	79.32	6.74	0.8494	built_models/moldata/GraphConv/0921-2134/
activity_602396	cancer	88.6	55.77	1.34	0.817	built_models/moldata/GraphConv/0921-2134/
activity_602396	Nuclear receptor	78.47	44.23	0.56	0.7335	built_models/moldata/GraphConv/1006-0423/
activity_602396	all_disease	91.21	55.77	1.73	0.852	built_models/moldata/GraphConv/0921-2134/
activity_602396	all_target	92.11	48.08	1.67	0.8471	built_models/moldata/GraphConv/1006-0146/
activity_602399	bacteria	72.35	82.89	4.33	0.852	built_models/moldata/GraphConv/0924-1339/
activity_602399	all_target	78.11	87.7	5.7	0.9037	built_models/moldata/GraphConv/1006-0146/
activity_602399	all_disease	78.29	86.45	5.67	0.903	built_models/moldata/GraphConv/0921-2134/
activity_602399	Transferase	82.28	76.83	6.21	0.8735	built_models/moldata/GraphConv/1006-0910/
activity_602405	all_disease	54.56	58.54	0.18	0.5969	built_models/moldata/GraphConv/0921-2134/
activity_602405	bacteria	55.02	63.41	0.19	0.5987	built_models/moldata/GraphConv/0924-1339/
activity_602410	pulmonary	72.51	72.11	2.57	0.7835	built_models/moldata/GraphConv/0924-2348/
activity_602410	nervous System	85.03	54.9	3.62	0.8081	built_models/moldata/GraphConv/0921-2135/
activity_602410	immune system	77.2	69.73	2.99	0.8098	built_models/moldata/GraphConv/0923-1718/
activity_602410	all_target	83.98	57.86	3.56	0.8169	built_models/moldata/GraphConv/1006-0146/
activity_602410	Ion channel	80.32	56.68	2.84	0.7818	built_models/moldata/GraphConv/1006-0914/
activity_602410	all_disease	81.57	68.55	3.62	0.8358	built_models/moldata/GraphConv/0921-2134/
activity_602410	cardiovascular	70.37	72.11	2.38	0.7905	built_models/moldata/GraphConv/0923-1718/
activity_602429	all_disease	66.47	78.14	1.11	0.8141	built_models/moldata/GraphConv/0921-2134/
activity_602429	cancer	61.54	78.69	0.98	0.8052	built_models/moldata/GraphConv/0921-2134/
activity_602438	nervous System	77.16	33.89	1.41	0.5762	built_models/moldata/GraphConv/0921-2135/
activity_602438	all_disease	83.12	32.21	1.83	0.5981	built_models/moldata/GraphConv/0921-2134/
activity_602438	cardiovascular	77.58	33.61	1.43	0.562	built_models/moldata/GraphConv/0923-1718/
activity_602440	all_target	85.61	67.43	3.72	0.8317	built_models/moldata/GraphConv/1006-0146/
activity_602440	Protease	84.05	62.54	3.13	0.7836	built_models/moldata/GraphConv/1006-0416/
activity_602440	all_disease	84.08	71.66	3.56	0.8448	built_models/moldata/GraphConv/0921-2134/
activity_602440	cancer	82.11	69.38	3.08	0.8109	built_models/moldata/GraphConv/0921-2134/
activity_602449	metabolic disorders	82.56	49.8	3.67	0.7496	built_models/moldata/GraphConv/0924-1336/
activity_602449	all_disease	85.64	56.56	5	0.8273	built_models/moldata/GraphConv/0921-2134/
activity_602449	pulmonary	80.17	54.3	3.5	0.7669	built_models/moldata/GraphConv/0924-2348/
activity_602481	all_target	83.82	58.33	0.44	0.7844	built_models/moldata/GraphConv/1006-0146/
activity_602481	Transferase	89.8	47.22	0.57	0.7873	built_models/moldata/GraphConv/1006-0910/
activity_602481	all_disease	80.01	63.89	0.39	0.7944	built_models/moldata/GraphConv/0921-2134/
activity_602481	bacteria	86.85	44.44	0.41	0.7729	built_models/moldata/GraphConv/0924-1339/
activity_623870	nervous System	75.61	78.47	3.33	0.8367	built_models/moldata/GraphConv/0921-2135/
activity_623870	cardiovascular	75.23	75.92	3.18	0.8402	built_models/moldata/GraphConv/0923-1718/
activity_623870	all_disease	80.26	79.6	4.14	0.881	built_models/moldata/GraphConv/0921-2134/
activity_623877	all_target	52.5	61.11	0.49	0.6048	built_models/moldata/GraphConv/1006-0146/
activity_623877	Ion channel	58.19	46.83	0.43	0.527	built_models/moldata/GraphConv/1006-0914/
activity_623877	all_disease	55.21	62.7	0.53	0.6304	built_models/moldata/GraphConv/0921-2134/
activity_623877	nervous System	54.45	60.32	0.51	0.6148	built_models/moldata/GraphConv/0921-2135/
activity_623877	cardiovascular	54.77	57.94	0.49	0.5943	built_models/moldata/GraphConv/0923-1718/
activity_623901	virus	93.44	21.28	0.53	0.6571	built_models/moldata/GraphConv/0924-0334/
activity_623901	cancer	95.06	12.77	0.43	0.6327	built_models/moldata/GraphConv/0921-2134/
activity_623901	all_disease	95.71	19.15	0.74	0.6692	built_models/moldata/GraphConv/0921-2134/
activity_624037	nervous System	80.01	75.86	0.86	0.8406	built_models/moldata/GraphConv/0921-2135/
activity_624037	Membrane receptor	73.32	75.86	0.65	0.8283	built_models/moldata/GraphConv/1006-0146/
activity_624037	all_target	66.9	82.76	0.57	0.8417	built_models/moldata/GraphConv/1006-0146/
activity_624037	all_disease	80.13	66.67	0.77	0.8284	built_models/moldata/GraphConv/0921-2134/
activity_624038	all_target	83.98	18.75	0.4	0.5382	built_models/moldata/GraphConv/1006-0146/
activity_624038	all_disease	75.4	28.12	0.39	0.5516	built_models/moldata/GraphConv/0921-2134/
activity_624038	Membrane receptor	89.16	11.72	0.37	0.5567	built_models/moldata/GraphConv/1006-0146/
activity_624038	nervous System	78.35	23.44	0.37	0.5284	built_models/moldata/GraphConv/0921-2135/
activity_624040	Membrane receptor	68.56	65.16	1.32	0.7407	built_models/moldata/GraphConv/1006-0146/
activity_624040	all_target	69.7	74.59	1.57	0.7853	built_models/moldata/GraphConv/1006-0146/
activity_624040	nervous System	74.19	65.57	1.62	0.7694	built_models/moldata/GraphConv/0921-2135/
activity_624040	all_disease	75.52	64.75	1.69	0.7677	built_models/moldata/GraphConv/0921-2134/
activity_624125	Membrane receptor	69.52	63.27	2.12	0.7384	built_models/moldata/GraphConv/1006-0146/
activity_624125	all_target	77.98	62.76	2.91	0.7818	built_models/moldata/GraphConv/1006-0146/
activity_624125	nervous System	75.14	63.01	2.59	0.7653	built_models/moldata/GraphConv/0921-2135/
activity_624125	all_disease	82.65	59.18	3.49	0.7731	built_models/moldata/GraphConv/0921-2134/
activity_624126	Membrane receptor	31.16	72.44	0.43	0.5488	built_models/moldata/GraphConv/1006-0146/
activity_624126	all_disease	23.47	84.62	0.45	0.5686	built_models/moldata/GraphConv/0921-2134/
activity_624126	all_target	23.38	84.62	0.45	0.5763	built_models/moldata/GraphConv/1006-0146/
activity_624126	nervous System	29.7	82.05	0.48	0.5805	built_models/moldata/GraphConv/0921-2135/
activity_624127	all_target	70.98	71.43	0.41	0.8086	built_models/moldata/GraphConv/1006-0146/
activity_624127	all_disease	75.88	66.67	0.46	0.7731	built_models/moldata/GraphConv/0921-2134/
activity_624127	Membrane receptor	70.47	71.43	0.4	0.7839	built_models/moldata/GraphConv/1006-0146/
activity_624127	nervous System	77.2	58.73	0.43	0.7758	built_models/moldata/GraphConv/0921-2135/
activity_624168	nervous System	70.32	48.28	0.37	0.6636	built_models/moldata/GraphConv/0921-2135/
activity_624168	Enzyme (other)	55.37	57.47	0.29	0.5933	built_models/moldata/GraphConv/1006-0146/
activity_624168	all_target	65.88	62.07	0.42	0.6821	built_models/moldata/GraphConv/1006-0146/
activity_624168	all_disease	71.17	57.47	0.46	0.7009	built_models/moldata/GraphConv/0921-2134/
activity_624169	all_target	46.16	65.77	0.83	0.5886	built_models/moldata/GraphConv/1006-0146/
activity_624169	Membrane receptor	44.93	66.15	0.82	0.5766	built_models/moldata/GraphConv/1006-0146/
activity_624169	all_disease	43.58	69.62	0.84	0.5998	built_models/moldata/GraphConv/0921-2134/
activity_624169	nervous System	46.31	66.15	0.84	0.5797	built_models/moldata/GraphConv/0921-2135/
activity_624170	Hydrolase	71.5	76.7	0.74	0.8332	built_models/moldata/GraphConv/1006-0419/
activity_624170	immune system	67.39	77.67	0.65	0.823	built_models/moldata/GraphConv/0923-1718/
activity_624170	toxicity	73.37	75.73	0.78	0.8413	built_models/moldata/GraphConv/0923-1718/
activity_624170	nervous System	73.08	75.73	0.77	0.8156	built_models/moldata/GraphConv/0921-2135/
activity_624170	cancer	72.56	85.44	0.85	0.8486	built_models/moldata/GraphConv/0921-2134/
activity_624170	all_target	72.88	79.61	0.81	0.8564	built_models/moldata/GraphConv/1006-0146/
activity_624170	all_disease	76.37	81.55	0.95	0.8523	built_models/moldata/GraphConv/0921-2134/
activity_624171	Transcription factor	69.1	83.33	1.05	0.8526	built_models/moldata/GraphConv/1006-0649/
activity_624171	cancer	63.07	87.5	0.92	0.8561	built_models/moldata/GraphConv/0921-2134/
activity_624171	obesity	72.73	83.33	1.19	0.8426	built_models/moldata/GraphConv/0924-0333/
activity_624171	nervous System	71.46	81.25	1.11	0.8437	built_models/moldata/GraphConv/0921-2135/
activity_624171	cardiovascular	70.49	79.86	1.05	0.8409	built_models/moldata/GraphConv/0923-1718/
activity_624171	all_target	72.99	84.72	1.22	0.883	built_models/moldata/GraphConv/1006-0146/
activity_624171	diabetes	72.95	80.56	1.16	0.8488	built_models/moldata/GraphConv/0924-0334/
activity_624171	all_disease	74.45	87.5	1.33	0.8858	built_models/moldata/GraphConv/0921-2134/
activity_624171	immune system	74.07	81.25	1.22	0.8475	built_models/moldata/GraphConv/0923-1718/
activity_624172	all_target	92.85	0	0	0.3082	built_models/moldata/GraphConv/1006-0146/
activity_624172	all_disease	93.02	0	0	0.481	built_models/moldata/GraphConv/0921-2134/
activity_624172	diabetes	93.16	0	0	0.2795	built_models/moldata/GraphConv/0924-0334/
activity_624172	immune system	93.79	0	0	0.3234	built_models/moldata/GraphConv/0923-1718/
activity_624172	Membrane receptor	96.02	0	0	0.2365	built_models/moldata/GraphConv/1006-0146/
activity_624172	obesity	91.4	0	0	0.3221	built_models/moldata/GraphConv/0924-0333/
activity_624172	nervous System	89.47	0	0	0.2257	built_models/moldata/GraphConv/0921-2135/
activity_624173	all_disease	89.78	86.49	1.65	0.9307	built_models/moldata/GraphConv/0921-2134/
activity_624173	parasite	88.49	77.03	1.31	0.9132	built_models/moldata/GraphConv/0924-1340/
activity_624202	cancer	78.68	73.03	3.53	0.841	built_models/moldata/GraphConv/0921-2134/
activity_624202	all_disease	75.02	84.48	3.47	0.8606	built_models/moldata/GraphConv/0921-2134/
activity_624202	Enzyme (other)	73.07	75.83	2.91	0.8105	built_models/moldata/GraphConv/1006-0146/
activity_624202	all_target	75.38	82.95	3.46	0.8541	built_models/moldata/GraphConv/1006-0146/
activity_624204	Protease	61.12	90.1	0.61	0.8497	built_models/moldata/GraphConv/1006-0416/
activity_624204	cancer	73.03	84.16	0.82	0.8589	built_models/moldata/GraphConv/0921-2134/
activity_624204	all_target	79.8	82.18	1.07	0.8762	built_models/moldata/GraphConv/1006-0146/
activity_624204	all_disease	75.91	85.15	0.93	0.882	built_models/moldata/GraphConv/0921-2134/
activity_624246	cancer	89.4	50	0.09	0.7797	built_models/moldata/GraphConv/0921-2134/
activity_624246	all_disease	90.81	50	0.1	0.7758	built_models/moldata/GraphConv/0921-2134/
activity_624256	cancer	63.68	66.87	2.41	0.707	built_models/moldata/GraphConv/0921-2134/
activity_624256	all_disease	65.91	64.4	2.48	0.7108	built_models/moldata/GraphConv/0921-2134/
activity_624263	all_disease	87.77	71.29	1.54	0.8812	built_models/moldata/GraphConv/0921-2134/
activity_624263	nervous System	80.36	69.31	0.94	0.819	built_models/moldata/GraphConv/0921-2135/
activity_624267	Kinase	83.82	52.11	1.81	0.7273	built_models/moldata/GraphConv/1006-0645/
activity_624267	bacteria	73.92	66.67	1.42	0.7538	built_models/moldata/GraphConv/0924-1339/
activity_624267	all_target	82.16	71.36	2.22	0.8317	built_models/moldata/GraphConv/1006-0146/
activity_624267	all_disease	84.05	70.42	2.44	0.8338	built_models/moldata/GraphConv/0921-2134/
activity_624267	immune system	84.87	68.08	2.49	0.8203	built_models/moldata/GraphConv/0923-1718/
activity_624268	Enzyme (other)	40.72	93.39	0.5	0.8545	built_models/moldata/GraphConv/1006-0146/
activity_624268	all_target	55.15	89.26	0.63	0.8512	built_models/moldata/GraphConv/1006-0146/
activity_624268	all_disease	54.17	90.08	0.62	0.8541	built_models/moldata/GraphConv/0921-2134/
activity_624268	parasite	59.03	89.26	0.69	0.8514	built_models/moldata/GraphConv/0924-1340/
activity_624287	epigenetics_genetics	67.93	77.36	0.43	0.7695	built_models/moldata/GraphConv/0924-2345/
activity_624287	all_disease	66.78	86.79	0.47	0.8248	built_models/moldata/GraphConv/0921-2134/
activity_624288	epigenetics_genetics	71.56	53.21	0.9	0.6894	built_models/moldata/GraphConv/0924-2345/
activity_624288	all_disease	72.07	66.67	1.14	0.7619	built_models/moldata/GraphConv/0921-2134/
activity_624291	cancer	83.22	15.38	0.04	0.5626	built_models/moldata/GraphConv/0921-2134/
activity_624291	all_disease	75.42	23.08	0.04	0.607	built_models/moldata/GraphConv/0921-2134/
activity_624291	cardiovascular	75.31	23.08	0.04	0.4756	built_models/moldata/GraphConv/0923-1718/
activity_624291	epigenetics_genetics	77.72	15.38	0.03	0.5088	built_models/moldata/GraphConv/0924-2345/
activity_624296	cancer	72.72	71.29	10.9	0.7957	built_models/moldata/GraphConv/0921-2134/
activity_624296	all_disease	76.71	70.36	12.5	0.8089	built_models/moldata/GraphConv/0921-2134/
activity_624297	cancer	74.93	70.13	6.8	0.7943	built_models/moldata/GraphConv/0921-2134/
activity_624297	all_disease	79.35	67.18	7.9	0.8102	built_models/moldata/GraphConv/0921-2134/
activity_624304	all_disease	84.31	47.92	1.93	0.705	built_models/moldata/GraphConv/0921-2134/
activity_624304	parasite	75.63	57.08	1.48	0.7177	built_models/moldata/GraphConv/0924-1340/
activity_624352	all_target	78.67	71.8	3.66	0.8391	built_models/moldata/GraphConv/1006-0146/
activity_624352	nervous System	77.25	70.85	3.39	0.8148	built_models/moldata/GraphConv/0921-2135/
activity_624352	all_disease	71.98	79.86	3.1	0.836	built_models/moldata/GraphConv/0921-2134/
activity_624352	cancer	78.74	70.38	3.6	0.8245	built_models/moldata/GraphConv/0921-2134/
activity_624352	cardiovascular	60.96	79.15	2.22	0.7762	built_models/moldata/GraphConv/0923-1718/
activity_624352	Transcription factor	79.41	66.35	3.52	0.8092	built_models/moldata/GraphConv/1006-0649/
activity_624354	Membrane receptor	74.39	70.11	3.69	0.7768	built_models/moldata/GraphConv/1006-0146/
activity_624354	all_target	80.34	72.8	4.94	0.8435	built_models/moldata/GraphConv/1006-0146/
activity_624354	cancer	79.27	71.84	4.63	0.8361	built_models/moldata/GraphConv/0921-2134/
activity_624354	all_disease	78.81	76.05	4.78	0.846	built_models/moldata/GraphConv/0921-2134/
activity_624377	nervous System	61.85	74	0.51	0.7709	built_models/moldata/GraphConv/0921-2135/
activity_624377	cancer	61.96	79	0.54	0.7983	built_models/moldata/GraphConv/0921-2134/
activity_624377	epigenetics_genetics	59.71	70	0.46	0.7318	built_models/moldata/GraphConv/0924-2345/
activity_624377	all_disease	49.82	87	0.45	0.7963	built_models/moldata/GraphConv/0921-2134/
activity_624414	all_disease	85.67	71.93	0.76	0.8716	built_models/moldata/GraphConv/0921-2134/
activity_624414	all_target	86.82	70.18	0.8	0.8658	built_models/moldata/GraphConv/1006-0146/
activity_624414	Ion channel	89.99	61.4	0.92	0.8395	built_models/moldata/GraphConv/1006-0914/
activity_624414	nervous System	89.05	68.42	0.94	0.8535	built_models/moldata/GraphConv/0921-2135/
activity_624414	metabolic disorders	86.93	64.91	0.75	0.8299	built_models/moldata/GraphConv/0924-1336/
activity_624415	Ion channel	43.87	50	0.01	0.4665	built_models/moldata/GraphConv/1006-0914/
activity_624415	all_target	58.88	0	0	0.1595	built_models/moldata/GraphConv/1006-0146/
activity_624415	all_disease	58.64	0	0	0.27	built_models/moldata/GraphConv/0921-2134/
activity_624415	nervous System	47.06	50	0.01	0.2679	built_models/moldata/GraphConv/0921-2135/
activity_624415	metabolic disorders	47.04	0	0	0.2484	built_models/moldata/GraphConv/0924-1336/
activity_624416	all_disease	94.66	36.55	2.66	0.8121	built_models/moldata/GraphConv/0921-2134/
activity_624416	virus	97.52	25.52	4.24	0.7944	built_models/moldata/GraphConv/0924-0334/
activity_624417	all_target	84.25	60.69	8.15	0.8169	built_models/moldata/GraphConv/1006-0146/
activity_624417	all_disease	89.33	51.12	10.38	0.8322	built_models/moldata/GraphConv/0921-2134/
activity_624417	immune system	83.07	61.43	7.67	0.8144	built_models/moldata/GraphConv/0923-1718/
activity_624417	nervous System	88.38	50.67	9.47	0.818	built_models/moldata/GraphConv/0921-2135/
activity_624417	Membrane receptor	78.96	65.92	6.6	0.8049	built_models/moldata/GraphConv/1006-0146/
activity_624417	diabetes	76.81	66.67	6.07	0.7949	built_models/moldata/GraphConv/0924-0334/
activity_624417	obesity	77.02	68.91	6.3	0.81	built_models/moldata/GraphConv/0924-0333/
activity_624418	all_disease	85.66	66.67	1.19	0.8594	built_models/moldata/GraphConv/0921-2134/
activity_624418	immune system	89.93	55.91	1.43	0.826	built_models/moldata/GraphConv/0923-1718/
activity_624418	nervous System	82.48	69.89	1.03	0.8197	built_models/moldata/GraphConv/0921-2135/
activity_624418	diabetes	87	56.99	1.13	0.814	built_models/moldata/GraphConv/0924-0334/
activity_624418	obesity	84.62	60.22	1.01	0.7873	built_models/moldata/GraphConv/0924-0333/
activity_624463	Membrane receptor	86.45	73.6	1.8	0.8878	built_models/moldata/GraphConv/1006-0146/
activity_624463	all_target	91.78	70.4	2.82	0.9115	built_models/moldata/GraphConv/1006-0146/
activity_624463	nervous System	89.19	74.4	2.27	0.9037	built_models/moldata/GraphConv/0921-2135/
activity_624463	all_disease	87.68	78.4	2.1	0.921	built_models/moldata/GraphConv/0921-2134/
activity_624464	Membrane receptor	85.03	69.32	1.11	0.857	built_models/moldata/GraphConv/1006-0146/
activity_624464	all_target	90.27	67.05	1.65	0.8876	built_models/moldata/GraphConv/1006-0146/
activity_624464	nervous System	86.83	71.59	1.31	0.8564	built_models/moldata/GraphConv/0921-2135/
activity_624464	all_disease	86.2	73.86	1.28	0.8681	built_models/moldata/GraphConv/0921-2134/
activity_624465	all_disease	60.75	88.24	0.1	0.8771	built_models/moldata/GraphConv/0921-2134/
activity_624465	nervous System	65.04	82.35	0.11	0.8074	built_models/moldata/GraphConv/0921-2135/
activity_624465	Membrane receptor	65.19	82.35	0.11	0.7834	built_models/moldata/GraphConv/1006-0146/
activity_624465	all_target	64.42	82.35	0.11	0.8333	built_models/moldata/GraphConv/1006-0146/
activity_624466	all_target	70.25	73.18	4.75	0.7878	built_models/moldata/GraphConv/1006-0146/
activity_624466	nervous System	59.93	81.37	3.92	0.7762	built_models/moldata/GraphConv/0921-2135/
activity_624466	Membrane receptor	51.79	84.94	3.41	0.7591	built_models/moldata/GraphConv/1006-0146/
activity_624466	all_disease	65.19	81.37	4.49	0.7989	built_models/moldata/GraphConv/0921-2134/
activity_624467	all_target	70.22	67.95	2.6	0.7765	built_models/moldata/GraphConv/1006-0146/
activity_624467	all_disease	81.2	58.41	3.56	0.7949	built_models/moldata/GraphConv/0921-2134/
activity_624467	Membrane receptor	68.91	72.27	2.65	0.7726	built_models/moldata/GraphConv/1006-0146/
activity_624467	nervous System	76.07	65.91	3.14	0.7906	built_models/moldata/GraphConv/0921-2135/
activity_624483	all_disease	96.12	0.07	8.33	0.5969	built_models/moldata/GraphConv/0921-2134/
activity_624483	immune system	96.12	0	0	0.5729	built_models/moldata/GraphConv/0923-1718/
activity_624483	virus	95.97	0.64	11.11	0.5813	built_models/moldata/GraphConv/0924-0334/
activity_624483	cardiovascular	96.04	0.28	8.51	0.5737	built_models/moldata/GraphConv/0923-1718/
activity_624483	cancer	96.14	0.07	20	0.5819	built_models/moldata/GraphConv/0921-2134/
activity_631	obesity	60.63	79.8	0.8	0.7614	built_models/moldata/GraphConv/0924-0333/
activity_631	Epigenetic regulator	48.68	84.85	0.66	0.7708	built_models/moldata/GraphConv/1006-0641/
activity_631	all_disease	49.37	87.88	0.69	0.8115	built_models/moldata/GraphConv/0921-2134/
activity_631	diabetes	60.57	80.81	0.81	0.769	built_models/moldata/GraphConv/0924-0334/
activity_631	Nuclear receptor	51.69	84.85	0.7	0.79	built_models/moldata/GraphConv/1006-0423/
activity_631	cancer	55.85	81.82	0.74	0.7937	built_models/moldata/GraphConv/0921-2134/
activity_631	all_target	54.36	83.84	0.73	0.7834	built_models/moldata/GraphConv/1006-0146/
activity_631	cardiovascular	47.46	83.84	0.63	0.7542	built_models/moldata/GraphConv/0923-1718/
activity_631	immune system	57.85	82.83	0.78	0.781	built_models/moldata/GraphConv/0923-1718/
activity_651550	cancer	98.97	0.65	0.43	0.5778	built_models/moldata/GraphConv/0921-2134/
activity_651550	Kinase	99.48	0	0	0.5628	built_models/moldata/GraphConv/1006-0645/
activity_651550	all_disease	98.7	2.6	1.19	0.585	built_models/moldata/GraphConv/0921-2134/
activity_651550	all_target	98.97	0	0	0.5838	built_models/moldata/GraphConv/1006-0146/
activity_651560	Phosphatase	84.36	75.76	2.08	0.8774	built_models/moldata/GraphConv/1006-1129/
activity_651560	immune system	89.4	63.03	2.56	0.8539	built_models/moldata/GraphConv/0923-1718/
activity_651560	all_disease	79.82	85.45	1.81	0.8965	built_models/moldata/GraphConv/0921-2134/
activity_651560	obesity	88.67	62.42	2.37	0.8602	built_models/moldata/GraphConv/0924-0333/
activity_651560	diabetes	84.37	64.85	1.79	0.8445	built_models/moldata/GraphConv/0924-0334/
activity_651560	all_target	82.64	84.85	2.09	0.9023	built_models/moldata/GraphConv/1006-0146/
activity_651560	cardiovascular	84.83	69.09	1.96	0.8549	built_models/moldata/GraphConv/0923-1718/
activity_651572	all_disease	75.93	65.35	0.72	0.7903	built_models/moldata/GraphConv/0921-2134/
activity_651572	epigenetics_genetics	85.53	55.45	1.02	0.778	built_models/moldata/GraphConv/0924-2345/
activity_651572	nervous System	83.24	58.42	0.92	0.7686	built_models/moldata/GraphConv/0921-2135/
activity_651572	cancer	84.75	60.4	1.05	0.8047	built_models/moldata/GraphConv/0921-2134/
activity_651582	diabetes	75.14	60.16	2.4	0.7438	built_models/moldata/GraphConv/0924-0334/
activity_651582	immune system	80.35	60.16	3.04	0.781	built_models/moldata/GraphConv/0923-1718/
activity_651582	all_disease	80.25	64.14	3.21	0.7992	built_models/moldata/GraphConv/0921-2134/
activity_651582	obesity	71.22	69.32	2.38	0.7566	built_models/moldata/GraphConv/0924-0333/
activity_651602	bacteria	73.62	81.29	1.12	0.8437	built_models/moldata/GraphConv/0924-1339/
activity_651602	Enzyme (other)	73.02	83.45	1.12	0.8658	built_models/moldata/GraphConv/1006-0146/
activity_651602	all_target	80.91	77.7	1.47	0.8712	built_models/moldata/GraphConv/1006-0146/
activity_651602	all_disease	78	84.89	1.39	0.8813	built_models/moldata/GraphConv/0921-2134/
activity_651610	all_disease	90	26.97	4.31	0.7056	built_models/moldata/GraphConv/0921-2134/
activity_651610	virus	83.53	33.77	3.14	0.6745	built_models/moldata/GraphConv/0924-0334/
activity_651635	all_disease	79.58	80.18	6.29	0.875	built_models/moldata/GraphConv/0921-2134/
activity_651635	nervous System	72.89	80.35	4.8	0.8446	built_models/moldata/GraphConv/0921-2135/
activity_651636	Membrane receptor	73.78	72.42	2.37	0.7964	built_models/moldata/GraphConv/1006-0146/
activity_651636	virus	81.12	63.33	2.88	0.8028	built_models/moldata/GraphConv/0924-0334/
activity_651636	all_target	80.02	66.97	2.87	0.8067	built_models/moldata/GraphConv/1006-0146/
activity_651636	immune system	83.3	58.18	3	0.795	built_models/moldata/GraphConv/0923-1718/
activity_651636	all_disease	86.61	56.36	3.63	0.8111	built_models/moldata/GraphConv/0921-2134/
activity_651640	virus	44.7	70.73	1.98	0.6099	built_models/moldata/GraphConv/0924-0334/
activity_651640	all_disease	40.05	74.61	1.92	0.6214	built_models/moldata/GraphConv/0921-2134/
activity_651644	immune system	89.48	59.43	1.61	0.8731	built_models/moldata/GraphConv/0923-1718/
activity_651644	virus	85.7	71.7	1.43	0.8747	built_models/moldata/GraphConv/0924-0334/
activity_651644	all_disease	86.86	74.53	1.61	0.8997	built_models/moldata/GraphConv/0921-2134/
activity_651647	all_disease	74.47	80.56	0.3	0.8625	built_models/moldata/GraphConv/0921-2134/
activity_651647	Protease	83.57	63.89	0.37	0.81	built_models/moldata/GraphConv/1006-0416/
activity_651647	cancer	85.83	69.44	0.47	0.8488	built_models/moldata/GraphConv/0921-2134/
activity_651647	all_target	78.37	83.33	0.37	0.8575	built_models/moldata/GraphConv/1006-0146/
activity_651654	all_disease	99.13	3.7	0.43	0.7907	built_models/moldata/GraphConv/0921-2134/
activity_651654	fungal	99.26	3.7	0.51	0.7629	built_models/moldata/GraphConv/0925-0953/
activity_651661	cancer	77.03	66.04	2.8	0.7845	built_models/moldata/GraphConv/0921-2134/
activity_651661	all_disease	83.17	61.13	3.54	0.8102	built_models/moldata/GraphConv/0921-2134/
activity_651687	diabetes	93.42	21.52	0.91	0.7005	built_models/moldata/GraphConv/0924-0334/
activity_651687	obesity	84.86	27.85	0.5	0.601	built_models/moldata/GraphConv/0924-0333/
activity_651687	immune system	90.25	26.58	0.75	0.6983	built_models/moldata/GraphConv/0923-1718/
activity_651687	aging	94.14	13.92	0.67	0.6507	built_models/moldata/GraphConv/0925-0951/
activity_651687	all_disease	91.88	40.51	1.37	0.7502	built_models/moldata/GraphConv/0921-2134/
activity_651687	cardiovascular	83.6	35.44	0.59	0.6319	built_models/moldata/GraphConv/0923-1718/
activity_651687	metabolic disorders	90.05	25.32	0.7	0.6567	built_models/moldata/GraphConv/0924-1336/
activity_651699	Transferase	85.96	56.25	2.69	0.8311	built_models/moldata/GraphConv/1006-0910/
activity_651699	cancer	78.52	70.31	2.18	0.8364	built_models/moldata/GraphConv/0921-2134/
activity_651699	all_disease	71.92	81.64	1.93	0.8418	built_models/moldata/GraphConv/0921-2134/
activity_651699	nervous System	84.13	59.38	2.5	0.8356	built_models/moldata/GraphConv/0921-2135/
activity_651699	all_target	83.01	67.19	2.63	0.8498	built_models/moldata/GraphConv/1006-0146/
activity_651699	immune system	80.64	68.75	2.36	0.842	built_models/moldata/GraphConv/0923-1718/
activity_651702	all_disease	78.24	68.83	2.54	0.82	built_models/moldata/GraphConv/0921-2134/
activity_651702	cancer	76.65	64.94	2.24	0.7856	built_models/moldata/GraphConv/0921-2134/
activity_651702	immune system	67.99	73.05	1.83	0.7813	built_models/moldata/GraphConv/0923-1718/
activity_651702	virus	75.01	65.58	2.11	0.7902	built_models/moldata/GraphConv/0924-0334/
activity_651710	all_disease	83.82	82.05	2.82	0.9136	built_models/moldata/GraphConv/0921-2134/
activity_651710	cancer	83.4	80.13	2.69	0.8933	built_models/moldata/GraphConv/0921-2134/
activity_651711	all_disease	61.14	66.67	0.06	0.666	built_models/moldata/GraphConv/0921-2134/
activity_651711	all_target	52.66	88.89	0.06	0.7453	built_models/moldata/GraphConv/1006-0146/
activity_651711	cardiovascular	56.29	66.67	0.05	0.6827	built_models/moldata/GraphConv/0923-1718/
activity_651711	Enzyme (other)	49.7	66.67	0.04	0.6307	built_models/moldata/GraphConv/1006-0146/
activity_651718	nervous System	79	75.71	3.25	0.858	built_models/moldata/GraphConv/0921-2135/
activity_651718	pulmonary	82.17	70.29	3.55	0.856	built_models/moldata/GraphConv/0924-2348/
activity_651718	all_disease	80.94	78.57	3.69	0.8804	built_models/moldata/GraphConv/0921-2134/
activity_651718	cardiovascular	79.33	73.71	3.21	0.8515	built_models/moldata/GraphConv/0923-1718/
activity_651718	all_target	80.08	79.43	3.57	0.8718	built_models/moldata/GraphConv/1006-0146/
activity_651718	Oxidoreductase	84.71	68.57	4.04	0.8563	built_models/moldata/GraphConv/1006-0906/
activity_651719	all_disease	84.2	38.54	1.25	0.6859	built_models/moldata/GraphConv/0921-2134/
activity_651719	Membrane receptor	86.83	28.65	1.13	0.6753	built_models/moldata/GraphConv/1006-0146/
activity_651719	all_target	79.64	47.92	1.2	0.7006	built_models/moldata/GraphConv/1006-0146/
activity_651719	nervous System	82.48	33.85	1	0.6694	built_models/moldata/GraphConv/0921-2135/
activity_651719	metabolic disorders	78.17	38.54	0.91	0.6115	built_models/moldata/GraphConv/0924-1336/
activity_651723	cardiovascular	85.39	38.2	0.8	0.6873	built_models/moldata/GraphConv/0923-1718/
activity_651723	obesity	81.83	34.83	0.59	0.6645	built_models/moldata/GraphConv/0924-0333/
activity_651723	diabetes	81.14	39.33	0.64	0.6778	built_models/moldata/GraphConv/0924-0334/
activity_651723	all_disease	86.33	38.2	0.86	0.7105	built_models/moldata/GraphConv/0921-2134/
activity_651723	metabolic disorders	91.61	25.84	0.96	0.701	built_models/moldata/GraphConv/0924-1336/
activity_651723	immune system	85.62	37.08	0.79	0.6721	built_models/moldata/GraphConv/0923-1718/
activity_651723	aging	86.09	21.35	0.48	0.641	built_models/moldata/GraphConv/0925-0951/
activity_651724	all_target	85.94	83.05	3.85	0.9102	built_models/moldata/GraphConv/1006-0146/
activity_651724	all_disease	87.11	79.66	4.03	0.9131	built_models/moldata/GraphConv/0921-2134/
activity_651724	Hydrolase	85.34	77.97	3.49	0.8857	built_models/moldata/GraphConv/1006-0419/
activity_651724	cancer	85.53	81.78	3.69	0.9137	built_models/moldata/GraphConv/0921-2134/
activity_651725	cancer	86.03	81.61	4.55	0.9097	built_models/moldata/GraphConv/0921-2134/
activity_651725	all_disease	83.84	85.28	4.11	0.9214	built_models/moldata/GraphConv/0921-2134/
activity_651768	all_disease	88.59	78.01	4.99	0.911	built_models/moldata/GraphConv/0921-2134/
activity_651768	all_target	89.33	75.53	5.17	0.8995	built_models/moldata/GraphConv/1006-0146/
activity_651768	cancer	85.77	77.66	4.01	0.8993	built_models/moldata/GraphConv/0921-2134/
activity_651768	Enzyme (other)	79.51	80.85	2.92	0.881	built_models/moldata/GraphConv/1006-0146/
activity_651800	immune system	68.33	66.87	0.9	0.7595	built_models/moldata/GraphConv/0923-1718/
activity_651800	Membrane receptor	59.39	71.78	0.75	0.7365	built_models/moldata/GraphConv/1006-0146/
activity_651800	all_disease	67.77	74.85	0.99	0.7835	built_models/moldata/GraphConv/0921-2134/
activity_651800	all_target	78.54	68.1	1.35	0.7911	built_models/moldata/GraphConv/1006-0146/
activity_651800	obesity	77.89	65.03	1.25	0.7753	built_models/moldata/GraphConv/0924-0333/
activity_651800	diabetes	59.56	76.07	0.8	0.7537	built_models/moldata/GraphConv/0924-0334/
activity_651819	all_disease	38.82	54.95	0.27	0.4659	built_models/moldata/GraphConv/0921-2134/
activity_651819	cancer	41	55.86	0.28	0.4956	built_models/moldata/GraphConv/0921-2134/
activity_651820	virus	85.85	49.43	17.54	0.8069	built_models/moldata/GraphConv/0924-0334/
activity_651820	all_disease	84.36	61.25	18.28	0.8363	built_models/moldata/GraphConv/0921-2134/
activity_651821	nervous System	80.22	88.74	5.75	0.9183	built_models/moldata/GraphConv/0921-2135/
activity_651821	all_disease	84.46	89.31	7.26	0.9363	built_models/moldata/GraphConv/0921-2134/
activity_651957	all_disease	84.96	68.29	1.4	0.8381	built_models/moldata/GraphConv/0921-2134/
activity_651957	all_target	85.18	64.23	1.34	0.8409	built_models/moldata/GraphConv/1006-0146/
activity_651957	Nuclear receptor	76.69	68.29	0.91	0.7983	built_models/moldata/GraphConv/1006-0423/
activity_651957	cancer	83.74	61.79	1.18	0.8216	built_models/moldata/GraphConv/0921-2134/
activity_651958	immune system	20.64	96.47	0.78	0.7869	built_models/moldata/GraphConv/0923-1718/
activity_651958	Enzyme (other)	19.67	96.47	0.77	0.746	built_models/moldata/GraphConv/1006-0146/
activity_651958	virus	20.06	95.29	0.76	0.7851	built_models/moldata/GraphConv/0924-0334/
activity_651958	all_target	25.71	95.69	0.82	0.8009	built_models/moldata/GraphConv/1006-0146/
activity_651958	all_disease	24.76	96.08	0.82	0.8174	built_models/moldata/GraphConv/0921-2134/
activity_651965	Protease	72.85	68.15	5.74	0.7633	built_models/moldata/GraphConv/1006-0416/
activity_651965	all_target	82.32	59.24	7.71	0.7744	built_models/moldata/GraphConv/1006-0146/
activity_651965	bacteria	78.59	62.21	6.67	0.7731	built_models/moldata/GraphConv/0924-1339/
activity_651965	all_disease	79.82	61.81	7.03	0.7856	built_models/moldata/GraphConv/0921-2134/
activity_652010	cancer	41.44	87.9	1.52	0.7767	built_models/moldata/GraphConv/0921-2134/
activity_652010	all_target	38.63	90.62	1.49	0.7967	built_models/moldata/GraphConv/1006-0146/
activity_652010	all_disease	44.32	88.64	1.61	0.7907	built_models/moldata/GraphConv/0921-2134/
activity_652010	Nuclear receptor	43.79	86.91	1.56	0.7826	built_models/moldata/GraphConv/1006-0423/
activity_652017	Epigenetic regulator	72.7	52.84	2.06	0.6712	built_models/moldata/GraphConv/1006-0641/
activity_652017	all_target	73.62	54.5	2.2	0.694	built_models/moldata/GraphConv/1006-0146/
activity_652017	epigenetics_genetics	74.63	52.37	2.2	0.6822	built_models/moldata/GraphConv/0924-2345/
activity_652017	all_disease	72.01	59	2.24	0.6922	built_models/moldata/GraphConv/0921-2134/
activity_652017	cancer	73.21	55.21	2.19	0.6904	built_models/moldata/GraphConv/0921-2134/
activity_652025	infection	66.57	96.77	0.24	0.9183	built_models/moldata/GraphConv/0924-2348/
activity_652025	parasite	59.44	100	0.2	0.9056	built_models/moldata/GraphConv/0924-1340/
activity_652025	bacteria	74.3	83.87	0.27	0.8856	built_models/moldata/GraphConv/0924-1339/
activity_652025	all_disease	59.58	90.32	0.18	0.8947	built_models/moldata/GraphConv/0921-2134/
activity_652025	immune system	70.6	90.32	0.25	0.9116	built_models/moldata/GraphConv/0923-1718/
activity_652039	nervous System	59.68	93.16	2.26	0.8664	built_models/moldata/GraphConv/0921-2135/
activity_652039	all_disease	69.38	86.84	2.77	0.8791	built_models/moldata/GraphConv/0921-2134/
activity_652039	all_target	65.98	89.11	2.56	0.8807	built_models/moldata/GraphConv/1006-0146/
activity_652039	Protease	69.83	85.57	2.77	0.8568	built_models/moldata/GraphConv/1006-0416/
activity_652039	cancer	63	92.91	2.45	0.881	built_models/moldata/GraphConv/0921-2134/
activity_652048	Membrane receptor	60.71	65.25	1.12	0.6754	built_models/moldata/GraphConv/1006-0146/
activity_652048	all_disease	67.28	62.55	1.29	0.6905	built_models/moldata/GraphConv/0921-2134/
activity_652048	nervous System	60.12	66.02	1.11	0.6645	built_models/moldata/GraphConv/0921-2135/
activity_652048	all_target	61.21	67.18	1.16	0.681	built_models/moldata/GraphConv/1006-0146/
activity_652051	all_target	58.93	68.34	1.12	0.6784	built_models/moldata/GraphConv/1006-0146/
activity_652051	Membrane receptor	62.22	63.71	1.14	0.6759	built_models/moldata/GraphConv/1006-0146/
activity_652051	nervous System	59.75	63.71	1.07	0.6555	built_models/moldata/GraphConv/0921-2135/
activity_652051	all_disease	68.37	58.3	1.24	0.6892	built_models/moldata/GraphConv/0921-2134/
activity_652054	Membrane receptor	76.42	61.14	8.31	0.7504	built_models/moldata/GraphConv/1006-0146/
activity_652054	all_disease	77.57	63.57	9	0.7707	built_models/moldata/GraphConv/0921-2134/
activity_652054	nervous System	80.83	60.55	10.07	0.7652	built_models/moldata/GraphConv/0921-2135/
activity_652054	all_target	77.9	62.48	9	0.7715	built_models/moldata/GraphConv/1006-0146/
activity_652067	all_disease	73.21	79.23	4.13	0.8344	built_models/moldata/GraphConv/0921-2134/
activity_652067	Nuclear receptor	78.31	68.94	4.46	0.8197	built_models/moldata/GraphConv/1006-0423/
activity_652067	all_target	74.32	75.22	4.1	0.8256	built_models/moldata/GraphConv/1006-0146/
activity_652067	parasite	75.97	71.9	4.2	0.8178	built_models/moldata/GraphConv/0924-1340/
activity_652104	all_disease	69.58	81.76	4.25	0.8232	built_models/moldata/GraphConv/0921-2134/
activity_652104	toxicity	61.44	81.24	3.35	0.7862	built_models/moldata/GraphConv/0923-1718/
activity_652104	nervous System	67.38	79	3.85	0.807	built_models/moldata/GraphConv/0921-2135/
activity_652104	immune system	60.22	83.65	3.34	0.8027	built_models/moldata/GraphConv/0923-1718/
activity_652105	all_disease	85.21	74.7	8.76	0.8748	built_models/moldata/GraphConv/0921-2134/
activity_652105	Transferase	84.96	69.14	8.09	0.8511	built_models/moldata/GraphConv/1006-0910/
activity_652105	cancer	75.02	82.29	5.79	0.8691	built_models/moldata/GraphConv/0921-2134/
activity_652105	all_target	86.5	72.68	9.34	0.8709	built_models/moldata/GraphConv/1006-0146/
activity_652106	nervous System	42.43	86.44	0.23	0.7413	built_models/moldata/GraphConv/0921-2135/
activity_652106	all_disease	40.05	91.53	0.24	0.7979	built_models/moldata/GraphConv/0921-2134/
[truncated: 409 more rows]

## Sheet: all_disease
AID	run_type	accuracy_score	recall_score	precision_score	roc_auc_score	model_dir
all_disease	all_disease	72.62	67.17	4.46	0.7757	built_models/moldata/GraphConv/0921-2134/
activity_1554	all_disease	78.55	78.82	1.03	0.8697	built_models/moldata/GraphConv/0921-2134/
activity_2732	all_disease	87.64	41.56	12.56	0.7996	built_models/moldata/GraphConv/0921-2134/
activity_1085	all_disease	90.9	60.84	3.43	0.8432	built_models/moldata/GraphConv/0921-2134/
activity_1236	all_disease	77.59	58.56	1.05	0.7441	built_models/moldata/GraphConv/0921-2134/
activity_1274	all_disease	62.97	60.32	1.12	0.679	built_models/moldata/GraphConv/0921-2134/
activity_781	all_disease	74.24	61.36	1.52	0.7243	built_models/moldata/GraphConv/0921-2134/
activity_422	all_disease	76.19	56.76	0.45	0.7533	built_models/moldata/GraphConv/0921-2134/
activity_1224905	all_disease	80.32	82.68	2.55	0.8963	built_models/moldata/GraphConv/0921-2134/
activity_624256	all_disease	65.91	64.4	2.48	0.7108	built_models/moldata/GraphConv/0921-2134/
activity_588358	all_disease	27.03	89.3	0.73	0.6983	built_models/moldata/GraphConv/0921-2134/
activity_1346378	all_disease	57.53	96.25	0.45	0.8811	built_models/moldata/GraphConv/0921-2134/
activity_743266	all_disease	46.44	82.76	0.12	0.6359	built_models/moldata/GraphConv/0921-2134/
activity_624417	all_disease	89.33	51.12	10.38	0.8322	built_models/moldata/GraphConv/0921-2134/
activity_624418	all_disease	85.66	66.67	1.19	0.8594	built_models/moldata/GraphConv/0921-2134/
activity_652104	all_disease	69.58	81.76	4.25	0.8232	built_models/moldata/GraphConv/0921-2134/
activity_602310	all_disease	78.74	77.78	0.45	0.8612	built_models/moldata/GraphConv/0921-2134/
activity_588579	all_disease	90.46	72.19	6.8	0.9064	built_models/moldata/GraphConv/0921-2134/
activity_504847	all_disease	87.62	57.81	7.06	0.815	built_models/moldata/GraphConv/0921-2134/
activity_651635	all_disease	79.58	80.18	6.29	0.875	built_models/moldata/GraphConv/0921-2134/
activity_743255	all_disease	82.58	91.85	2.1	0.9408	built_models/moldata/GraphConv/0921-2134/
activity_588591	all_disease	82.4	80.66	8.17	0.8895	built_models/moldata/GraphConv/0921-2134/
activity_588590	all_disease	71.74	83.3	4.72	0.8516	built_models/moldata/GraphConv/0921-2134/
activity_504845	all_disease	83.07	66.67	0.11	0.7123	built_models/moldata/GraphConv/0921-2134/
activity_504327	all_disease	85.98	61.33	1.97	0.7988	built_models/moldata/GraphConv/0921-2134/
activity_504648	all_disease	88.98	69.35	2.34	0.8814	built_models/moldata/GraphConv/0921-2134/
activity_602313	all_disease	80.65	87.27	1.47	0.9092	built_models/moldata/GraphConv/0921-2134/
activity_624172	all_disease	93.02	0	0	0.481	built_models/moldata/GraphConv/0921-2134/
activity_624246	all_disease	90.81	50	0.1	0.7758	built_models/moldata/GraphConv/0921-2134/
activity_652106	all_disease	40.05	91.53	0.24	0.7979	built_models/moldata/GraphConv/0921-2134/
activity_2676	all_disease	56.14	94.81	0.53	0.8566	built_models/moldata/GraphConv/0921-2134/
activity_652025	all_disease	59.58	90.32	0.18	0.8947	built_models/moldata/GraphConv/0921-2134/
activity_720504	all_disease	82.65	53.97	9.75	0.751	built_models/moldata/GraphConv/0921-2134/
activity_720542	all_disease	78.62	87.62	1.15	0.9013	built_models/moldata/GraphConv/0921-2134/
activity_651725	all_disease	83.84	85.28	4.11	0.9214	built_models/moldata/GraphConv/0921-2134/
activity_651768	all_disease	88.59	78.01	4.99	0.911	built_models/moldata/GraphConv/0921-2134/
activity_504444	all_disease	81.84	60.37	9.96	0.8047	built_models/moldata/GraphConv/0921-2134/
activity_743279	all_disease	83.03	55.44	18.1	0.8046	built_models/moldata/GraphConv/0921-2134/
activity_651644	all_disease	86.86	74.53	1.61	0.8997	built_models/moldata/GraphConv/0921-2134/
activity_651550	all_disease	98.7	2.6	1.19	0.585	built_models/moldata/GraphConv/0921-2134/
activity_1259400	all_disease	76.48	74.47	2.39	0.8332	built_models/moldata/GraphConv/0921-2134/
activity_720551	all_disease	52.48	63.78	0.49	0.6624	built_models/moldata/GraphConv/0921-2134/
activity_720553	all_disease	68.01	68.84	2.11	0.7525	built_models/moldata/GraphConv/0921-2134/
activity_651965	all_disease	79.82	61.81	7.03	0.7856	built_models/moldata/GraphConv/0921-2134/
activity_540263	all_disease	55.27	62.5	0.04	0.7213	built_models/moldata/GraphConv/0921-2134/
activity_485314	all_disease	87.92	61.55	11.09	0.8442	built_models/moldata/GraphConv/0921-2134/
activity_651724	all_disease	87.11	79.66	4.03	0.9131	built_models/moldata/GraphConv/0921-2134/
activity_488837	all_disease	82.8	0	0	0.5786	built_models/moldata/GraphConv/0921-2134/
activity_485353	all_disease	72.33	63.64	0.48	0.7362	built_models/moldata/GraphConv/0921-2134/
activity_540303	all_disease	68.28	69.61	0.72	0.7562	built_models/moldata/GraphConv/0921-2134/
activity_485298	all_disease	70.79	69.23	0.6	0.7677	built_models/moldata/GraphConv/0921-2134/
activity_504706	all_disease	72.28	76.19	0.19	0.8125	built_models/moldata/GraphConv/0921-2134/
activity_485313	all_disease	77.94	86.03	8.2	0.9043	built_models/moldata/GraphConv/0921-2134/
activity_485297	all_disease	76.55	87.43	9.62	0.9028	built_models/moldata/GraphConv/0921-2134/
activity_2551	all_disease	80.91	74.7	21.95	0.8631	built_models/moldata/GraphConv/0921-2134/
activity_2546	all_disease	83.87	66.37	15.88	0.8402	built_models/moldata/GraphConv/0921-2134/
activity_540276	all_disease	84.9	60.64	11.04	0.8253	built_models/moldata/GraphConv/0921-2134/
activity_540256	all_disease	78.96	61.57	6.43	0.7904	built_models/moldata/GraphConv/0921-2134/
activity_2662	all_disease	87.42	68.75	0.29	0.9012	built_models/moldata/GraphConv/0921-2134/
activity_2315	all_disease	69.06	81.89	19.64	0.8306	built_models/moldata/GraphConv/0921-2134/
activity_2675	all_disease	71.25	61.11	0.15	0.6724	built_models/moldata/GraphConv/0921-2134/
activity_2326	all_disease	56.42	75.98	1.15	0.7233	built_models/moldata/GraphConv/0921-2134/
activity_2549	all_disease	71.72	81.03	2.17	0.8555	built_models/moldata/GraphConv/0921-2134/
activity_880	all_disease	53.3	73.81	0.88	0.7322	built_models/moldata/GraphConv/0921-2134/
activity_2147	all_disease	63.77	82.21	4.4	0.8185	built_models/moldata/GraphConv/0921-2134/
activity_485360	all_disease	53.34	89.34	1.96	0.8488	built_models/moldata/GraphConv/0921-2134/
activity_1458	all_disease	87.71	64.94	13.17	0.8552	built_models/moldata/GraphConv/0921-2134/
activity_1487	all_disease	89.8	25	0.11	0.726	built_models/moldata/GraphConv/0921-2134/
activity_445	all_disease	86.65	46.15	0.41	0.6826	built_models/moldata/GraphConv/0921-2134/
activity_1259318	all_disease	89.84	57.45	4.6	0.8542	built_models/moldata/GraphConv/0921-2134/
activity_602429	all_disease	66.47	78.14	1.11	0.8141	built_models/moldata/GraphConv/0921-2134/
activity_624304	all_disease	84.31	47.92	1.93	0.705	built_models/moldata/GraphConv/0921-2134/
activity_624352	all_disease	71.98	79.86	3.1	0.836	built_models/moldata/GraphConv/0921-2134/
activity_651699	all_disease	71.92	81.64	1.93	0.8418	built_models/moldata/GraphConv/0921-2134/
activity_651647	all_disease	74.47	80.56	0.3	0.8625	built_models/moldata/GraphConv/0921-2134/
activity_1347056	all_disease	64.12	75.33	2.93	0.763	built_models/moldata/GraphConv/0921-2134/
activity_588405	all_disease	72.25	81.62	6.98	0.85	built_models/moldata/GraphConv/0921-2134/
activity_588493	all_disease	74.45	72	2.45	0.804	built_models/moldata/GraphConv/0921-2134/
activity_1259313	all_disease	89.81	56.77	12.09	0.8202	built_models/moldata/GraphConv/0921-2134/
activity_489030	all_disease	55.61	91.45	2.13	0.8569	built_models/moldata/GraphConv/0921-2134/
activity_489031	all_disease	44.85	59.52	0.28	0.517	built_models/moldata/GraphConv/0921-2134/
activity_485273	all_disease	75.89	80.98	1.7	0.8505	built_models/moldata/GraphConv/0921-2134/
activity_2071	all_disease	25.83	81.67	0.69	0.6104	built_models/moldata/GraphConv/0921-2134/
activity_485	all_disease	29.42	75.32	0.37	0.5477	built_models/moldata/GraphConv/0921-2134/
activity_1259388	all_disease	80.17	81.25	16.56	0.8571	built_models/moldata/GraphConv/0921-2134/
activity_588692	all_disease	63.46	83.33	0.67	0.7978	built_models/moldata/GraphConv/0921-2134/
activity_720706	all_disease	78.15	46.18	4.86	0.721	built_models/moldata/GraphConv/0921-2134/
activity_602393	all_disease	74.85	79.32	6.74	0.8494	built_models/moldata/GraphConv/0921-2134/
activity_2099	all_disease	42.63	62.86	0.12	0.5764	built_models/moldata/GraphConv/0921-2134/
activity_504621	all_disease	85.51	74.66	2.44	0.8768	built_models/moldata/GraphConv/0921-2134/
activity_1813	all_disease	64.88	83.69	2.57	0.8383	built_models/moldata/GraphConv/0921-2134/
activity_1814	all_disease	76.56	78.22	19.56	0.8488	built_models/moldata/GraphConv/0921-2134/
activity_1662	all_disease	70.43	88.49	4.82	0.8797	built_models/moldata/GraphConv/0921-2134/
activity_2221	all_disease	77.03	76.21	2.54	0.8589	built_models/moldata/GraphConv/0921-2134/
activity_940	all_disease	94.76	27.9	3.92	0.8094	built_models/moldata/GraphConv/0921-2134/
activity_1422	all_disease	64.78	82.34	2.96	0.8077	built_models/moldata/GraphConv/0921-2134/
activity_1021	all_disease	40.65	80.81	1.45	0.7114	built_models/moldata/GraphConv/0921-2134/
activity_1022	all_disease	78.2	73.48	6.02	0.8252	built_models/moldata/GraphConv/0921-2134/
activity_817	all_disease	56.87	48.65	0.23	0.5663	built_models/moldata/GraphConv/0921-2134/
activity_602162	all_disease	94.76	8.86	0.37	0.5718	built_models/moldata/GraphConv/0921-2134/
activity_588499	all_disease	85.28	76.47	1.45	0.895	built_models/moldata/GraphConv/0921-2134/
activity_504490	all_disease	22.16	81.65	0.34	0.5289	built_models/moldata/GraphConv/0921-2134/
activity_488847	all_disease	55.43	58.62	0.83	0.6127	built_models/moldata/GraphConv/0921-2134/
activity_2557	all_disease	71.91	28.79	0.21	0.5229	built_models/moldata/GraphConv/0921-2134/
activity_624170	all_disease	76.37	81.55	0.95	0.8523	built_models/moldata/GraphConv/0921-2134/
activity_624171	all_disease	74.45	87.5	1.33	0.8858	built_models/moldata/GraphConv/0921-2134/
activity_624414	all_disease	85.67	71.93	0.76	0.8716	built_models/moldata/GraphConv/0921-2134/
activity_1347076	all_disease	89.9	18.21	14.48	0.7276	built_models/moldata/GraphConv/0921-2134/
activity_1347075	all_disease	79.65	61.08	6.02	0.8058	built_models/moldata/GraphConv/0921-2134/
activity_624415	all_disease	58.64	0	0	0.27	built_models/moldata/GraphConv/0921-2134/
activity_1347120	all_disease	63.02	89.31	1.1	0.845	built_models/moldata/GraphConv/0921-2134/
activity_504339	all_disease	75.45	74.45	16.1	0.8224	built_models/moldata/GraphConv/0921-2134/
activity_504891	all_disease	85.03	100	0.08	0.9876	built_models/moldata/GraphConv/0921-2134/
activity_540317	all_disease	85.37	79.2	4.35	0.8924	built_models/moldata/GraphConv/0921-2134/
activity_624202	all_disease	75.02	84.48	3.47	0.8606	built_models/moldata/GraphConv/0921-2134/
activity_720707	all_disease	76.4	80.77	0.23	0.8953	built_models/moldata/GraphConv/0921-2134/
activity_720708	all_disease	81.15	65.08	0.58	0.8413	built_models/moldata/GraphConv/0921-2134/
activity_720709	all_disease	64.48	93.62	0.67	0.9153	built_models/moldata/GraphConv/0921-2134/
activity_720711	all_disease	82.81	80.77	0.64	0.8778	built_models/moldata/GraphConv/0921-2134/
activity_504333	all_disease	58.78	86.39	11.49	0.8318	built_models/moldata/GraphConv/0921-2134/
activity_504332	all_disease	78.44	60.78	32.21	0.7782	built_models/moldata/GraphConv/0921-2134/
activity_540253	all_disease	79.51	75	0.36	0.84	built_models/moldata/GraphConv/0921-2134/
activity_504842	all_disease	70.65	92.86	0.14	0.8495	built_models/moldata/GraphConv/0921-2134/
activity_1463	all_disease	89.1	88.03	7.12	0.9571	built_models/moldata/GraphConv/0921-2134/
activity_1461	all_disease	81.14	69.8	4.85	0.8498	built_models/moldata/GraphConv/0921-2134/
activity_1347165	all_disease	93.57	7.22	45.31	0.8036	built_models/moldata/GraphConv/0921-2134/
activity_1457	all_disease	77.62	82.28	1.08	0.8827	built_models/moldata/GraphConv/0921-2134/
activity_2417	all_disease	83.05	13.03	3.99	0.4971	built_models/moldata/GraphConv/0921-2134/
activity_1454	all_disease	71.68	73.81	1.49	0.8203	built_models/moldata/GraphConv/0921-2134/
activity_1948	all_disease	93.99	0	0	0.0974	built_models/moldata/GraphConv/0921-2134/
activity_602449	all_disease	85.64	56.56	5	0.8273	built_models/moldata/GraphConv/0921-2134/
activity_1224865	all_disease	84.34	64.15	1.7	0.8055	built_models/moldata/GraphConv/0921-2134/
activity_588473	all_disease	85.57	60.38	2.51	0.7698	built_models/moldata/GraphConv/0921-2134/
activity_588475	all_disease	55.27	50	0.66	0.5577	built_models/moldata/GraphConv/0921-2134/
activity_493187	all_disease	67.79	82.93	0.31	0.8257	built_models/moldata/GraphConv/0921-2134/
activity_504462	all_disease	82.19	67.66	2.22	0.8441	built_models/moldata/GraphConv/0921-2134/
activity_463195	all_disease	77.24	68.48	4.86	0.812	built_models/moldata/GraphConv/0921-2134/
activity_485346	all_disease	72.12	78.89	10.37	0.8339	built_models/moldata/GraphConv/0921-2134/
activity_1496	all_disease	72.24	77.87	1.24	0.8232	built_models/moldata/GraphConv/0921-2134/
activity_1012	all_disease	84.74	74.24	1.29	0.8829	built_models/moldata/GraphConv/0921-2134/
activity_1216	all_disease	82.26	65.12	1.28	0.825	built_models/moldata/GraphConv/0921-2134/
activity_1259310	all_disease	84.83	36.71	0.43	0.6511	built_models/moldata/GraphConv/0921-2134/
activity_743269	all_disease	41.63	84.7	1.32	0.7806	built_models/moldata/GraphConv/0921-2134/
activity_652017	all_disease	72.01	59	2.24	0.6922	built_models/moldata/GraphConv/0921-2134/
activity_2642	all_disease	71.52	82.88	4.13	0.8383	built_models/moldata/GraphConv/0921-2134/
activity_488922	all_disease	91.63	46.76	7.78	0.8534	built_models/moldata/GraphConv/0921-2134/
activity_2237	all_disease	81.51	62.43	2.09	0.8111	built_models/moldata/GraphConv/0921-2134/
activity_2247	all_disease	63.12	73.68	0.75	0.7582	built_models/moldata/GraphConv/0921-2134/
activity_624483	all_disease	96.12	0.07	8.33	0.5969	built_models/moldata/GraphConv/0921-2134/
activity_1415	all_disease	38.73	66.33	0.38	0.566	built_models/moldata/GraphConv/0921-2134/
activity_1423	all_disease	32.77	70.64	0.41	0.5617	built_models/moldata/GraphConv/0921-2134/
activity_1439	all_disease	52.43	57.43	0.52	0.5605	built_models/moldata/GraphConv/0921-2134/
activity_1441	all_disease	23.06	75.22	0.4	0.5367	built_models/moldata/GraphConv/0921-2134/
activity_950	all_disease	88.91	33.33	0.26	0.6374	built_models/moldata/GraphConv/0921-2134/
activity_951	all_disease	87.52	23.81	0.16	0.6108	built_models/moldata/GraphConv/0921-2134/
activity_952	all_disease	81.67	71.43	0.11	0.7808	built_models/moldata/GraphConv/0921-2134/
activity_1007	all_disease	54.47	72.73	0.07	0.7316	built_models/moldata/GraphConv/0921-2134/
activity_1008	all_disease	86.85	57.58	0.59	0.7423	built_models/moldata/GraphConv/0921-2134/
activity_1009	all_disease	73.7	36.11	0.2	0.599	built_models/moldata/GraphConv/0921-2134/
activity_624263	all_disease	87.77	71.29	1.54	0.8812	built_models/moldata/GraphConv/0921-2134/
activity_651819	all_disease	38.82	54.95	0.27	0.4659	built_models/moldata/GraphConv/0921-2134/
activity_602438	all_disease	83.12	32.21	1.83	0.5981	built_models/moldata/GraphConv/0921-2134/
activity_651636	all_disease	86.61	56.36	3.63	0.8111	built_models/moldata/GraphConv/0921-2134/
activity_493098	all_disease	89.29	66.28	4.57	0.8641	built_models/moldata/GraphConv/0921-2134/
activity_2521	all_disease	81.19	59.83	1.16	0.7746	built_models/moldata/GraphConv/0921-2134/
activity_2520	all_disease	80.42	43.75	0.34	0.7218	built_models/moldata/GraphConv/0921-2134/
activity_1656	all_disease	75.86	71.26	1.15	0.7846	built_models/moldata/GraphConv/0921-2134/
activity_1259374	all_disease	82.97	66.84	3.27	0.8155	built_models/moldata/GraphConv/0921-2134/
activity_1259422	all_disease	67.37	77.01	3.79	0.8032	built_models/moldata/GraphConv/0921-2134/
activity_686940	all_disease	87.66	45.82	4.17	0.7722	built_models/moldata/GraphConv/0921-2134/
activity_720508	all_disease	32.85	85.29	0.22	0.672	built_models/moldata/GraphConv/0921-2134/
activity_720509	all_disease	52.5	62.04	0.35	0.6381	built_models/moldata/GraphConv/0921-2134/
activity_720543	all_disease	86.96	76.6	3.81	0.886	built_models/moldata/GraphConv/0921-2134/
activity_720582	all_disease	71.06	84.34	1.8	0.8598	built_models/moldata/GraphConv/0921-2134/
activity_720648	all_disease	70.14	76.19	2.25	0.8122	built_models/moldata/GraphConv/0921-2134/
activity_720700	all_disease	41.94	69.05	1.04	0.5804	built_models/moldata/GraphConv/0921-2134/
activity_720704	all_disease	40.25	69.41	0.25	0.5721	built_models/moldata/GraphConv/0921-2134/
activity_651958	all_disease	24.76	96.08	0.82	0.8174	built_models/moldata/GraphConv/0921-2134/
activity_602396	all_disease	91.21	55.77	1.73	0.852	built_models/moldata/GraphConv/0921-2134/
activity_624169	all_disease	43.58	69.62	0.84	0.5998	built_models/moldata/GraphConv/0921-2134/
activity_651602	all_disease	78	84.89	1.39	0.8813	built_models/moldata/GraphConv/0921-2134/
activity_602229	all_disease	74.57	60.59	1.28	0.7509	built_models/moldata/GraphConv/0921-2134/
activity_588352	all_disease	83.46	66.44	1.58	0.8315	built_models/moldata/GraphConv/0921-2134/
activity_588726	all_disease	76.7	80.67	7.86	0.8511	built_models/moldata/GraphConv/0921-2134/
activity_588354	all_disease	90.72	56.19	1.72	0.8323	built_models/moldata/GraphConv/0921-2134/
activity_651719	all_disease	84.2	38.54	1.25	0.6859	built_models/moldata/GraphConv/0921-2134/
activity_588335	all_disease	81.37	79.03	6.26	0.8889	built_models/moldata/GraphConv/0921-2134/
activity_504326	all_disease	84.95	67.55	2.01	0.8417	built_models/moldata/GraphConv/0921-2134/
activity_504357	all_disease	65.4	77.65	0.57	0.7776	built_models/moldata/GraphConv/0921-2134/
activity_434989	all_disease	77.33	60.43	1.55	0.7702	built_models/moldata/GraphConv/0921-2134/
activity_435030	all_disease	77.74	80.17	1.35	0.8551	built_models/moldata/GraphConv/0921-2134/
activity_449728	all_disease	70.81	83.87	1.1	0.8608	built_models/moldata/GraphConv/0921-2134/
activity_463079	all_disease	84.3	56.2	2.69	0.8019	built_models/moldata/GraphConv/0921-2134/
activity_463141	all_disease	60.96	88.89	0.19	0.7685	built_models/moldata/GraphConv/0921-2134/
activity_463210	all_disease	79.08	74.19	0.34	0.8302	built_models/moldata/GraphConv/0921-2134/
activity_485270	all_disease	79.59	68.72	6.89	0.8237	built_models/moldata/GraphConv/0921-2134/
activity_485272	all_disease	63.47	84.38	1.14	0.8363	built_models/moldata/GraphConv/0921-2134/
activity_2435	all_disease	83.99	53.04	1.2	0.7789	built_models/moldata/GraphConv/0921-2134/
activity_2445	all_disease	38.8	66.67	0.06	0.6131	built_models/moldata/GraphConv/0921-2134/
activity_2606	all_disease	80.03	77.78	0.33	0.8401	built_models/moldata/GraphConv/0921-2134/
activity_2796	all_disease	79.7	75.55	9.42	0.8538	built_models/moldata/GraphConv/0921-2134/
activity_2797	all_disease	82.4	55.67	0.96	0.7823	built_models/moldata/GraphConv/0921-2134/
activity_2280	all_disease	83.7	66.51	2.76	0.7996	built_models/moldata/GraphConv/0921-2134/
activity_1987	all_disease	82.98	63.77	0.83	0.7817	built_models/moldata/GraphConv/0921-2134/
activity_2235	all_disease	72.56	83.26	4.12	0.8522	built_models/moldata/GraphConv/0921-2134/
activity_2300	all_disease	50.73	82.98	0.25	0.8035	built_models/moldata/GraphConv/0921-2134/
activity_1899	all_disease	71.43	83.33	2.21	0.8494	built_models/moldata/GraphConv/0921-2134/
activity_1950	all_disease	62.18	70.23	0.8	0.7362	built_models/moldata/GraphConv/0921-2134/
activity_1962	all_disease	84.53	74.07	5.74	0.8633	built_models/moldata/GraphConv/0921-2134/
activity_1527	all_disease	86.46	67.88	5.41	0.8604	built_models/moldata/GraphConv/0921-2134/
activity_1556	all_disease	46.5	78.57	0.83	0.7112	built_models/moldata/GraphConv/0921-2134/
activity_1700	all_disease	74.04	73.13	0.63	0.8188	built_models/moldata/GraphConv/0921-2134/
activity_1706	all_disease	68.23	75	0.29	0.7986	built_models/moldata/GraphConv/0921-2134/
activity_1789	all_disease	87.23	50	3.85	0.7517	built_models/moldata/GraphConv/0921-2134/
activity_1800	all_disease	71.01	78.2	1.89	0.8186	built_models/moldata/GraphConv/0921-2134/
activity_1825	all_disease	74.24	68.07	2.09	0.8013	built_models/moldata/GraphConv/0921-2134/
activity_1861	all_disease	77.52	46.99	2.47	0.6964	built_models/moldata/GraphConv/0921-2134/
activity_1304	all_disease	80.56	68.54	1.14	0.7932	built_models/moldata/GraphConv/0921-2134/
activity_1359	all_disease	78.03	57.76	1.11	0.7225	built_models/moldata/GraphConv/0921-2134/
activity_1416	all_disease	46.84	74.36	0.2	0.6802	built_models/moldata/GraphConv/0921-2134/
activity_1424	all_disease	82.81	70.45	0.66	0.8712	built_models/moldata/GraphConv/0921-2134/
activity_1446	all_disease	54.11	84.26	2.01	0.7745	built_models/moldata/GraphConv/0921-2134/
activity_1448	all_disease	88.92	46.58	1.12	0.7857	built_models/moldata/GraphConv/0921-2134/
activity_1481	all_disease	58.62	84.4	1.04	0.8238	built_models/moldata/GraphConv/0921-2134/
activity_1486	all_disease	41.64	84.01	1.65	0.7448	built_models/moldata/GraphConv/0921-2134/
activity_1509	all_disease	74.76	30.59	0.38	0.5454	built_models/moldata/GraphConv/0921-2134/
activity_1510	all_disease	56.44	85.33	0.53	0.8213	built_models/moldata/GraphConv/0921-2134/
activity_1515	all_disease	54.97	50	0.23	0.5498	built_models/moldata/GraphConv/0921-2134/
activity_1040	all_disease	87.95	43.24	4.34	0.7545	built_models/moldata/GraphConv/0921-2134/
activity_861	all_disease	81.22	70.21	0.71	0.8339	built_models/moldata/GraphConv/0921-2134/
activity_793	all_disease	60.65	78.89	2.13	0.7706	built_models/moldata/GraphConv/0921-2134/
activity_803	all_disease	86.36	41.79	1.12	0.6977	built_models/moldata/GraphConv/0921-2134/
activity_828	all_disease	67.8	61.84	0.79	0.7246	built_models/moldata/GraphConv/0921-2134/
activity_623870	all_disease	80.26	79.6	4.14	0.881	built_models/moldata/GraphConv/0921-2134/
activity_743287	all_disease	52.58	73.76	1.18	0.6701	built_models/moldata/GraphConv/0921-2134/
activity_602329	all_disease	81.89	89.23	1.06	0.9513	built_models/moldata/GraphConv/0921-2134/
activity_651654	all_disease	99.13	3.7	0.43	0.7907	built_models/moldata/GraphConv/0921-2134/
activity_602405	all_disease	54.56	58.54	0.18	0.5969	built_models/moldata/GraphConv/0921-2134/
activity_651610	all_disease	90	26.97	4.31	0.7056	built_models/moldata/GraphConv/0921-2134/
activity_652154	all_disease	90.44	47.05	7.69	0.7894	built_models/moldata/GraphConv/0921-2134/
activity_504884	all_disease	61.55	65.62	0.15	0.7328	built_models/moldata/GraphConv/0921-2134/
activity_602481	all_disease	80.01	63.89	0.39	0.7944	built_models/moldata/GraphConv/0921-2134/
activity_652163	all_disease	53.33	80	0.22	0.7882	built_models/moldata/GraphConv/0921-2134/
activity_651710	all_disease	83.82	82.05	2.82	0.9136	built_models/moldata/GraphConv/0921-2134/
activity_588549	all_disease	86.77	75	1.47	0.8903	built_models/moldata/GraphConv/0921-2134/
activity_651711	all_disease	61.14	66.67	0.06	0.666	built_models/moldata/GraphConv/0921-2134/
activity_652162	all_disease	63.69	43.42	0.33	0.563	built_models/moldata/GraphConv/0921-2134/
activity_588436	all_disease	55.49	62.07	0.23	0.6203	built_models/moldata/GraphConv/0921-2134/
activity_651687	all_disease	91.88	40.51	1.37	0.7502	built_models/moldata/GraphConv/0921-2134/
activity_651723	all_disease	86.33	38.2	0.86	0.7105	built_models/moldata/GraphConv/0921-2134/
activity_588391	all_disease	53.84	81.82	0.17	0.8136	built_models/moldata/GraphConv/0921-2134/
activity_686996	all_disease	21.93	94.92	1.06	0.819	built_models/moldata/GraphConv/0921-2134/
activity_720511	all_disease	45.71	83.33	0.71	0.699	built_models/moldata/GraphConv/0921-2134/
activity_651640	all_disease	40.05	74.61	1.92	0.6214	built_models/moldata/GraphConv/0921-2134/
activity_651661	all_disease	83.17	61.13	3.54	0.8102	built_models/moldata/GraphConv/0921-2134/
activity_743247	all_disease	59.39	47.83	0.18	0.5461	built_models/moldata/GraphConv/0921-2134/
activity_504558	all_disease	78.94	65.24	3.3	0.7811	built_models/moldata/GraphConv/0921-2134/
activity_652197	all_disease	87.37	58.46	1.19	0.7971	built_models/moldata/GraphConv/0921-2134/
activity_488895	all_disease	74.71	88.24	0.18	0.9165	built_models/moldata/GraphConv/0921-2134/
activity_488965	all_disease	82.32	50	0.15	0.7455	built_models/moldata/GraphConv/0921-2134/
activity_493131	all_disease	81.2	77.25	4.24	0.8712	built_models/moldata/GraphConv/0921-2134/
activity_504523	all_disease	40.54	85.25	0.26	0.7458	built_models/moldata/GraphConv/0921-2134/
activity_504582	all_disease	67.59	70.36	1.8	0.7722	built_models/moldata/GraphConv/0921-2134/
activity_504423	all_disease	75.58	74.29	0.32	0.825	built_models/moldata/GraphConv/0921-2134/
activity_602346	all_disease	46.82	71.81	0.6	0.6288	built_models/moldata/GraphConv/0921-2134/
activity_602342	all_disease	69.27	50.56	0.5	0.6696	built_models/moldata/GraphConv/0921-2134/
activity_623901	all_disease	95.71	19.15	0.74	0.6692	built_models/moldata/GraphConv/0921-2134/
activity_743397	all_disease	49.2	82.76	0.14	0.7497	built_models/moldata/GraphConv/0921-2134/
activity_488839	all_disease	95.24	66.67	0.13	0.9028	built_models/moldata/GraphConv/0921-2134/
activity_602340	all_disease	95.33	4.36	1.4	0.5312	built_models/moldata/GraphConv/0921-2134/
activity_488899	all_disease	83.23	73.98	5.97	0.8754	built_models/moldata/GraphConv/0921-2134/
activity_540336	all_disease	86.86	29.31	0.4	0.6677	built_models/moldata/GraphConv/0921-2134/
activity_504406	all_disease	50.93	94.44	0.11	0.8974	built_models/moldata/GraphConv/0921-2134/
activity_488896	all_disease	88.84	62.58	5.18	0.859	built_models/moldata/GraphConv/0921-2134/
activity_504775	all_disease	64.46	37.84	0.12	0.5512	built_models/moldata/GraphConv/0921-2134/
activity_743445	all_disease	59.14	74.18	1.27	0.7582	built_models/moldata/GraphConv/0921-2134/
activity_743398	all_disease	58.25	85.16	2.23	0.8037	built_models/moldata/GraphConv/0921-2134/
activity_588334	all_disease	81.01	70.9	2.35	0.8527	built_models/moldata/GraphConv/0921-2134/
activity_686992	all_disease	89.26	22	0.52	0.6133	built_models/moldata/GraphConv/0921-2134/
activity_2016	all_disease	80.91	27.27	0.86	0.5785	built_models/moldata/GraphConv/0921-2134/
activity_2025	all_disease	78.63	29.03	0.41	0.5196	built_models/moldata/GraphConv/0921-2134/
activity_2023	all_disease	67.16	79.2	0.96	0.7995	built_models/moldata/GraphConv/0921-2134/
activity_2066	all_disease	66.37	55.56	0.05	0.5034	built_models/moldata/GraphConv/0921-2134/
activity_2029	all_disease	74.46	58.33	0.18	0.7215	built_models/moldata/GraphConv/0921-2134/
activity_2462	all_disease	86.35	58.62	0.4	0.8544	built_models/moldata/GraphConv/0921-2134/
activity_2661	all_disease	74.46	77.78	0.26	0.849	built_models/moldata/GraphConv/0921-2134/
activity_2716	all_disease	94.22	5.2	1.23	0.4971	built_models/moldata/GraphConv/0921-2134/
activity_2718	all_disease	78.98	66.67	0.53	0.8137	built_models/moldata/GraphConv/0921-2134/
activity_2650	all_disease	81.42	68.42	0.46	0.807	built_models/moldata/GraphConv/0921-2134/
activity_435005	all_disease	78.68	74.07	3.69	0.8485	built_models/moldata/GraphConv/0921-2134/
activity_1885	all_disease	77.65	73.38	6.18	0.8366	built_models/moldata/GraphConv/0921-2134/
activity_1979	all_disease	67.21	70.86	1.28	0.7668	built_models/moldata/GraphConv/0921-2134/
activity_2097	all_disease	95.57	50	0.38	0.8814	built_models/moldata/GraphConv/0921-2134/
activity_2717	all_disease	83.54	72.24	6.09	0.8719	built_models/moldata/GraphConv/0921-2134/
activity_1910	all_disease	39.43	82.35	0.55	0.7488	built_models/moldata/GraphConv/0921-2134/
activity_841	all_disease	73.61	21.59	1.48	0.4829	built_models/moldata/GraphConv/0921-2134/
activity_1053175	all_disease	87.69	82.28	1.75	0.8928	built_models/moldata/GraphConv/0921-2134/
activity_1259309	all_disease	86.75	72.97	2.69	0.8873	built_models/moldata/GraphConv/0921-2134/
activity_1259311	all_disease	83.99	87.63	1.76	0.9191	built_models/moldata/GraphConv/0921-2134/
activity_720641	all_disease	72.86	76.79	1.67	0.8012	built_models/moldata/GraphConv/0921-2134/
activity_588519	all_disease	60.92	74	1.21	0.7524	built_models/moldata/GraphConv/0921-2134/
activity_492967	all_disease	80.22	58.14	0.71	0.7583	built_models/moldata/GraphConv/0921-2134/
activity_504770	all_disease	84.43	54.35	0.84	0.7167	built_models/moldata/GraphConv/0921-2134/
activity_485395	all_disease	79.77	90	0.29	0.9352	built_models/moldata/GraphConv/0921-2134/
activity_493033	all_disease	69.71	89.93	2.74	0.8809	built_models/moldata/GraphConv/0921-2134/
activity_540299	all_disease	42.57	65.62	0.47	0.5839	built_models/moldata/GraphConv/0921-2134/
activity_651702	all_disease	78.24	68.83	2.54	0.82	built_models/moldata/GraphConv/0921-2134/
activity_588497	all_disease	98.77	7.5	1.6	0.6223	built_models/moldata/GraphConv/0921-2134/
activity_588501	all_disease	82.56	65.28	0.73	0.8242	built_models/moldata/GraphConv/0921-2134/
activity_504577	all_disease	85.66	12.12	0.33	0.5011	built_models/moldata/GraphConv/0921-2134/
activity_485275	all_disease	78.77	35.88	0.9	0.6041	built_models/moldata/GraphConv/0921-2134/
activity_2690	all_disease	66.6	68.89	0.29	0.7056	built_models/moldata/GraphConv/0921-2134/
activity_1347041	all_disease	66.77	69.15	0.42	0.7387	built_models/moldata/GraphConv/0921-2134/
activity_602332	all_disease	96	10	0.06	0.594	built_models/moldata/GraphConv/0921-2134/
activity_686979	all_disease	67.91	83.05	34.07	0.825	built_models/moldata/GraphConv/0921-2134/
activity_686978	all_disease	72.19	82.17	44.97	0.8371	built_models/moldata/GraphConv/0921-2134/
activity_624173	all_disease	89.78	86.49	1.65	0.9307	built_models/moldata/GraphConv/0921-2134/
activity_1347131	all_disease	82.15	67.88	3.2	0.8226	built_models/moldata/GraphConv/0921-2134/
activity_1159524	all_disease	80.38	65.87	6.57	0.8111	built_models/moldata/GraphConv/0921-2134/
activity_1347071	all_disease	87.71	78.57	0.48	0.8875	built_models/moldata/GraphConv/0921-2134/
activity_1259415	all_disease	70.88	58.22	11.39	0.7105	built_models/moldata/GraphConv/0921-2134/
activity_588453	all_disease	88.35	68.22	8.37	0.8776	built_models/moldata/GraphConv/0921-2134/
activity_588456	all_disease	92.24	100	0.41	0.9959	built_models/moldata/GraphConv/0921-2134/
activity_588795	all_disease	83.13	88.68	3.18	0.9319	built_models/moldata/GraphConv/0921-2134/
activity_602179	all_disease	77.69	67.92	0.46	0.8408	built_models/moldata/GraphConv/0921-2134/
activity_686970	all_disease	82.83	62.93	8.6	0.826	built_models/moldata/GraphConv/0921-2134/
activity_686971	all_disease	80.68	64.23	9.79	0.8266	built_models/moldata/GraphConv/0921-2134/
activity_485364	all_disease	80.25	71.18	15.84	0.8322	built_models/moldata/GraphConv/0921-2134/
activity_2528	all_disease	72.56	88.46	1.27	0.9042	built_models/moldata/GraphConv/0921-2134/
activity_485290	all_disease	79.92	63.57	1.26	0.797	built_models/moldata/GraphConv/0921-2134/
activity_2517	all_disease	67.61	87.13	1.59	0.862	built_models/moldata/GraphConv/0921-2134/
activity_485281	all_disease	84.49	72.5	0.64	0.8692	built_models/moldata/GraphConv/0921-2134/
activity_624296	all_disease	76.71	70.36	12.5	0.8089	built_models/moldata/GraphConv/0921-2134/
activity_624297	all_disease	79.35	67.18	7.9	0.8102	built_models/moldata/GraphConv/0921-2134/
activity_651820	all_disease	84.36	61.25	18.28	0.8363	built_models/moldata/GraphConv/0921-2134/
activity_540267	all_disease	91.21	76.67	1.54	0.9324	built_models/moldata/GraphConv/0921-2134/
activity_504937	all_disease	97.36	0	0	0.7957	built_models/moldata/GraphConv/0921-2134/
activity_624288	all_disease	72.07	66.67	1.14	0.7619	built_models/moldata/GraphConv/0921-2134/
activity_624287	all_disease	66.78	86.79	0.47	0.8248	built_models/moldata/GraphConv/0921-2134/
activity_463254	all_disease	76.36	100	0.11	0.9949	built_models/moldata/GraphConv/0921-2134/
activity_720580	all_disease	85.68	63.57	4.08	0.845	built_models/moldata/GraphConv/0921-2134/
activity_504466	all_disease	89.06	69.9	7.74	0.8916	built_models/moldata/GraphConv/0921-2134/
activity_504467	all_disease	84.58	56.36	16.29	0.8188	built_models/moldata/GraphConv/0921-2134/
activity_652105	all_disease	85.21	74.7	8.76	0.8748	built_models/moldata/GraphConv/0921-2134/
activity_2101	all_disease	75.74	70	0.27	0.802	built_models/moldata/GraphConv/0921-2134/
activity_504834	all_disease	63.03	67.22	20.75	0.704	built_models/moldata/GraphConv/0921-2134/
activity_485349	all_disease	74.02	49.23	0.4	0.6861	built_models/moldata/GraphConv/0921-2134/
activity_2685	all_disease	14.45	90.13	1.07	0.566	built_models/moldata/GraphConv/0921-2134/
activity_720579	all_disease	86.92	51.84	4.38	0.8049	built_models/moldata/GraphConv/0921-2134/
activity_504832	all_disease	71.99	81.53	23.65	0.8455	built_models/moldata/GraphConv/0921-2134/
activity_2100	all_disease	69.72	83.67	0.93	0.8419	built_models/moldata/GraphConv/0921-2134/
activity_2314	all_disease	70.91	78.54	26.43	0.8194	built_models/moldata/GraphConv/0921-2134/
activity_2472	all_disease	77.59	77.89	3.19	0.8489	built_models/moldata/GraphConv/0921-2134/
activity_2451	all_disease	65.31	90.56	1.94	0.8911	built_models/moldata/GraphConv/0921-2134/
activity_1868	all_disease	97.37	0	0	0.6248	built_models/moldata/GraphConv/0921-2134/
activity_1460	all_disease	90.79	82.3	24.38	0.939	built_models/moldata/GraphConv/0921-2134/
activity_1768	all_disease	90.55	46.15	1.47	0.8126	built_models/moldata/GraphConv/0921-2134/
activity_1631	all_disease	61.61	88.59	1.18	0.8477	built_models/moldata/GraphConv/0921-2134/
activity_1634	all_disease	86.3	68.42	0.32	0.8711	built_models/moldata/GraphConv/0921-2134/
activity_2107	all_disease	94.78	0	0	0.8827	built_models/moldata/GraphConv/0921-2134/
activity_1471	all_disease	32.49	87.5	0.21	0.7156	built_models/moldata/GraphConv/0921-2134/
activity_1688	all_disease	86.14	44.62	4.1	0.7444	built_models/moldata/GraphConv/0921-2134/
activity_1030	all_disease	68.28	64.76	21.74	0.7279	built_models/moldata/GraphConv/0921-2134/
activity_1379	all_disease	86.58	84.62	1.86	0.9127	built_models/moldata/GraphConv/0921-2134/
activity_2242	all_disease	88.45	82.05	2.35	0.9291	built_models/moldata/GraphConv/0921-2134/
activity_1476	all_disease	84.18	78.16	16.12	0.8877	built_models/moldata/GraphConv/0921-2134/
activity_1478	all_disease	80.21	64.08	1.59	0.8097	built_models/moldata/GraphConv/0921-2134/
activity_1452	all_disease	78.51	84.21	0.36	0.855	built_models/moldata/GraphConv/0921-2134/
activity_894	all_disease	77.99	64.42	14.42	0.7882	built_models/moldata/GraphConv/0921-2134/
activity_902	all_disease	63.67	84.18	2.82	0.8074	built_models/moldata/GraphConv/0921-2134/
activity_924	all_disease	79.37	73.17	4.04	0.8396	built_models/moldata/GraphConv/0921-2134/
activity_1347417	all_disease	86.35	59.29	16.05	0.8532	built_models/moldata/GraphConv/0921-2134/
activity_881	all_disease	89.62	74.12	3.76	0.8985	built_models/moldata/GraphConv/0921-2134/
activity_624168	all_disease	71.17	57.47	0.46	0.7009	built_models/moldata/GraphConv/0921-2134/
activity_624204	all_disease	75.91	85.15	0.93	0.882	built_models/moldata/GraphConv/0921-2134/
activity_624354	all_disease	78.81	76.05	4.78	0.846	built_models/moldata/GraphConv/0921-2134/
activity_651560	all_disease	79.82	85.45	1.81	0.8965	built_models/moldata/GraphConv/0921-2134/
activity_602244	all_disease	83.82	63.85	2.22	0.8139	built_models/moldata/GraphConv/0921-2134/
activity_602261	all_disease	88.34	72.49	4.34	0.9024	built_models/moldata/GraphConv/0921-2134/
activity_602274	all_disease	22.43	88.89	0.08	0.6506	built_models/moldata/GraphConv/0921-2134/
activity_602399	all_disease	78.29	86.45	5.67	0.903	built_models/moldata/GraphConv/0921-2134/
activity_588458	all_disease	69.14	80.93	3.28	0.8333	built_models/moldata/GraphConv/0921-2134/
activity_588489	all_disease	59.92	85.16	1.04	0.804	built_models/moldata/GraphConv/0921-2134/
activity_588492	all_disease	67.6	82.96	2.12	0.8422	built_models/moldata/GraphConv/0921-2134/
activity_588621	all_disease	90.08	53.33	1.53	0.7923	built_models/moldata/GraphConv/0921-2134/
activity_588850	all_disease	78.02	73.07	4.65	0.8444	built_models/moldata/GraphConv/0921-2134/
activity_602141	all_disease	91.52	55.84	4.09	0.8545	built_models/moldata/GraphConv/0921-2134/
activity_504720	all_disease	75.43	73.2	1.29	0.8107	built_models/moldata/GraphConv/0921-2134/
activity_493091	all_disease	69.84	81.46	3.17	0.8335	built_models/moldata/GraphConv/0921-2134/
activity_493160	all_disease	88.84	72.45	1.84	0.8926	built_models/moldata/GraphConv/0921-2134/
activity_493011	all_disease	74.19	66.25	1.27	0.7663	built_models/moldata/GraphConv/0921-2134/
activity_493012	all_disease	70.88	80.29	1.17	0.8352	built_models/moldata/GraphConv/0921-2134/
activity_449763	all_disease	78.09	81.01	1.79	0.8826	built_models/moldata/GraphConv/0921-2134/
activity_463104	all_disease	86.51	65.1	2.22	0.8765	built_models/moldata/GraphConv/0921-2134/
activity_463190	all_disease	86.73	44.36	8.09	0.793	built_models/moldata/GraphConv/0921-2134/
activity_463212	all_disease	75.73	75.35	4.08	0.8332	built_models/moldata/GraphConv/0921-2134/
activity_435022	all_disease	87.86	31.82	1.09	0.6849	built_models/moldata/GraphConv/0921-2134/
activity_2380	all_disease	27.38	87.34	0.3	0.6328	built_models/moldata/GraphConv/0921-2134/
activity_2825	all_disease	63.01	84.13	0.89	0.8245	built_models/moldata/GraphConv/0921-2134/
activity_435003	all_disease	80.54	62.56	2.11	0.7945	built_models/moldata/GraphConv/0921-2134/
activity_651582	all_disease	80.25	64.14	3.21	0.7992	built_models/moldata/GraphConv/0921-2134/
activity_1443	all_disease	91.65	66.15	3.68	0.8953	built_models/moldata/GraphConv/0921-2134/
activity_1135	all_disease	89.31	77.78	0.26	0.8957	built_models/moldata/GraphConv/0921-2134/
activity_1217	all_disease	69.42	86.41	2.08	0.8569	built_models/moldata/GraphConv/0921-2134/
activity_1029	all_disease	63.99	35.71	0.09	0.574	built_models/moldata/GraphConv/0921-2134/
activity_720637	all_disease	75.72	81.2	49.74	0.8377	built_models/moldata/GraphConv/0921-2134/
activity_1347034	all_disease	64.85	70.67	20.15	0.7425	built_models/moldata/GraphConv/0921-2134/
activity_1347037	all_disease	66.22	74.29	10.66	0.7539	built_models/moldata/GraphConv/0921-2134/
activity_602233	all_disease	77.47	93.75	0.2	0.9542	built_models/moldata/GraphConv/0921-2134/
activity_485367	all_disease	68.56	90.38	0.47	0.8918	built_models/moldata/GraphConv/0921-2134/
activity_1490	all_disease	67.91	80.18	11.09	0.8205	built_models/moldata/GraphConv/0921-2134/
activity_1468	all_disease	81.09	76.8	1.81	0.8641	built_models/moldata/GraphConv/0921-2134/
activity_602440	all_disease	84.08	71.66	3.56	0.8448	built_models/moldata/GraphConv/0921-2134/
activity_504690	all_disease	69.63	85.89	3.17	0.8584	built_models/moldata/GraphConv/0921-2134/
activity_588413	all_disease	70.09	65.52	2.22	0.7393	built_models/moldata/GraphConv/0921-2134/
activity_652067	all_disease	73.21	79.23	4.13	0.8344	built_models/moldata/GraphConv/0921-2134/
activity_652126	all_disease	66.23	75.25	2.25	0.772	built_models/moldata/GraphConv/0921-2134/
activity_652257	all_disease	76.44	79.54	6.32	0.8556	built_models/moldata/GraphConv/0921-2134/
activity_686964	all_disease	43.53	78.08	0.51	0.7132	built_models/moldata/GraphConv/0921-2134/
activity_687014	all_disease	85.21	70.15	7.74	0.864	built_models/moldata/GraphConv/0921-2134/
activity_687016	all_disease	77.59	41.84	1.59	0.6237	built_models/moldata/GraphConv/0921-2134/
activity_720596	all_disease	84.96	51.35	1.9	0.7831	built_models/moldata/GraphConv/0921-2134/
activity_720702	all_disease	78.08	77.4	1.28	0.8475	built_models/moldata/GraphConv/0921-2134/
activity_743126	all_disease	73.12	73.3	1.4	0.798	built_models/moldata/GraphConv/0921-2134/
activity_1053197	all_disease	77.37	60.69	2.13	0.7497	built_models/moldata/GraphConv/0921-2134/
activity_651821	all_disease	84.46	89.31	7.26	0.9363	built_models/moldata/GraphConv/0921-2134/
activity_651957	all_disease	84.96	68.29	1.4	0.8381	built_models/moldata/GraphConv/0921-2134/
activity_652010	all_disease	44.32	88.64	1.61	0.7907	built_models/moldata/GraphConv/0921-2134/
activity_652039	all_disease	69.38	86.84	2.77	0.8791	built_models/moldata/GraphConv/0921-2134/
activity_602281	all_disease	62.66	90.61	2.98	0.8799	built_models/moldata/GraphConv/0921-2134/
activity_624267	all_disease	84.05	70.42	2.44	0.8338	built_models/moldata/GraphConv/0921-2134/
activity_624268	all_disease	54.17	90.08	0.62	0.8541	built_models/moldata/GraphConv/0921-2134/
activity_624377	all_disease	49.82	87	0.45	0.7963	built_models/moldata/GraphConv/0921-2134/
activity_624416	all_disease	94.66	36.55	2.66	0.8121	built_models/moldata/GraphConv/0921-2134/
activity_651718	all_disease	80.94	78.57	3.69	0.8804	built_models/moldata/GraphConv/0921-2134/
activity_651800	all_disease	67.77	74.85	0.99	0.7835	built_models/moldata/GraphConv/0921-2134/
activity_651572	all_disease	75.93	65.35	0.72	0.7903	built_models/moldata/GraphConv/0921-2134/
activity_602163	all_disease	29.91	79.84	0.38	0.6133	built_models/moldata/GraphConv/0921-2134/
activity_602123	all_disease	65.46	67.8	1.23	0.7363	built_models/moldata/GraphConv/0921-2134/
activity_540364	all_disease	87.52	40	2.02	0.7682	built_models/moldata/GraphConv/0921-2134/
activity_504411	all_disease	85.76	93.55	0.59	0.9656	built_models/moldata/GraphConv/0921-2134/
activity_504700	all_disease	32.83	66.67	0.05	0.5021	built_models/moldata/GraphConv/0921-2134/
activity_504707	all_disease	73.58	35.29	0.13	0.558	built_models/moldata/GraphConv/0921-2134/
activity_504734	all_disease	82.49	80.85	1.25	0.8584	built_models/moldata/GraphConv/0921-2134/
activity_504766	all_disease	62.25	52.35	1.29	0.6097	built_models/moldata/GraphConv/0921-2134/
activity_504803	all_disease	89.1	79.69	5.23	0.9199	built_models/moldata/GraphConv/0921-2134/
activity_492953	all_disease	81.46	76.83	5.06	0.8712	built_models/moldata/GraphConv/0921-2134/
activity_492956	all_disease	79.63	74.75	3.28	0.8319	built_models/moldata/GraphConv/0921-2134/
activity_492972	all_disease	77.56	91.55	1.71	0.9376	built_models/moldata/GraphConv/0921-2134/
activity_493008	all_disease	88.62	82.76	2.48	0.9132	built_models/moldata/GraphConv/0921-2134/
activity_493087	all_disease	48.38	80.77	0.12	0.6992	built_models/moldata/GraphConv/0921-2134/
activity_493244	all_disease	60.16	63.83	0.23	0.6824	built_models/moldata/GraphConv/0921-2134/
activity_463082	all_disease	68.55	81.25	4.48	0.8285	built_models/moldata/GraphConv/0921-2134/
activity_2751	all_disease	60.98	89.16	2.28	0.8448	built_models/moldata/GraphConv/0921-2134/
activity_434962	all_disease	81.27	69.14	2.01	0.8187	built_models/moldata/GraphConv/0921-2134/
activity_2130	all_disease	72.79	78.74	1.6	0.8459	built_models/moldata/GraphConv/0921-2134/
activity_2174	all_disease	57.38	83.33	0.41	0.7999	built_models/moldata/GraphConv/0921-2134/
activity_2177	all_disease	65.82	80.99	1.08	0.8049	built_models/moldata/GraphConv/0921-2134/
activity_2234	all_disease	72.16	72.58	0.52	0.8062	built_models/moldata/GraphConv/0921-2134/
activity_2057	all_disease	49.96	89.26	1.84	0.8405	built_models/moldata/GraphConv/0921-2134/
activity_2129	all_disease	61.84	85.55	2.5	0.8368	built_models/moldata/GraphConv/0921-2134/
activity_1906	all_disease	81.97	41.49	1.43	0.6627	built_models/moldata/GraphConv/0921-2134/
activity_1947	all_disease	78.06	88.57	1.83	0.9072	built_models/moldata/GraphConv/0921-2134/
activity_1974	all_disease	63.21	86.72	2.69	0.8467	built_models/moldata/GraphConv/0921-2134/
activity_1822	all_disease	58.81	88.34	2.72	0.8362	built_models/moldata/GraphConv/0921-2134/
activity_1845	all_disease	81.29	84	0.75	0.9078	built_models/moldata/GraphConv/0921-2134/
activity_1321	all_disease	74.75	35.94	1.68	0.5754	built_models/moldata/GraphConv/0921-2134/
activity_631	all_disease	49.37	87.88	0.69	0.8115	built_models/moldata/GraphConv/0921-2134/
activity_731	all_disease	73.49	69.7	0.7	0.8017	built_models/moldata/GraphConv/0921-2134/
activity_1032	all_disease	59.19	84.34	0.69	0.8161	built_models/moldata/GraphConv/0921-2134/
activity_1203	all_disease	83.99	81.82	0.23	0.863	built_models/moldata/GraphConv/0921-2134/
activity_920	all_disease	84.98	66.04	1.86	0.8339	built_models/moldata/GraphConv/0921-2134/
activity_932	all_disease	81.54	75.93	8.39	0.8644	built_models/moldata/GraphConv/0921-2134/
activity_862	all_disease	93.3	44.74	7.34	0.8264	built_models/moldata/GraphConv/0921-2134/
activity_871	all_disease	60.54	84.14	1.94	0.8271	built_models/moldata/GraphConv/0921-2134/
activity_743093	all_disease	43.66	77.78	0.07	0.5704	built_models/moldata/GraphConv/0921-2134/
activity_2052	all_disease	15.76	80	0.06	0.4815	built_models/moldata/GraphConv/0921-2134/
activity_1529	all_disease	59.1	54.39	2.15	0.5841	built_models/moldata/GraphConv/0921-2134/
activity_1530	all_disease	93.36	45.61	2.67	0.818	built_models/moldata/GraphConv/0921-2134/
activity_1531	all_disease	61.88	71	2.72	0.7305	built_models/moldata/GraphConv/0921-2134/
activity_758	all_disease	84.64	26.32	0.14	0.5892	built_models/moldata/GraphConv/0921-2134/
activity_760	all_disease	81.94	65.08	0.94	0.813	built_models/moldata/GraphConv/0921-2134/
activity_761	all_disease	92.17	38.89	1.5	0.7691	built_models/moldata/GraphConv/0921-2134/
activity_757	all_disease	87.56	46.25	1.24	0.7586	built_models/moldata/GraphConv/0921-2134/
activity_759	all_disease	87.24	55.56	0.98	0.7746	built_models/moldata/GraphConv/0921-2134/
activity_764	all_disease	84.86	34.29	0.33	0.7359	built_models/moldata/GraphConv/0921-2134/
activity_1325	all_disease	72.63	65	0.19	0.7202	built_models/moldata/GraphConv/0921-2134/
activity_1326	all_disease	68.31	71.43	0.19	0.8064	built_models/moldata/GraphConv/0921-2134/
activity_493014	all_disease	76.02	47.06	0.14	0.7136	built_models/moldata/GraphConv/0921-2134/
activity_588664	all_disease	33.42	83.33	0.69	0.7038	built_models/moldata/GraphConv/0921-2134/
activity_602410	all_disease	81.57	68.55	3.62	0.8358	built_models/moldata/GraphConv/0921-2134/
activity_623877	all_disease	55.21	62.7	0.53	0.6304	built_models/moldata/GraphConv/0921-2134/
activity_488975	all_disease	78.18	39.74	1.82	0.6472	built_models/moldata/GraphConv/0921-2134/
activity_488977	all_disease	80.39	64.89	2.42	0.8096	built_models/moldata/GraphConv/0921-2134/
activity_588511	all_disease	69.32	59.43	2.67	0.7171	built_models/moldata/GraphConv/0921-2134/
activity_588627	all_disease	79.36	59.39	1.55	0.7815	built_models/moldata/GraphConv/0921-2134/
activity_588675	all_disease	81.13	33.53	1	0.6272	built_models/moldata/GraphConv/0921-2134/
activity_588676	all_disease	77.1	27.51	1.69	0.5541	built_models/moldata/GraphConv/0921-2134/
activity_1511	all_disease	63.6	57.87	0.93	0.6674	built_models/moldata/GraphConv/0921-2134/
activity_1672	all_disease	83.1	70.89	3.22	0.8628	built_models/moldata/GraphConv/0921-2134/
activity_2550	all_disease	94.21	50	1.6	0.8031	built_models/moldata/GraphConv/0921-2134/
activity_2553	all_disease	77.43	65.29	3.41	0.7808	built_models/moldata/GraphConv/0921-2134/
activity_2648	all_disease	82.8	74.59	1.73	0.8619	built_models/moldata/GraphConv/0921-2134/
activity_463111	all_disease	73.89	68.73	3.17	0.7718	built_models/moldata/GraphConv/0921-2134/
activity_463165	all_disease	69.21	84.34	1.48	0.8461	built_models/moldata/GraphConv/0921-2134/
activity_2156	all_disease	75.01	76.12	3.94	0.8305	built_models/moldata/GraphConv/0921-2134/
activity_2227	all_disease	80.21	48.72	0.95	0.6936	built_models/moldata/GraphConv/0921-2134/
activity_2239	all_disease	70.51	71.58	1.45	0.7822	built_models/moldata/GraphConv/0921-2134/
activity_624037	all_disease	80.13	66.67	0.77	0.8284	built_models/moldata/GraphConv/0921-2134/
activity_624038	all_disease	75.4	28.12	0.39	0.5516	built_models/moldata/GraphConv/0921-2134/
activity_624040	all_disease	75.52	64.75	1.69	0.7677	built_models/moldata/GraphConv/0921-2134/
activity_624125	all_disease	82.65	59.18	3.49	0.7731	built_models/moldata/GraphConv/0921-2134/
activity_624126	all_disease	23.47	84.62	0.45	0.5686	built_models/moldata/GraphConv/0921-2134/
activity_624127	all_disease	75.88	66.67	0.46	0.7731	built_models/moldata/GraphConv/0921-2134/
activity_624466	all_disease	65.19	81.37	4.49	0.7989	built_models/moldata/GraphConv/0921-2134/
activity_624467	all_disease	81.2	58.41	3.56	0.7949	built_models/moldata/GraphConv/0921-2134/
activity_602247	all_disease	87.11	30.43	0.15	0.6893	built_models/moldata/GraphConv/0921-2134/
activity_602248	all_disease	70.64	53.07	0.86	0.6768	built_models/moldata/GraphConv/0921-2134/
activity_602250	all_disease	58.51	52.12	0.87	0.5705	built_models/moldata/GraphConv/0921-2134/
activity_588814	all_disease	87.83	41.27	1.17	0.7243	built_models/moldata/GraphConv/0921-2134/
activity_588819	all_disease	46.8	60.61	0.1	0.5289	built_models/moldata/GraphConv/0921-2134/
activity_588852	all_disease	60.88	79.86	3.12	0.7886	built_models/moldata/GraphConv/0921-2134/
activity_504634	all_disease	55.97	69.44	0.17	0.6802	built_models/moldata/GraphConv/0921-2134/
activity_504692	all_disease	57.85	62.44	0.94	0.6617	built_models/moldata/GraphConv/0921-2134/
activity_504454	all_disease	88.5	47.29	2.47	0.7838	built_models/moldata/GraphConv/0921-2134/
activity_652048	all_disease	67.28	62.55	1.29	0.6905	built_models/moldata/GraphConv/0921-2134/
activity_652051	all_disease	68.37	58.3	1.24	0.6892	built_models/moldata/GraphConv/0921-2134/
activity_493056	all_disease	51.48	52.24	0.69	0.5222	built_models/moldata/GraphConv/0921-2134/
activity_493084	all_disease	79.41	88.24	1.15	0.9207	built_models/moldata/GraphConv/0921-2134/
activity_504660	all_disease	76.82	74.43	3.48	0.8255	built_models/moldata/GraphConv/0921-2134/
activity_652054	all_disease	77.57	63.57	9	0.7707	built_models/moldata/GraphConv/0921-2134/
activity_624463	all_disease	87.68	78.4	2.1	0.921	built_models/moldata/GraphConv/0921-2134/
activity_504651	all_disease	46.32	75	0.04	0.7251	built_models/moldata/GraphConv/0921-2134/
activity_624465	all_disease	60.75	88.24	0.1	0.8771	built_models/moldata/GraphConv/0921-2134/
activity_504652	all_disease	85.4	25.41	5.77	0.617	built_models/moldata/GraphConv/0921-2134/
activity_624464	all_disease	86.2	73.86	1.28	0.8681	built_models/moldata/GraphConv/0921-2134/
activity_624291	all_disease	75.42	23.08	0.04	0.607	built_models/moldata/GraphConv/0921-2134/
activity_485347	all_disease	96.89	0.88	0.12	0.527	built_models/moldata/GraphConv/0921-2134/
activity_485344	all_disease	22.65	87.99	2.54	0.6748	built_models/moldata/GraphConv/0921-2134/
activity_485358	all_disease	87.97	68.72	4.04	0.841	built_models/moldata/GraphConv/0921-2134/
activity_492947	all_disease	85.07	75	0.06	0.8744	built_models/moldata/GraphConv/0921-2134/
activity_504810	all_disease	68.1	56.06	0.36	0.6724	built_models/moldata/GraphConv/0921-2134/
activity_504812	all_disease	64.96	59.09	0.35	0.6777	built_models/moldata/GraphConv/0921-2134/
activity_540275	all_disease	79.38	60.87	0.47	0.7921	built_models/moldata/GraphConv/0921-2134/
activity_540277	all_disease	75.23	33.33	0.03	0.5007	built_models/moldata/GraphConv/0921-2134/
activity_493036	all_disease	87.58	56.16	1.03	0.8454	built_models/moldata/GraphConv/0921-2134/
activity_1469	all_disease	84.3	73.91	0.36	0.8926	built_models/moldata/GraphConv/0921-2134/
activity_1479	all_disease	29.53	93.44	0.27	0.7861	built_models/moldata/GraphConv/0921-2134/
activity_720552	all_disease	75.83	43.06	22.96	0.6766	built_models/moldata/GraphConv/0921-2134/
activity_720719	all_disease	77	69.57	11.11	0.7917	built_models/moldata/GraphConv/0921-2134/
activity_720725	all_disease	69.68	63.04	18.59	0.7439	built_models/moldata/GraphConv/0921-2134/
activity_743053	all_disease	60	79.31	9.02	0.7967	built_models/moldata/GraphConv/0921-2134/
activity_743054	all_disease	59.31	59.26	14.41	0.6261	built_models/moldata/GraphConv/0921-2134/
activity_743063	all_disease	66.27	80.82	27.31	0.7739	built_models/moldata/GraphConv/0921-2134/
activity_743067	all_disease	72.46	47.83	20.18	0.6384	built_models/moldata/GraphConv/0921-2134/
activity_743077	all_disease	67.24	68.29	12.56	0.7745	built_models/moldata/GraphConv/0921-2134/
activity_743078	all_disease	73.11	64	21.48	0.7798	built_models/moldata/GraphConv/0921-2134/
activity_743091	all_disease	68.3	58.62	19.1	0.7233	built_models/moldata/GraphConv/0921-2134/
activity_743122	all_disease	75.83	62.24	36.09	0.8292	built_models/moldata/GraphConv/0921-2134/
activity_743139	all_disease	72.77	73.91	22.67	0.8002	built_models/moldata/GraphConv/0921-2134/
activity_743140	all_disease	60.69	74.29	11.21	0.7683	built_models/moldata/GraphConv/0921-2134/
activity_1159523	all_disease	48.84	89.58	28.96	0.742	built_models/moldata/GraphConv/0921-2134/
activity_1159528	all_disease	66.78	76.14	27.35	0.7509	built_models/moldata/GraphConv/0921-2134/
activity_1159531	all_disease	54.22	52.94	4.71	0.6172	built_models/moldata/GraphConv/0921-2134/
activity_1159555	all_disease	65.4	69.44	36.41	0.7353	built_models/moldata/GraphConv/0921-2134/
activity_1224892	all_disease	45.07	88.89	24.13	0.6936	built_models/moldata/GraphConv/0921-2134/
activity_1224893	all_disease	64.41	78.95	9.8	0.7342	built_models/moldata/GraphConv/0921-2134/
activity_1224894	all_disease	78	66.67	2.99	0.8039	built_models/moldata/GraphConv/0921-2134/
activity_1224895	all_disease	46.67	79.63	11.68	0.7375	built_models/moldata/GraphConv/0921-2134/
activity_1224896	all_disease	72.61	52.73	16.57	0.7047	built_models/moldata/GraphConv/0921-2134/
activity_1259247	all_disease	63.39	76.23	37.2	0.7534	built_models/moldata/GraphConv/0921-2134/
activity_1259248	all_disease	69.56	69.32	30.65	0.744	built_models/moldata/GraphConv/0921-2134/
activity_1259387	all_disease	59.94	89.29	8.56	0.8349	built_models/moldata/GraphConv/0921-2134/
activity_1259390	all_disease	68.92	42.86	1.49	0.7294	built_models/moldata/GraphConv/0921-2134/
activity_1259391	all_disease	76.35	100	6.36	0.9725	built_models/moldata/GraphConv/0921-2134/
activity_1259392	all_disease	59.87	85.35	45.89	0.7393	built_models/moldata/GraphConv/0921-2134/
activity_1259393	all_disease	54.65	100	0.31	1	built_models/moldata/GraphConv/0921-2134/
activity_1259394	all_disease	60.15	85.71	4.43	0.8053	built_models/moldata/GraphConv/0921-2134/
activity_1259395	all_disease	61.62	77.5	11.57	0.788	built_models/moldata/GraphConv/0921-2134/
activity_1259396	all_disease	59.3	86.52	29.17	0.7535	built_models/moldata/GraphConv/0921-2134/
activity_1259401	all_disease	59.45	79.41	24.77	0.7184	built_models/moldata/GraphConv/0921-2134/
activity_1259402	all_disease	59.21	81.08	13.1	0.8058	built_models/moldata/GraphConv/0921-2134/
activity_1259403	all_disease	54.66	88.24	34.43	0.7175	built_models/moldata/GraphConv/0921-2134/
activity_1259404	all_disease	61.36	91.3	12.57	0.8599	built_models/moldata/GraphConv/0921-2134/
activity_1347030	all_disease	60.96	61.54	2.96	0.6131	built_models/moldata/GraphConv/0921-2134/
activity_1347031	all_disease	64.02	90.55	39.79	0.8019	built_models/moldata/GraphConv/0921-2134/
activity_1347032	all_disease	60.98	72.94	23.57	0.7014	built_models/moldata/GraphConv/0921-2134/
activity_1347033	all_disease	70.8	88.93	64.68	0.8058	built_models/moldata/GraphConv/0921-2134/
activity_1347036	all_disease	73.22	88.24	7.61	0.9044	built_models/moldata/GraphConv/0921-2134/
activity_1347038	all_disease	64.04	75	3.63	0.7069	built_models/moldata/GraphConv/0921-2134/
activity_1159518	all_disease	86.76	50	4.82	0.769	built_models/moldata/GraphConv/0921-2134/
activity_1159519	all_disease	66.43	87.5	6.86	0.8074	built_models/moldata/GraphConv/0921-2134/
activity_743199	all_disease	75.35	63.27	22.96	0.7938	built_models/moldata/GraphConv/0921-2134/
activity_743219	all_disease	55.56	83.21	36.95	0.7113	built_models/moldata/GraphConv/0921-2134/
activity_743226	all_disease	84.45	53.85	8.75	0.7257	built_models/moldata/GraphConv/0921-2134/
activity_743227	all_disease	78.61	64.29	7.44	0.822	built_models/moldata/GraphConv/0921-2134/
activity_743228	all_disease	54.92	72.73	13.99	0.7188	built_models/moldata/GraphConv/0921-2134/
activity_743239	all_disease	50.4	73.91	5.35	0.6624	built_models/moldata/GraphConv/0921-2134/
activity_743240	all_disease	68.79	73.68	16.47	0.7742	built_models/moldata/GraphConv/0921-2134/
activity_743241	all_disease	83.72	33.33	1.11	0.735	built_models/moldata/GraphConv/0921-2134/
activity_743242	all_disease	47.75	58.33	2.6	0.6733	built_models/moldata/GraphConv/0921-2134/

## Sheet: cancer
AID	run_type	accuracy_score	recall_score	precision_score	roc_auc_score	model_dir
cancer	cancer	73.31	63.92	3.63	0.7648	built_models/moldata/GraphConv/0921-2134/
activity_1554	cancer	81.97	77.65	1.21	0.8603	built_models/moldata/GraphConv/0921-2134/
activity_1085	cancer	88.39	66.43	2.93	0.8294	built_models/moldata/GraphConv/0921-2134/
activity_781	cancer	87.46	48.86	2.51	0.7353	built_models/moldata/GraphConv/0921-2134/
activity_422	cancer	63.73	78.38	0.41	0.769	built_models/moldata/GraphConv/0921-2134/
activity_1224905	cancer	84.97	77.09	3.11	0.8957	built_models/moldata/GraphConv/0921-2134/
activity_624256	cancer	63.68	66.87	2.41	0.707	built_models/moldata/GraphConv/0921-2134/
activity_588579	cancer	88.97	72.49	5.94	0.894	built_models/moldata/GraphConv/0921-2134/
activity_743255	cancer	72.66	91.85	1.35	0.9313	built_models/moldata/GraphConv/0921-2134/
activity_588591	cancer	81.31	77.83	7.49	0.8778	built_models/moldata/GraphConv/0921-2134/
activity_588590	cancer	68.31	82.92	4.21	0.849	built_models/moldata/GraphConv/0921-2134/
activity_504327	cancer	87.07	56	1.96	0.7901	built_models/moldata/GraphConv/0921-2134/
activity_504648	cancer	82.66	71.77	1.55	0.8695	built_models/moldata/GraphConv/0921-2134/
activity_624246	cancer	89.4	50	0.09	0.7797	built_models/moldata/GraphConv/0921-2134/
activity_720504	cancer	82.34	52.68	9.4	0.7465	built_models/moldata/GraphConv/0921-2134/
activity_651725	cancer	86.03	81.61	4.55	0.9097	built_models/moldata/GraphConv/0921-2134/
activity_651768	cancer	85.77	77.66	4.01	0.8993	built_models/moldata/GraphConv/0921-2134/
activity_504444	cancer	77.53	59.51	8.01	0.7762	built_models/moldata/GraphConv/0921-2134/
activity_651550	cancer	98.97	0.65	0.43	0.5778	built_models/moldata/GraphConv/0921-2134/
activity_540263	cancer	67.63	62.5	0.05	0.6661	built_models/moldata/GraphConv/0921-2134/
activity_485314	cancer	84.57	62.33	8.85	0.8266	built_models/moldata/GraphConv/0921-2134/
activity_651724	cancer	85.53	81.78	3.69	0.9137	built_models/moldata/GraphConv/0921-2134/
activity_488837	cancer	66.34	0	0	0.433	built_models/moldata/GraphConv/0921-2134/
activity_540303	cancer	69.67	64.71	0.7	0.753	built_models/moldata/GraphConv/0921-2134/
activity_485298	cancer	66.83	79.49	0.6	0.7774	built_models/moldata/GraphConv/0921-2134/
activity_504706	cancer	79.79	76.19	0.27	0.8324	built_models/moldata/GraphConv/0921-2134/
activity_2662	cancer	92.35	75	0.53	0.905	built_models/moldata/GraphConv/0921-2134/
activity_2549	cancer	64.54	86.64	1.85	0.8517	built_models/moldata/GraphConv/0921-2134/
activity_485360	cancer	50.94	87.7	1.84	0.8314	built_models/moldata/GraphConv/0921-2134/
activity_445	cancer	88.34	30.77	0.31	0.6684	built_models/moldata/GraphConv/0921-2134/
activity_602429	cancer	61.54	78.69	0.98	0.8052	built_models/moldata/GraphConv/0921-2134/
activity_624352	cancer	78.74	70.38	3.6	0.8245	built_models/moldata/GraphConv/0921-2134/
activity_651699	cancer	78.52	70.31	2.18	0.8364	built_models/moldata/GraphConv/0921-2134/
activity_651647	cancer	85.83	69.44	0.47	0.8488	built_models/moldata/GraphConv/0921-2134/
activity_1347056	cancer	62.02	73.63	2.71	0.7485	built_models/moldata/GraphConv/0921-2134/
activity_588405	cancer	66.24	83.03	5.88	0.8236	built_models/moldata/GraphConv/0921-2134/
activity_588493	cancer	72.39	73.54	2.31	0.7955	built_models/moldata/GraphConv/0921-2134/
activity_489030	cancer	46.38	88.79	1.72	0.823	built_models/moldata/GraphConv/0921-2134/
activity_489031	cancer	55.62	45.24	0.27	0.528	built_models/moldata/GraphConv/0921-2134/
activity_588692	cancer	61.29	75	0.57	0.763	built_models/moldata/GraphConv/0921-2134/
activity_602393	cancer	79.17	72.47	7.46	0.845	built_models/moldata/GraphConv/0921-2134/
activity_2099	cancer	64.94	45.71	0.15	0.5966	built_models/moldata/GraphConv/0921-2134/
activity_1021	cancer	45.88	80.47	1.58	0.7279	built_models/moldata/GraphConv/0921-2134/
activity_1022	cancer	75.29	67.39	4.94	0.7896	built_models/moldata/GraphConv/0921-2134/
activity_602162	cancer	95.91	5.06	0.27	0.5683	built_models/moldata/GraphConv/0921-2134/
activity_588499	cancer	86.33	70.59	1.44	0.8893	built_models/moldata/GraphConv/0921-2134/
activity_504490	cancer	34.23	65.14	0.32	0.501	built_models/moldata/GraphConv/0921-2134/
activity_2557	cancer	57.81	48.48	0.24	0.553	built_models/moldata/GraphConv/0921-2134/
activity_624170	cancer	72.56	85.44	0.85	0.8486	built_models/moldata/GraphConv/0921-2134/
activity_624171	cancer	63.07	87.5	0.92	0.8561	built_models/moldata/GraphConv/0921-2134/
activity_1347076	cancer	88.15	21.09	12.83	0.7128	built_models/moldata/GraphConv/0921-2134/
activity_1347075	cancer	78.58	60.09	5.64	0.7828	built_models/moldata/GraphConv/0921-2134/
activity_504891	cancer	91.33	75	0.11	0.9758	built_models/moldata/GraphConv/0921-2134/
activity_540317	cancer	86.08	75.18	4.35	0.8814	built_models/moldata/GraphConv/0921-2134/
activity_624202	cancer	78.68	73.03	3.53	0.841	built_models/moldata/GraphConv/0921-2134/
activity_720707	cancer	74.64	84.62	0.23	0.8922	built_models/moldata/GraphConv/0921-2134/
activity_720708	cancer	84.83	55.56	0.62	0.8053	built_models/moldata/GraphConv/0921-2134/
activity_720709	cancer	54.68	96.81	0.54	0.9239	built_models/moldata/GraphConv/0921-2134/
activity_720711	cancer	80.07	71.15	0.49	0.868	built_models/moldata/GraphConv/0921-2134/
activity_504332	cancer	77.28	58.38	30.27	0.7616	built_models/moldata/GraphConv/0921-2134/
activity_540253	cancer	81.75	56.25	0.31	0.7856	built_models/moldata/GraphConv/0921-2134/
activity_504842	cancer	78.15	85.71	0.17	0.8909	built_models/moldata/GraphConv/0921-2134/
activity_1347165	cancer	92.55	8.27	24.3	0.7409	built_models/moldata/GraphConv/0921-2134/
activity_2417	cancer	82.14	13.52	3.87	0.4887	built_models/moldata/GraphConv/0921-2134/
activity_1454	cancer	64.12	78.57	1.25	0.8101	built_models/moldata/GraphConv/0921-2134/
activity_504462	cancer	82.19	67.66	2.22	0.8337	built_models/moldata/GraphConv/0921-2134/
activity_463195	cancer	75.76	69.61	4.64	0.8086	built_models/moldata/GraphConv/0921-2134/
activity_485346	cancer	64.84	80.85	8.53	0.8073	built_models/moldata/GraphConv/0921-2134/
activity_1496	cancer	64.48	81.15	1.01	0.8048	built_models/moldata/GraphConv/0921-2134/
activity_1259310	cancer	90.79	20.25	0.39	0.6076	built_models/moldata/GraphConv/0921-2134/
activity_652017	cancer	73.21	55.21	2.19	0.6904	built_models/moldata/GraphConv/0921-2134/
activity_488922	cancer	88.92	51.8	6.41	0.8327	built_models/moldata/GraphConv/0921-2134/
activity_624483	cancer	96.14	0.07	20	0.5819	built_models/moldata/GraphConv/0921-2134/
activity_950	cancer	83.66	33.33	0.17	0.6705	built_models/moldata/GraphConv/0921-2134/
activity_951	cancer	76.03	33.33	0.12	0.6316	built_models/moldata/GraphConv/0921-2134/
activity_952	cancer	84.29	57.14	0.1	0.7883	built_models/moldata/GraphConv/0921-2134/
activity_1007	cancer	45.31	63.64	0.05	0.6995	built_models/moldata/GraphConv/0921-2134/
activity_1008	cancer	87.2	57.58	0.6	0.7554	built_models/moldata/GraphConv/0921-2134/
activity_1009	cancer	92.63	11.11	0.22	0.5773	built_models/moldata/GraphConv/0921-2134/
activity_651819	cancer	41	55.86	0.28	0.4956	built_models/moldata/GraphConv/0921-2134/
activity_493098	cancer	87.63	63.18	3.8	0.8525	built_models/moldata/GraphConv/0921-2134/
activity_1259374	cancer	84.21	62.11	3.29	0.7979	built_models/moldata/GraphConv/0921-2134/
activity_1259422	cancer	64.84	76.73	3.52	0.7706	built_models/moldata/GraphConv/0921-2134/
activity_686940	cancer	76.39	58.24	2.72	0.73	built_models/moldata/GraphConv/0921-2134/
activity_720508	cancer	43.45	73.53	0.22	0.6229	built_models/moldata/GraphConv/0921-2134/
activity_720509	cancer	48.48	74.07	0.39	0.6754	built_models/moldata/GraphConv/0921-2134/
activity_720582	cancer	77	75.5	2.03	0.8375	built_models/moldata/GraphConv/0921-2134/
activity_720648	cancer	71.42	68.63	2.13	0.7856	built_models/moldata/GraphConv/0921-2134/
activity_720700	cancer	42.63	66.48	1.01	0.5688	built_models/moldata/GraphConv/0921-2134/
activity_720704	cancer	58.56	52.94	0.27	0.6048	built_models/moldata/GraphConv/0921-2134/
activity_602396	cancer	88.6	55.77	1.34	0.817	built_models/moldata/GraphConv/0921-2134/
activity_588352	cancer	87.38	54.79	1.72	0.802	built_models/moldata/GraphConv/0921-2134/
activity_588354	cancer	92.62	42.86	1.66	0.832	built_models/moldata/GraphConv/0921-2134/
activity_435030	cancer	75.82	81.82	1.27	0.8384	built_models/moldata/GraphConv/0921-2134/
activity_449728	cancer	67.83	83.87	1	0.8489	built_models/moldata/GraphConv/0921-2134/
activity_463141	cancer	70.69	40.74	0.12	0.6716	built_models/moldata/GraphConv/0921-2134/
activity_463210	cancer	82.71	51.61	0.29	0.7613	built_models/moldata/GraphConv/0921-2134/
activity_2796	cancer	81.93	71.13	10.01	0.8487	built_models/moldata/GraphConv/0921-2134/
activity_2280	cancer	82.19	62.84	2.4	0.7925	built_models/moldata/GraphConv/0921-2134/
activity_1987	cancer	76.44	60.87	0.57	0.7628	built_models/moldata/GraphConv/0921-2134/
activity_2235	cancer	68.39	80.73	3.49	0.8247	built_models/moldata/GraphConv/0921-2134/
activity_1899	cancer	75.5	77.78	2.4	0.8399	built_models/moldata/GraphConv/0921-2134/
activity_1950	cancer	65.59	67.18	0.84	0.7056	built_models/moldata/GraphConv/0921-2134/
activity_1700	cancer	84.53	62.69	0.91	0.7927	built_models/moldata/GraphConv/0921-2134/
activity_1789	cancer	84.88	54.79	3.54	0.7552	built_models/moldata/GraphConv/0921-2134/
activity_1825	cancer	80.27	63.45	2.55	0.7923	built_models/moldata/GraphConv/0921-2134/
activity_1416	cancer	48.28	69.23	0.19	0.6334	built_models/moldata/GraphConv/0921-2134/
activity_1446	cancer	51.99	81.64	1.86	0.7618	built_models/moldata/GraphConv/0921-2134/
activity_1481	cancer	46.9	87.23	0.84	0.7896	built_models/moldata/GraphConv/0921-2134/
activity_1486	cancer	43.7	83.07	1.69	0.7385	built_models/moldata/GraphConv/0921-2134/
activity_1515	cancer	65.83	46.43	0.28	0.5549	built_models/moldata/GraphConv/0921-2134/
activity_602329	cancer	89.2	92.31	1.82	0.9534	built_models/moldata/GraphConv/0921-2134/
activity_652154	cancer	84.02	53.39	5.14	0.7715	built_models/moldata/GraphConv/0921-2134/
activity_652163	cancer	48.57	71.43	0.18	0.7311	built_models/moldata/GraphConv/0921-2134/
activity_651710	cancer	83.4	80.13	2.69	0.8933	built_models/moldata/GraphConv/0921-2134/
activity_686996	cancer	34.43	90.68	1.2	0.8089	built_models/moldata/GraphConv/0921-2134/
activity_651661	cancer	77.03	66.04	2.8	0.7845	built_models/moldata/GraphConv/0921-2134/
activity_504523	cancer	35.05	86.89	0.24	0.7115	built_models/moldata/GraphConv/0921-2134/
activity_504423	cancer	75.67	68.57	0.29	0.806	built_models/moldata/GraphConv/0921-2134/
activity_602342	cancer	70.87	61.8	0.65	0.7115	built_models/moldata/GraphConv/0921-2134/
activity_623901	cancer	95.06	12.77	0.43	0.6327	built_models/moldata/GraphConv/0921-2134/
activity_488899	cancer	76.32	78.28	4.5	0.8666	built_models/moldata/GraphConv/0921-2134/
activity_540336	cancer	83.61	32.76	0.36	0.6592	built_models/moldata/GraphConv/0921-2134/
activity_743445	cancer	55.09	77.46	1.21	0.7596	built_models/moldata/GraphConv/0921-2134/
activity_588334	cancer	80.84	74.6	2.45	0.8503	built_models/moldata/GraphConv/0921-2134/
activity_686992	cancer	88.34	18	0.39	0.6243	built_models/moldata/GraphConv/0921-2134/
activity_2016	cancer	71.49	38.5	0.8	0.5773	built_models/moldata/GraphConv/0921-2134/
activity_2025	cancer	73.94	31.18	0.36	0.546	built_models/moldata/GraphConv/0921-2134/
activity_2023	cancer	71.3	71.2	0.98	0.7823	built_models/moldata/GraphConv/0921-2134/
activity_2066	cancer	59.95	33.33	0.02	0.384	built_models/moldata/GraphConv/0921-2134/
activity_2029	cancer	79.08	33.33	0.12	0.6748	built_models/moldata/GraphConv/0921-2134/
activity_2462	cancer	88.16	44.83	0.35	0.8035	built_models/moldata/GraphConv/0921-2134/
activity_2716	cancer	95.56	4.62	1.52	0.5173	built_models/moldata/GraphConv/0921-2134/
activity_2718	cancer	69.78	70.59	0.39	0.7467	built_models/moldata/GraphConv/0921-2134/
activity_2650	cancer	84.26	63.16	0.5	0.8185	built_models/moldata/GraphConv/0921-2134/
activity_2717	cancer	73.78	82.82	4.4	0.8571	built_models/moldata/GraphConv/0921-2134/
activity_651702	cancer	76.65	64.94	2.24	0.7856	built_models/moldata/GraphConv/0921-2134/
activity_588497	cancer	99.05	7.5	2.19	0.6584	built_models/moldata/GraphConv/0921-2134/
activity_588501	cancer	91.1	52.78	1.16	0.7962	built_models/moldata/GraphConv/0921-2134/
activity_2690	cancer	72.76	57.78	0.3	0.7199	built_models/moldata/GraphConv/0921-2134/
activity_1347041	cancer	62.49	77.66	0.41	0.7854	built_models/moldata/GraphConv/0921-2134/
activity_686979	cancer	66.24	82.28	32.72	0.8085	built_models/moldata/GraphConv/0921-2134/
activity_686978	cancer	69.8	81.55	42.56	0.8191	built_models/moldata/GraphConv/0921-2134/
activity_588453	cancer	84.25	69.84	6.39	0.8581	built_models/moldata/GraphConv/0921-2134/
activity_588456	cancer	96.65	90.91	0.85	0.9882	built_models/moldata/GraphConv/0921-2134/
activity_588795	cancer	80.47	88.68	2.76	0.9274	built_models/moldata/GraphConv/0921-2134/
activity_602179	cancer	78.4	64.15	0.45	0.7954	built_models/moldata/GraphConv/0921-2134/
activity_686970	cancer	78.72	64.94	7.17	0.7951	built_models/moldata/GraphConv/0921-2134/
activity_686971	cancer	72.25	72.68	7.68	0.7974	built_models/moldata/GraphConv/0921-2134/
activity_2528	cancer	72.7	86.15	1.24	0.9022	built_models/moldata/GraphConv/0921-2134/
activity_485290	cancer	85.51	56.59	1.56	0.7878	built_models/moldata/GraphConv/0921-2134/
activity_2517	cancer	66.4	84.16	1.49	0.8511	built_models/moldata/GraphConv/0921-2134/
activity_624296	cancer	72.72	71.29	10.9	0.7957	built_models/moldata/GraphConv/0921-2134/
activity_624297	cancer	74.93	70.13	6.8	0.7943	built_models/moldata/GraphConv/0921-2134/
activity_463254	cancer	78.54	100	0.12	0.986	built_models/moldata/GraphConv/0921-2134/
activity_504466	cancer	93.22	53.93	9.93	0.8793	built_models/moldata/GraphConv/0921-2134/
activity_504467	cancer	78.48	63.27	12.87	0.798	built_models/moldata/GraphConv/0921-2134/
activity_652105	cancer	75.02	82.29	5.79	0.8691	built_models/moldata/GraphConv/0921-2134/
activity_1768	cancer	87.37	44.87	1.07	0.8122	built_models/moldata/GraphConv/0921-2134/
activity_1452	cancer	73.55	78.95	0.27	0.8092	built_models/moldata/GraphConv/0921-2134/
activity_894	cancer	77.16	60.63	13.33	0.7761	built_models/moldata/GraphConv/0921-2134/
activity_902	cancer	68.54	75.71	2.94	0.7879	built_models/moldata/GraphConv/0921-2134/
activity_924	cancer	81.3	68.9	4.21	0.8297	built_models/moldata/GraphConv/0921-2134/
activity_881	cancer	87.84	72.94	3.18	0.8971	built_models/moldata/GraphConv/0921-2134/
activity_624204	cancer	73.03	84.16	0.82	0.8589	built_models/moldata/GraphConv/0921-2134/
activity_624354	cancer	79.27	71.84	4.63	0.8361	built_models/moldata/GraphConv/0921-2134/
activity_602244	cancer	85.11	62.44	2.36	0.8084	built_models/moldata/GraphConv/0921-2134/
activity_602261	cancer	86.48	69.52	3.61	0.8846	built_models/moldata/GraphConv/0921-2134/
activity_588458	cancer	60.91	85.38	2.73	0.8279	built_models/moldata/GraphConv/0921-2134/
activity_588489	cancer	72.3	69.78	1.24	0.7877	built_models/moldata/GraphConv/0921-2134/
activity_588621	cancer	96.17	37.14	2.82	0.8052	built_models/moldata/GraphConv/0921-2134/
activity_463190	cancer	83.6	47.64	6.94	0.7738	built_models/moldata/GraphConv/0921-2134/
activity_463212	cancer	77.6	70.74	4.16	0.828	built_models/moldata/GraphConv/0921-2134/
activity_435022	cancer	88.09	31.82	1.11	0.6937	built_models/moldata/GraphConv/0921-2134/
activity_435003	cancer	80.86	58.77	2.02	0.7742	built_models/moldata/GraphConv/0921-2134/
activity_1443	cancer	86.05	70	2.34	0.8807	built_models/moldata/GraphConv/0921-2134/
activity_1347034	cancer	59.09	69.33	17.39	0.7037	built_models/moldata/GraphConv/0921-2134/
activity_1347037	cancer	56.7	71.43	8.17	0.7081	built_models/moldata/GraphConv/0921-2134/
activity_602440	cancer	82.11	69.38	3.08	0.8109	built_models/moldata/GraphConv/0921-2134/
activity_588413	cancer	70.06	60.06	2.04	0.7111	built_models/moldata/GraphConv/0921-2134/
activity_652257	cancer	64.08	84.53	4.46	0.8338	built_models/moldata/GraphConv/0921-2134/
activity_686964	cancer	36.07	78.08	0.45	0.6887	built_models/moldata/GraphConv/0921-2134/
activity_687016	cancer	71.09	45.1	1.33	0.6168	built_models/moldata/GraphConv/0921-2134/
activity_720702	cancer	63.21	80.82	0.8	0.8261	built_models/moldata/GraphConv/0921-2134/
activity_651957	cancer	83.74	61.79	1.18	0.8216	built_models/moldata/GraphConv/0921-2134/
activity_652010	cancer	41.44	87.9	1.52	0.7767	built_models/moldata/GraphConv/0921-2134/
activity_652039	cancer	63	92.91	2.45	0.881	built_models/moldata/GraphConv/0921-2134/
activity_624377	cancer	61.96	79	0.54	0.7983	built_models/moldata/GraphConv/0921-2134/
activity_651572	cancer	84.75	60.4	1.05	0.8047	built_models/moldata/GraphConv/0921-2134/
activity_602123	cancer	66.19	69.92	1.29	0.7359	built_models/moldata/GraphConv/0921-2134/
activity_504700	cancer	47.88	61.11	0.06	0.6197	built_models/moldata/GraphConv/0921-2134/
activity_504707	cancer	64.21	32.35	0.09	0.4899	built_models/moldata/GraphConv/0921-2134/
activity_504766	cancer	55.45	58.93	1.22	0.6048	built_models/moldata/GraphConv/0921-2134/
activity_2130	cancer	72.78	75.29	1.53	0.817	built_models/moldata/GraphConv/0921-2134/
activity_2174	cancer	50.65	86.36	0.37	0.7935	built_models/moldata/GraphConv/0921-2134/
activity_2177	cancer	65.14	80.28	1.05	0.7944	built_models/moldata/GraphConv/0921-2134/
activity_2234	cancer	80.58	64.52	0.66	0.7954	built_models/moldata/GraphConv/0921-2134/
activity_2057	cancer	47.33	91.1	1.79	0.8483	built_models/moldata/GraphConv/0921-2134/
activity_2129	cancer	69.82	80.45	2.96	0.8286	built_models/moldata/GraphConv/0921-2134/
activity_1947	cancer	77.03	85	1.68	0.8953	built_models/moldata/GraphConv/0921-2134/
activity_1974	cancer	53.78	87.29	2.16	0.8303	built_models/moldata/GraphConv/0921-2134/
activity_1321	cancer	71.56	42.19	1.74	0.5792	built_models/moldata/GraphConv/0921-2134/
activity_631	cancer	55.85	81.82	0.74	0.7937	built_models/moldata/GraphConv/0921-2134/
activity_731	cancer	78.82	68.18	0.85	0.8271	built_models/moldata/GraphConv/0921-2134/
activity_920	cancer	78.99	67.92	1.37	0.8281	built_models/moldata/GraphConv/0921-2134/
activity_932	cancer	85.51	63.43	9.1	0.8434	built_models/moldata/GraphConv/0921-2134/
activity_1529	cancer	41.35	67.15	1.84	0.5628	built_models/moldata/GraphConv/0921-2134/
activity_1530	cancer	97.34	24.56	3.85	0.794	built_models/moldata/GraphConv/0921-2134/
activity_1531	cancer	59.41	70.78	2.55	0.7115	built_models/moldata/GraphConv/0921-2134/
activity_758	cancer	86.25	21.05	0.12	0.6108	built_models/moldata/GraphConv/0921-2134/
activity_760	cancer	87.03	58.73	1.18	0.8075	built_models/moldata/GraphConv/0921-2134/
activity_761	cancer	92.6	38.89	1.59	0.7504	built_models/moldata/GraphConv/0921-2134/
activity_757	cancer	86.69	56.25	1.4	0.7807	built_models/moldata/GraphConv/0921-2134/
activity_759	cancer	85.17	57.41	0.87	0.7884	built_models/moldata/GraphConv/0921-2134/
activity_764	cancer	92.04	31.43	0.58	0.7037	built_models/moldata/GraphConv/0921-2134/
activity_1325	cancer	86.14	20	0.12	0.6889	built_models/moldata/GraphConv/0921-2134/
activity_1326	cancer	75.35	76.19	0.26	0.8021	built_models/moldata/GraphConv/0921-2134/
activity_493014	cancer	81.43	58.82	0.23	0.7359	built_models/moldata/GraphConv/0921-2134/
activity_588664	cancer	32.37	87.75	0.71	0.7125	built_models/moldata/GraphConv/0921-2134/
activity_624291	cancer	83.22	15.38	0.04	0.5626	built_models/moldata/GraphConv/0921-2134/
activity_504810	cancer	73.33	48.48	0.38	0.6848	built_models/moldata/GraphConv/0921-2134/
activity_504812	cancer	71.99	51.52	0.38	0.6827	built_models/moldata/GraphConv/0921-2134/
activity_720552	cancer	69.5	59.72	21.83	0.6967	built_models/moldata/GraphConv/0921-2134/
activity_743053	cancer	66.05	75.86	10.14	0.7712	built_models/moldata/GraphConv/0921-2134/
activity_743054	cancer	54.89	55.56	12.45	0.6409	built_models/moldata/GraphConv/0921-2134/
activity_743063	cancer	62.33	80.82	25	0.7663	built_models/moldata/GraphConv/0921-2134/
activity_1159531	cancer	51.08	58.82	4.85	0.5958	built_models/moldata/GraphConv/0921-2134/
activity_1224894	cancer	73	83.33	3.01	0.8036	built_models/moldata/GraphConv/0921-2134/
activity_1224896	cancer	69.11	50.91	14.36	0.6242	built_models/moldata/GraphConv/0921-2134/
activity_1259401	cancer	55.81	77.94	22.84	0.6822	built_models/moldata/GraphConv/0921-2134/
activity_1259402	cancer	60.99	83.78	13.96	0.8367	built_models/moldata/GraphConv/0921-2134/
activity_1259403	cancer	47.46	86.55	30.75	0.6992	built_models/moldata/GraphConv/0921-2134/
activity_1259404	cancer	70.5	86.96	15.38	0.847	built_models/moldata/GraphConv/0921-2134/
activity_1159518	cancer	85.49	62.5	5.38	0.7696	built_models/moldata/GraphConv/0921-2134/
activity_1159519	cancer	60.31	81.25	5.49	0.7267	built_models/moldata/GraphConv/0921-2134/
activity_743239	cancer	58.32	52.17	4.63	0.6089	built_models/moldata/GraphConv/0921-2134/
activity_743240	cancer	61.81	65.79	12.63	0.7183	built_models/moldata/GraphConv/0921-2134/

## Sheet: nervous System
AID	run_type	accuracy_score	recall_score	precision_score	roc_auc_score	model_dir
nervous System	nervous System	72.23	61.79	2.43	0.739	built_models/moldata/GraphConv/0921-2135/
activity_2732	nervous System	86.45	38.08	10.66	0.7631	built_models/moldata/GraphConv/0921-2135/
activity_1236	nervous System	77.45	55.86	1	0.7131	built_models/moldata/GraphConv/0921-2135/
activity_1274	nervous System	33.53	82.54	0.85	0.6778	built_models/moldata/GraphConv/0921-2135/
activity_781	nervous System	85.05	45.45	1.96	0.7288	built_models/moldata/GraphConv/0921-2135/
activity_422	nervous System	63.32	75.68	0.39	0.7692	built_models/moldata/GraphConv/0921-2135/
activity_624417	nervous System	88.38	50.67	9.47	0.818	built_models/moldata/GraphConv/0921-2135/
activity_624418	nervous System	82.48	69.89	1.03	0.8197	built_models/moldata/GraphConv/0921-2135/
activity_652104	nervous System	67.38	79	3.85	0.807	built_models/moldata/GraphConv/0921-2135/
activity_651635	nervous System	72.89	80.35	4.8	0.8446	built_models/moldata/GraphConv/0921-2135/
activity_504845	nervous System	76.62	55.56	0.06	0.7249	built_models/moldata/GraphConv/0921-2135/
activity_624172	nervous System	89.47	0	0	0.2257	built_models/moldata/GraphConv/0921-2135/
activity_652106	nervous System	42.43	86.44	0.23	0.7413	built_models/moldata/GraphConv/0921-2135/
activity_2676	nervous System	52.81	93.51	0.49	0.8285	built_models/moldata/GraphConv/0921-2135/
activity_720551	nervous System	43.08	72.44	0.47	0.6472	built_models/moldata/GraphConv/0921-2135/
activity_720553	nervous System	62.77	68.55	1.81	0.7346	built_models/moldata/GraphConv/0921-2135/
activity_485313	nervous System	85.31	73.22	10.51	0.8854	built_models/moldata/GraphConv/0921-2135/
activity_485297	nervous System	84.28	73.8	12.16	0.8814	built_models/moldata/GraphConv/0921-2135/
activity_2315	nervous System	69.72	77.17	19.3	0.8082	built_models/moldata/GraphConv/0921-2135/
activity_880	nervous System	70.63	65.48	1.24	0.7295	built_models/moldata/GraphConv/0921-2135/
activity_1458	nervous System	88.57	59.09	13.16	0.8344	built_models/moldata/GraphConv/0921-2135/
activity_1487	nervous System	89.02	62.5	0.25	0.7859	built_models/moldata/GraphConv/0921-2135/
activity_1259318	nervous System	92.06	47.42	4.94	0.8542	built_models/moldata/GraphConv/0921-2135/
activity_624352	nervous System	77.25	70.85	3.39	0.8148	built_models/moldata/GraphConv/0921-2135/
activity_651699	nervous System	84.13	59.38	2.5	0.8356	built_models/moldata/GraphConv/0921-2135/
activity_1259313	nervous System	88.42	57.56	10.79	0.8082	built_models/moldata/GraphConv/0921-2135/
activity_489030	nervous System	48.2	89.09	1.79	0.8222	built_models/moldata/GraphConv/0921-2135/
activity_489031	nervous System	40.69	66.67	0.29	0.5481	built_models/moldata/GraphConv/0921-2135/
activity_1813	nervous System	61.98	81.27	2.32	0.8017	built_models/moldata/GraphConv/0921-2135/
activity_1814	nervous System	75.39	76.03	18.42	0.8298	built_models/moldata/GraphConv/0921-2135/
activity_940	nervous System	95	26.61	3.94	0.8032	built_models/moldata/GraphConv/0921-2135/
activity_1422	nervous System	62.16	85.92	2.87	0.8158	built_models/moldata/GraphConv/0921-2135/
activity_602162	nervous System	97.94	1.27	0.14	0.5391	built_models/moldata/GraphConv/0921-2135/
activity_488847	nervous System	66.1	37.44	0.7	0.5275	built_models/moldata/GraphConv/0921-2135/
activity_624170	nervous System	73.08	75.73	0.77	0.8156	built_models/moldata/GraphConv/0921-2135/
activity_624171	nervous System	71.46	81.25	1.11	0.8437	built_models/moldata/GraphConv/0921-2135/
activity_624414	nervous System	89.05	68.42	0.94	0.8535	built_models/moldata/GraphConv/0921-2135/
activity_624415	nervous System	47.06	50	0.01	0.2679	built_models/moldata/GraphConv/0921-2135/
activity_1347120	nervous System	51.21	86.16	0.81	0.7892	built_models/moldata/GraphConv/0921-2135/
activity_504891	nervous System	86.81	100	0.09	0.9929	built_models/moldata/GraphConv/0921-2135/
activity_540317	nervous System	87.71	69.71	4.58	0.8663	built_models/moldata/GraphConv/0921-2135/
activity_1463	nervous System	89.4	81.85	6.87	0.9426	built_models/moldata/GraphConv/0921-2135/
activity_1461	nervous System	77.57	69.23	4.06	0.8159	built_models/moldata/GraphConv/0921-2135/
activity_1457	nervous System	85.34	65.82	1.32	0.8762	built_models/moldata/GraphConv/0921-2135/
activity_588473	nervous System	84.17	60.38	2.29	0.7779	built_models/moldata/GraphConv/0921-2135/
activity_588475	nervous System	45.2	57.77	0.62	0.5512	built_models/moldata/GraphConv/0921-2135/
activity_463195	nervous System	74.03	69.04	4.31	0.8028	built_models/moldata/GraphConv/0921-2135/
activity_488922	nervous System	91.66	38.85	6.66	0.8355	built_models/moldata/GraphConv/0921-2135/
activity_2237	nervous System	73.98	70.9	1.68	0.8007	built_models/moldata/GraphConv/0921-2135/
activity_2247	nervous System	54.62	79.82	0.66	0.7288	built_models/moldata/GraphConv/0921-2135/
activity_1415	nervous System	35.26	72.45	0.4	0.5384	built_models/moldata/GraphConv/0921-2135/
activity_1423	nervous System	49.72	58.72	0.46	0.557	built_models/moldata/GraphConv/0921-2135/
activity_1439	nervous System	53.39	46.53	0.43	0.4956	built_models/moldata/GraphConv/0921-2135/
activity_1441	nervous System	27.9	71.68	0.41	0.5265	built_models/moldata/GraphConv/0921-2135/
activity_624263	nervous System	80.36	69.31	0.94	0.819	built_models/moldata/GraphConv/0921-2135/
activity_602438	nervous System	77.16	33.89	1.41	0.5762	built_models/moldata/GraphConv/0921-2135/
activity_720543	nervous System	83.62	76.23	3.03	0.8754	built_models/moldata/GraphConv/0921-2135/
activity_624169	nervous System	46.31	66.15	0.84	0.5797	built_models/moldata/GraphConv/0921-2135/
activity_602229	nervous System	78.34	50.25	1.26	0.7274	built_models/moldata/GraphConv/0921-2135/
activity_651719	nervous System	82.48	33.85	1	0.6694	built_models/moldata/GraphConv/0921-2135/
activity_504326	nervous System	80.4	73.51	1.68	0.8454	built_models/moldata/GraphConv/0921-2135/
activity_504357	nervous System	77.23	67.06	0.75	0.7598	built_models/moldata/GraphConv/0921-2135/
activity_434989	nervous System	78.81	55.08	1.51	0.7627	built_models/moldata/GraphConv/0921-2135/
activity_463079	nervous System	75.94	66.53	2.07	0.786	built_models/moldata/GraphConv/0921-2135/
activity_485270	nervous System	80.33	67.99	7.07	0.8261	built_models/moldata/GraphConv/0921-2135/
activity_2435	nervous System	77.56	70.43	1.13	0.8176	built_models/moldata/GraphConv/0921-2135/
activity_2445	nervous System	40.5	66.67	0.06	0.5277	built_models/moldata/GraphConv/0921-2135/
activity_2797	nervous System	79.42	72.16	1.06	0.8294	built_models/moldata/GraphConv/0921-2135/
activity_2300	nervous System	45.88	87.23	0.24	0.7969	built_models/moldata/GraphConv/0921-2135/
activity_1950	nervous System	72.99	56.49	0.9	0.6816	built_models/moldata/GraphConv/0921-2135/
activity_1789	nervous System	86.42	51.71	3.74	0.7706	built_models/moldata/GraphConv/0921-2135/
activity_1861	nervous System	66.67	60.46	2.12	0.6844	built_models/moldata/GraphConv/0921-2135/
activity_1304	nervous System	78.11	69.66	1.03	0.7952	built_models/moldata/GraphConv/0921-2135/
activity_1359	nervous System	76.18	53.45	0.95	0.7325	built_models/moldata/GraphConv/0921-2135/
activity_1424	nervous System	68.57	84.09	0.43	0.8339	built_models/moldata/GraphConv/0921-2135/
activity_1448	nervous System	86.44	56.16	1.1	0.7683	built_models/moldata/GraphConv/0921-2135/
activity_1481	nervous System	40.79	88.65	0.76	0.7791	built_models/moldata/GraphConv/0921-2135/
activity_1040	nervous System	83.01	47.97	3.38	0.7261	built_models/moldata/GraphConv/0921-2135/
activity_793	nervous System	57.33	82.91	2.07	0.7597	built_models/moldata/GraphConv/0921-2135/
activity_803	nervous System	88.3	32.84	1.03	0.6888	built_models/moldata/GraphConv/0921-2135/
activity_828	nervous System	69.96	56.58	0.78	0.6753	built_models/moldata/GraphConv/0921-2135/
activity_623870	nervous System	75.61	78.47	3.33	0.8367	built_models/moldata/GraphConv/0921-2135/
activity_743247	nervous System	49.98	65.22	0.2	0.6208	built_models/moldata/GraphConv/0921-2135/
activity_504523	nervous System	37.77	88.52	0.26	0.7192	built_models/moldata/GraphConv/0921-2135/
activity_488839	nervous System	91.19	66.67	0.07	0.8781	built_models/moldata/GraphConv/0921-2135/
activity_743398	nervous System	63.9	80.12	2.43	0.7956	built_models/moldata/GraphConv/0921-2135/
activity_2016	nervous System	77.71	31.55	0.85	0.5626	built_models/moldata/GraphConv/0921-2135/
activity_2025	nervous System	74.45	37.63	0.44	0.5913	built_models/moldata/GraphConv/0921-2135/
activity_2023	nervous System	71.89	72	1.02	0.7951	built_models/moldata/GraphConv/0921-2135/
activity_2066	nervous System	55.1	33.33	0.02	0.4077	built_models/moldata/GraphConv/0921-2135/
activity_2029	nervous System	66.47	58.33	0.14	0.6872	built_models/moldata/GraphConv/0921-2135/
activity_2097	nervous System	86.65	60	0.15	0.8386	built_models/moldata/GraphConv/0921-2135/
activity_1910	nervous System	35.06	84.87	0.52	0.727	built_models/moldata/GraphConv/0921-2135/
activity_2690	nervous System	74.41	53.33	0.29	0.6745	built_models/moldata/GraphConv/0921-2135/
activity_602332	nervous System	90.92	10	0.03	0.6207	built_models/moldata/GraphConv/0921-2135/
activity_1347071	nervous System	88.65	78.57	0.51	0.8788	built_models/moldata/GraphConv/0921-2135/
activity_485281	nervous System	86.57	57.5	0.59	0.8337	built_models/moldata/GraphConv/0921-2135/
activity_485349	nervous System	83.41	27.69	0.35	0.6698	built_models/moldata/GraphConv/0921-2135/
activity_1460	nervous System	91.97	75.95	26.22	0.9253	built_models/moldata/GraphConv/0921-2135/
activity_1471	nervous System	57.07	70.83	0.27	0.6723	built_models/moldata/GraphConv/0921-2135/
activity_1688	nervous System	72.1	55.69	2.51	0.6914	built_models/moldata/GraphConv/0921-2135/
activity_624168	nervous System	70.32	48.28	0.37	0.6636	built_models/moldata/GraphConv/0921-2135/
activity_588489	nervous System	72.1	69.23	1.22	0.7868	built_models/moldata/GraphConv/0921-2135/
activity_588621	nervous System	94.12	38.1	1.87	0.7719	built_models/moldata/GraphConv/0921-2135/
activity_493091	nervous System	75.89	70.24	3.43	0.8007	built_models/moldata/GraphConv/0921-2135/
activity_449763	nervous System	80.09	59.49	1.46	0.7729	built_models/moldata/GraphConv/0921-2135/
activity_463104	nervous System	88.68	56.38	2.3	0.8596	built_models/moldata/GraphConv/0921-2135/
activity_463190	nervous System	84.3	43.44	6.7	0.7694	built_models/moldata/GraphConv/0921-2135/
activity_463212	nervous System	78.05	71.66	4.3	0.8315	built_models/moldata/GraphConv/0921-2135/
activity_1468	nervous System	75.11	83.2	1.49	0.8432	built_models/moldata/GraphConv/0921-2135/
activity_588413	nervous System	66.83	62.36	1.91	0.7035	built_models/moldata/GraphConv/0921-2135/
activity_720596	nervous System	87.09	40.09	1.75	0.7486	built_models/moldata/GraphConv/0921-2135/
activity_651821	nervous System	80.22	88.74	5.75	0.9183	built_models/moldata/GraphConv/0921-2135/
activity_652039	nervous System	59.68	93.16	2.26	0.8664	built_models/moldata/GraphConv/0921-2135/
activity_624377	nervous System	61.85	74	0.51	0.7709	built_models/moldata/GraphConv/0921-2135/
activity_651718	nervous System	79	75.71	3.25	0.858	built_models/moldata/GraphConv/0921-2135/
activity_651572	nervous System	83.24	58.42	0.92	0.7686	built_models/moldata/GraphConv/0921-2135/
activity_602163	nervous System	46.14	62.1	0.38	0.5687	built_models/moldata/GraphConv/0921-2135/
activity_602123	nervous System	57.87	70.76	1.05	0.7164	built_models/moldata/GraphConv/0921-2135/
activity_540364	nervous System	87.7	32.44	1.68	0.713	built_models/moldata/GraphConv/0921-2135/
activity_504411	nervous System	89.84	83.87	0.74	0.9522	built_models/moldata/GraphConv/0921-2135/
activity_504803	nervous System	86.14	73.83	3.87	0.8885	built_models/moldata/GraphConv/0921-2135/
activity_493087	nervous System	53.37	80.77	0.13	0.7757	built_models/moldata/GraphConv/0921-2135/
activity_434962	nervous System	85.39	58.86	2.2	0.8168	built_models/moldata/GraphConv/0921-2135/
activity_1203	nervous System	80.4	54.55	0.12	0.7651	built_models/moldata/GraphConv/0921-2135/
activity_602410	nervous System	85.03	54.9	3.62	0.8081	built_models/moldata/GraphConv/0921-2135/
activity_623877	nervous System	54.45	60.32	0.51	0.6148	built_models/moldata/GraphConv/0921-2135/
activity_488975	nervous System	71.76	40.73	1.44	0.6111	built_models/moldata/GraphConv/0921-2135/
activity_488977	nervous System	79.94	56.44	2.07	0.7678	built_models/moldata/GraphConv/0921-2135/
activity_588627	nervous System	71.76	70.91	1.35	0.7787	built_models/moldata/GraphConv/0921-2135/
activity_588675	nervous System	87.26	22.94	1.03	0.6341	built_models/moldata/GraphConv/0921-2135/
activity_588676	nervous System	86.55	19.38	2.11	0.5453	built_models/moldata/GraphConv/0921-2135/
activity_1672	nervous System	78.42	75.53	2.69	0.8579	built_models/moldata/GraphConv/0921-2135/
activity_2648	nervous System	82.31	68.03	1.54	0.8352	built_models/moldata/GraphConv/0921-2135/
activity_463111	nervous System	79.31	57.68	3.39	0.7432	built_models/moldata/GraphConv/0921-2135/
activity_463165	nervous System	75.49	74.7	1.65	0.8244	built_models/moldata/GraphConv/0921-2135/
activity_2156	nervous System	77.45	65.92	3.81	0.7934	built_models/moldata/GraphConv/0921-2135/
activity_2227	nervous System	75.17	53.85	0.84	0.7151	built_models/moldata/GraphConv/0921-2135/
activity_2239	nervous System	61.76	73.22	1.15	0.7526	built_models/moldata/GraphConv/0921-2135/
activity_624037	nervous System	80.01	75.86	0.86	0.8406	built_models/moldata/GraphConv/0921-2135/
activity_624038	nervous System	78.35	23.44	0.37	0.5284	built_models/moldata/GraphConv/0921-2135/
activity_624040	nervous System	74.19	65.57	1.62	0.7694	built_models/moldata/GraphConv/0921-2135/
activity_624125	nervous System	75.14	63.01	2.59	0.7653	built_models/moldata/GraphConv/0921-2135/
activity_624126	nervous System	29.7	82.05	0.48	0.5805	built_models/moldata/GraphConv/0921-2135/
activity_624127	nervous System	77.2	58.73	0.43	0.7758	built_models/moldata/GraphConv/0921-2135/
activity_624466	nervous System	59.93	81.37	3.92	0.7762	built_models/moldata/GraphConv/0921-2135/
activity_624467	nervous System	76.07	65.91	3.14	0.7906	built_models/moldata/GraphConv/0921-2135/
activity_602247	nervous System	89.25	26.09	0.15	0.664	built_models/moldata/GraphConv/0921-2135/
activity_602248	nervous System	59.06	64.25	0.75	0.6569	built_models/moldata/GraphConv/0921-2135/
activity_602250	nervous System	61.25	50.97	0.91	0.5973	built_models/moldata/GraphConv/0921-2135/
activity_588814	nervous System	75.37	53.17	0.74	0.7159	built_models/moldata/GraphConv/0921-2135/
activity_588819	nervous System	51.48	42.42	0.08	0.4779	built_models/moldata/GraphConv/0921-2135/
activity_588852	nervous System	53.06	85.07	2.77	0.7827	built_models/moldata/GraphConv/0921-2135/
activity_504634	nervous System	57.97	58.33	0.15	0.6222	built_models/moldata/GraphConv/0921-2135/
activity_504692	nervous System	56.57	66.67	0.97	0.6618	built_models/moldata/GraphConv/0921-2135/
activity_504454	nervous System	92.01	35.96	2.76	0.7583	built_models/moldata/GraphConv/0921-2135/
activity_652048	nervous System	60.12	66.02	1.11	0.6645	built_models/moldata/GraphConv/0921-2135/
activity_652051	nervous System	59.75	63.71	1.07	0.6555	built_models/moldata/GraphConv/0921-2135/
activity_493056	nervous System	55.74	46.27	0.67	0.5212	built_models/moldata/GraphConv/0921-2135/
activity_493084	nervous System	84.31	84.71	1.45	0.9039	built_models/moldata/GraphConv/0921-2135/
activity_504660	nervous System	76.48	72.41	3.35	0.8161	built_models/moldata/GraphConv/0921-2135/
activity_652054	nervous System	80.83	60.55	10.07	0.7652	built_models/moldata/GraphConv/0921-2135/
activity_624463	nervous System	89.19	74.4	2.27	0.9037	built_models/moldata/GraphConv/0921-2135/
activity_504651	nervous System	55.21	50	0.03	0.5808	built_models/moldata/GraphConv/0921-2135/
activity_624465	nervous System	65.04	82.35	0.11	0.8074	built_models/moldata/GraphConv/0921-2135/
activity_504652	nervous System	84.95	26.38	5.78	0.5986	built_models/moldata/GraphConv/0921-2135/
activity_624464	nervous System	86.83	71.59	1.31	0.8564	built_models/moldata/GraphConv/0921-2135/
activity_485347	nervous System	97.72	0.88	0.18	0.5352	built_models/moldata/GraphConv/0921-2135/
activity_485344	nervous System	22.93	86.19	2.5	0.6635	built_models/moldata/GraphConv/0921-2135/
activity_485358	nervous System	89.27	57.82	3.85	0.8073	built_models/moldata/GraphConv/0921-2135/
activity_540275	nervous System	79.29	67.39	0.52	0.7959	built_models/moldata/GraphConv/0921-2135/
activity_540277	nervous System	83.67	16.67	0.02	0.6044	built_models/moldata/GraphConv/0921-2135/
activity_493036	nervous System	88.82	42.47	0.87	0.8024	built_models/moldata/GraphConv/0921-2135/
activity_743067	nervous System	70.22	41.3	16.96	0.6277	built_models/moldata/GraphConv/0921-2135/
activity_1159519	nervous System	60.49	75	5.13	0.7311	built_models/moldata/GraphConv/0921-2135/

## Sheet: immune system
AID	run_type	accuracy_score	recall_score	precision_score	roc_auc_score	model_dir
immune system	immune system	71.36	62.88	2.83	0.7533	built_models/moldata/GraphConv/0923-1718/
activity_2732	immune system	85.48	37.97	9.88	0.7514	built_models/moldata/GraphConv/0923-1718/
activity_1085	immune system	91.31	53.15	3.16	0.8095	built_models/moldata/GraphConv/0923-1718/
activity_1274	immune system	54.89	70.37	1.07	0.6635	built_models/moldata/GraphConv/0923-1718/
activity_781	immune system	83.31	50	1.93	0.7286	built_models/moldata/GraphConv/0923-1718/
activity_588358	immune system	33.74	86.1	0.78	0.6857	built_models/moldata/GraphConv/0923-1718/
activity_624417	immune system	83.07	61.43	7.67	0.8144	built_models/moldata/GraphConv/0923-1718/
activity_624418	immune system	89.93	55.91	1.43	0.826	built_models/moldata/GraphConv/0923-1718/
activity_652104	immune system	60.22	83.65	3.34	0.8027	built_models/moldata/GraphConv/0923-1718/
activity_504327	immune system	86.47	58.67	1.96	0.8003	built_models/moldata/GraphConv/0923-1718/
activity_624172	immune system	93.79	0	0	0.3234	built_models/moldata/GraphConv/0923-1718/
activity_2676	immune system	56.77	88.31	0.5	0.8356	built_models/moldata/GraphConv/0923-1718/
activity_652025	immune system	70.6	90.32	0.25	0.9116	built_models/moldata/GraphConv/0923-1718/
activity_743279	immune system	80.3	54.96	15.57	0.7733	built_models/moldata/GraphConv/0923-1718/
activity_651644	immune system	89.48	59.43	1.61	0.8731	built_models/moldata/GraphConv/0923-1718/
activity_2551	immune system	78.27	74.91	19.66	0.844	built_models/moldata/GraphConv/0923-1718/
activity_2546	immune system	78.49	68.78	12.47	0.8164	built_models/moldata/GraphConv/0923-1718/
activity_2315	immune system	69.49	77.02	19.15	0.8052	built_models/moldata/GraphConv/0923-1718/
activity_2675	immune system	62.6	66.67	0.13	0.6973	built_models/moldata/GraphConv/0923-1718/
activity_2326	immune system	40.59	85.47	0.95	0.7125	built_models/moldata/GraphConv/0923-1718/
activity_1259318	immune system	91.2	49.54	4.63	0.8428	built_models/moldata/GraphConv/0923-1718/
activity_651699	immune system	80.64	68.75	2.36	0.842	built_models/moldata/GraphConv/0923-1718/
activity_489030	immune system	44.15	91.15	1.7	0.8114	built_models/moldata/GraphConv/0923-1718/
activity_489031	immune system	24.96	73.81	0.26	0.4967	built_models/moldata/GraphConv/0923-1718/
activity_485273	immune system	63.55	77.3	1.08	0.7948	built_models/moldata/GraphConv/0923-1718/
activity_2071	immune system	44.41	65.56	0.75	0.5762	built_models/moldata/GraphConv/0923-1718/
activity_940	immune system	94.09	28.76	3.54	0.7965	built_models/moldata/GraphConv/0923-1718/
activity_1422	immune system	71.59	71.12	3.18	0.7839	built_models/moldata/GraphConv/0923-1718/
activity_588499	immune system	85.91	74.51	1.47	0.8866	built_models/moldata/GraphConv/0923-1718/
activity_504490	immune system	36.07	55.96	0.28	0.4413	built_models/moldata/GraphConv/0923-1718/
activity_2557	immune system	70.42	34.85	0.25	0.5318	built_models/moldata/GraphConv/0923-1718/
activity_624170	immune system	67.39	77.67	0.65	0.823	built_models/moldata/GraphConv/0923-1718/
activity_624171	immune system	74.07	81.25	1.22	0.8475	built_models/moldata/GraphConv/0923-1718/
activity_1347120	immune system	43.84	88.68	0.72	0.7981	built_models/moldata/GraphConv/0923-1718/
activity_504891	immune system	84.46	100	0.08	0.9753	built_models/moldata/GraphConv/0923-1718/
activity_720707	immune system	71.62	76.92	0.19	0.8577	built_models/moldata/GraphConv/0923-1718/
activity_720708	immune system	86.86	60.32	0.77	0.8339	built_models/moldata/GraphConv/0923-1718/
activity_720709	immune system	56.75	94.68	0.55	0.9013	built_models/moldata/GraphConv/0923-1718/
activity_720711	immune system	81.66	75	0.56	0.8873	built_models/moldata/GraphConv/0923-1718/
activity_1224865	immune system	81.68	59.75	1.36	0.7767	built_models/moldata/GraphConv/0923-1718/
activity_743269	immune system	53.79	78.96	1.55	0.7545	built_models/moldata/GraphConv/0923-1718/
activity_2642	immune system	68.38	81.08	3.66	0.815	built_models/moldata/GraphConv/0923-1718/
activity_624483	immune system	96.12	0	0	0.5729	built_models/moldata/GraphConv/0923-1718/
activity_651636	immune system	83.3	58.18	3	0.795	built_models/moldata/GraphConv/0923-1718/
activity_1656	immune system	67.57	66.67	0.8	0.7309	built_models/moldata/GraphConv/0923-1718/
activity_651958	immune system	20.64	96.47	0.78	0.7869	built_models/moldata/GraphConv/0923-1718/
activity_435030	immune system	80.7	68.6	1.33	0.8098	built_models/moldata/GraphConv/0923-1718/
activity_449728	immune system	63.11	85.48	0.89	0.8324	built_models/moldata/GraphConv/0923-1718/
activity_485272	immune system	65.08	84.38	1.2	0.8221	built_models/moldata/GraphConv/0923-1718/
activity_1950	immune system	75.99	54.2	0.97	0.6991	built_models/moldata/GraphConv/0923-1718/
activity_1789	immune system	82.86	54.11	3.09	0.7516	built_models/moldata/GraphConv/0923-1718/
activity_1304	immune system	79.32	53.93	0.85	0.7362	built_models/moldata/GraphConv/0923-1718/
activity_1446	immune system	57.17	75.08	1.92	0.7406	built_models/moldata/GraphConv/0923-1718/
activity_1481	immune system	39.26	90.78	0.76	0.7927	built_models/moldata/GraphConv/0923-1718/
activity_1486	immune system	30.02	85.58	1.41	0.6852	built_models/moldata/GraphConv/0923-1718/
activity_1040	immune system	85.52	41.89	3.5	0.7126	built_models/moldata/GraphConv/0923-1718/
activity_861	immune system	88.22	57.45	0.92	0.8067	built_models/moldata/GraphConv/0923-1718/
activity_743287	immune system	67.78	51.58	1.22	0.6536	built_models/moldata/GraphConv/0923-1718/
activity_651687	immune system	90.25	26.58	0.75	0.6983	built_models/moldata/GraphConv/0923-1718/
activity_651723	immune system	85.62	37.08	0.79	0.6721	built_models/moldata/GraphConv/0923-1718/
activity_652197	immune system	85.13	64.62	1.11	0.8167	built_models/moldata/GraphConv/0923-1718/
activity_504523	immune system	46.98	77.05	0.26	0.7361	built_models/moldata/GraphConv/0923-1718/
activity_488839	immune system	98.82	33.33	0.25	0.9214	built_models/moldata/GraphConv/0923-1718/
activity_435005	immune system	75.89	71.91	3.19	0.8057	built_models/moldata/GraphConv/0923-1718/
activity_651702	immune system	67.99	73.05	1.83	0.7813	built_models/moldata/GraphConv/0923-1718/
activity_588497	immune system	99.34	1.25	0.62	0.6065	built_models/moldata/GraphConv/0923-1718/
activity_588501	immune system	92.57	52.78	1.39	0.8015	built_models/moldata/GraphConv/0923-1718/
activity_485275	immune system	71.91	43.53	0.82	0.6074	built_models/moldata/GraphConv/0923-1718/
activity_602332	immune system	89.08	10	0.02	0.5897	built_models/moldata/GraphConv/0923-1718/
activity_504937	immune system	96.24	0	0	0.7834	built_models/moldata/GraphConv/0923-1718/
activity_2685	immune system	12.18	93.42	1.08	0.5803	built_models/moldata/GraphConv/0923-1718/
activity_2314	immune system	72.11	72.42	26.33	0.7941	built_models/moldata/GraphConv/0923-1718/
activity_1452	immune system	80.17	68.42	0.32	0.8197	built_models/moldata/GraphConv/0923-1718/
activity_881	immune system	91.07	71.76	4.23	0.8816	built_models/moldata/GraphConv/0923-1718/
activity_651560	immune system	89.4	63.03	2.56	0.8539	built_models/moldata/GraphConv/0923-1718/
activity_602274	immune system	19.8	85.19	0.08	0.525	built_models/moldata/GraphConv/0923-1718/
activity_588621	immune system	95.74	35.24	2.41	0.7925	built_models/moldata/GraphConv/0923-1718/
activity_588850	immune system	72.96	73.45	3.82	0.8089	built_models/moldata/GraphConv/0923-1718/
activity_602141	immune system	89.92	51.08	3.17	0.8321	built_models/moldata/GraphConv/0923-1718/
activity_493160	immune system	90.69	63.27	1.94	0.8614	built_models/moldata/GraphConv/0923-1718/
activity_449763	immune system	80.2	61.39	1.52	0.7723	built_models/moldata/GraphConv/0923-1718/
activity_463104	immune system	83.1	65.77	1.79	0.8455	built_models/moldata/GraphConv/0923-1718/
activity_435022	immune system	87.49	26.52	0.88	0.661	built_models/moldata/GraphConv/0923-1718/
activity_2380	immune system	23.45	87.34	0.28	0.5776	built_models/moldata/GraphConv/0923-1718/
activity_2825	immune system	72.6	73.02	1.05	0.802	built_models/moldata/GraphConv/0923-1718/
activity_435003	immune system	85.68	52.13	2.41	0.7584	built_models/moldata/GraphConv/0923-1718/
activity_651582	immune system	80.35	60.16	3.04	0.781	built_models/moldata/GraphConv/0923-1718/
activity_1347034	immune system	63.79	74.67	20.29	0.7377	built_models/moldata/GraphConv/0923-1718/
activity_1347037	immune system	60.12	71.43	8.83	0.7051	built_models/moldata/GraphConv/0923-1718/
activity_1490	immune system	66.28	76.12	10.17	0.7771	built_models/moldata/GraphConv/0923-1718/
activity_652257	immune system	65.81	83.5	4.62	0.8252	built_models/moldata/GraphConv/0923-1718/
activity_743126	immune system	80.56	65.05	1.72	0.7969	built_models/moldata/GraphConv/0923-1718/
activity_1053197	immune system	82.49	57.55	2.61	0.7576	built_models/moldata/GraphConv/0923-1718/
activity_624267	immune system	84.87	68.08	2.49	0.8203	built_models/moldata/GraphConv/0923-1718/
activity_651800	immune system	68.33	66.87	0.9	0.7595	built_models/moldata/GraphConv/0923-1718/
activity_504734	immune system	78.13	80.85	1	0.88	built_models/moldata/GraphConv/0923-1718/
activity_493087	immune system	45.55	80.77	0.12	0.7198	built_models/moldata/GraphConv/0923-1718/
activity_434962	immune system	81.74	62.29	1.86	0.812	built_models/moldata/GraphConv/0923-1718/
activity_1906	immune system	73.31	48.94	1.14	0.6553	built_models/moldata/GraphConv/0923-1718/
activity_1822	immune system	54.36	87.56	2.44	0.8087	built_models/moldata/GraphConv/0923-1718/
activity_631	immune system	57.85	82.83	0.78	0.781	built_models/moldata/GraphConv/0923-1718/
activity_731	immune system	88.54	50	1.16	0.812	built_models/moldata/GraphConv/0923-1718/
activity_1032	immune system	71.56	74.7	0.87	0.7872	built_models/moldata/GraphConv/0923-1718/
activity_1203	immune system	80.85	63.64	0.15	0.7868	built_models/moldata/GraphConv/0923-1718/
activity_920	immune system	74.31	67.92	1.12	0.8008	built_models/moldata/GraphConv/0923-1718/
activity_932	immune system	86.18	60.63	9.18	0.8392	built_models/moldata/GraphConv/0923-1718/
activity_862	immune system	94.16	35.34	6.91	0.7929	built_models/moldata/GraphConv/0923-1718/
activity_871	immune system	54.37	89.43	1.78	0.8206	built_models/moldata/GraphConv/0923-1718/
activity_2052	immune system	22.14	70	0.06	0.4892	built_models/moldata/GraphConv/0923-1718/
activity_1529	immune system	48.85	61.09	1.92	0.5725	built_models/moldata/GraphConv/0923-1718/
activity_1530	immune system	98.11	21.05	4.88	0.8128	built_models/moldata/GraphConv/0923-1718/
activity_1531	immune system	66.69	66.89	2.94	0.716	built_models/moldata/GraphConv/0923-1718/
activity_602410	immune system	77.2	69.73	2.99	0.8098	built_models/moldata/GraphConv/0923-1718/
activity_588511	immune system	60.88	64.39	2.27	0.6797	built_models/moldata/GraphConv/0923-1718/
activity_2648	immune system	87.91	68.03	2.24	0.8637	built_models/moldata/GraphConv/0923-1718/
activity_463111	immune system	78.83	58.49	3.35	0.7416	built_models/moldata/GraphConv/0923-1718/
activity_463165	immune system	74.89	73.49	1.59	0.8386	built_models/moldata/GraphConv/0923-1718/
activity_504660	immune system	73.46	71.84	2.95	0.7929	built_models/moldata/GraphConv/0923-1718/
activity_504651	immune system	56.01	62.5	0.04	0.5683	built_models/moldata/GraphConv/0923-1718/
activity_504652	immune system	82.73	28.23	5.28	0.6048	built_models/moldata/GraphConv/0923-1718/
activity_485347	immune system	98.33	3.54	1.04	0.5649	built_models/moldata/GraphConv/0923-1718/
activity_485344	immune system	23.46	86.94	2.53	0.653	built_models/moldata/GraphConv/0923-1718/
activity_485358	immune system	90.2	56.87	4.15	0.8105	built_models/moldata/GraphConv/0923-1718/
activity_504810	immune system	78.54	39.39	0.38	0.6793	built_models/moldata/GraphConv/0923-1718/
activity_504812	immune system	78.44	43.94	0.42	0.693	built_models/moldata/GraphConv/0923-1718/
activity_540275	immune system	73.19	56.52	0.33	0.7354	built_models/moldata/GraphConv/0923-1718/
activity_540277	immune system	79.11	33.33	0.03	0.694	built_models/moldata/GraphConv/0923-1718/
activity_1159519	immune system	62.76	62.5	4.61	0.7164	built_models/moldata/GraphConv/0923-1718/
activity_743239	immune system	50.24	82.61	5.88	0.7083	built_models/moldata/GraphConv/0923-1718/
activity_743240	immune system	54.21	73.68	11.62	0.7085	built_models/moldata/GraphConv/0923-1718/

## Sheet: cardiovascular
AID	run_type	accuracy_score	recall_score	precision_score	roc_auc_score	model_dir
cardiovascular	cardiovascular	67.89	63.69	2.22	0.7308	built_models/moldata/GraphConv/0923-1718/
activity_1236	cardiovascular	83.08	45.05	1.07	0.7013	built_models/moldata/GraphConv/0923-1718/
activity_1274	cardiovascular	37.82	78.84	0.87	0.6278	built_models/moldata/GraphConv/0923-1718/
activity_504847	cardiovascular	85.9	56.51	6.09	0.7884	built_models/moldata/GraphConv/0923-1718/
activity_504327	cardiovascular	87.71	55.33	2.03	0.7991	built_models/moldata/GraphConv/0923-1718/
activity_2676	cardiovascular	47.1	96.1	0.45	0.8492	built_models/moldata/GraphConv/0923-1718/
activity_1259400	cardiovascular	64.43	80.85	1.72	0.8177	built_models/moldata/GraphConv/0923-1718/
activity_2315	cardiovascular	70.08	77.17	19.5	0.8074	built_models/moldata/GraphConv/0923-1718/
activity_2675	cardiovascular	62.09	50	0.09	0.6537	built_models/moldata/GraphConv/0923-1718/
activity_1259318	cardiovascular	83.98	66.26	3.34	0.8384	built_models/moldata/GraphConv/0923-1718/
activity_624352	cardiovascular	60.96	79.15	2.22	0.7762	built_models/moldata/GraphConv/0923-1718/
activity_485	cardiovascular	31.37	71.43	0.36	0.488	built_models/moldata/GraphConv/0923-1718/
activity_602162	cardiovascular	96.76	7.59	0.52	0.5703	built_models/moldata/GraphConv/0923-1718/
activity_488847	cardiovascular	74.44	39.41	0.98	0.5751	built_models/moldata/GraphConv/0923-1718/
activity_624171	cardiovascular	70.49	79.86	1.05	0.8409	built_models/moldata/GraphConv/0923-1718/
activity_720707	cardiovascular	59.96	92.31	0.16	0.8822	built_models/moldata/GraphConv/0923-1718/
activity_720708	cardiovascular	84.1	61.9	0.65	0.8402	built_models/moldata/GraphConv/0923-1718/
activity_720709	cardiovascular	67.89	93.62	0.74	0.9014	built_models/moldata/GraphConv/0923-1718/
activity_720711	cardiovascular	79.84	82.69	0.56	0.8733	built_models/moldata/GraphConv/0923-1718/
activity_1012	cardiovascular	86.25	62.12	1.2	0.8304	built_models/moldata/GraphConv/0923-1718/
activity_2642	cardiovascular	65.88	83.78	3.5	0.8241	built_models/moldata/GraphConv/0923-1718/
activity_2237	cardiovascular	88.11	49.74	2.61	0.7985	built_models/moldata/GraphConv/0923-1718/
activity_2247	cardiovascular	47.42	78.07	0.56	0.6738	built_models/moldata/GraphConv/0923-1718/
activity_624483	cardiovascular	96.04	0.28	8.51	0.5737	built_models/moldata/GraphConv/0923-1718/
activity_1415	cardiovascular	29.12	82.65	0.41	0.5616	built_models/moldata/GraphConv/0923-1718/
activity_1423	cardiovascular	25.93	77.98	0.42	0.5643	built_models/moldata/GraphConv/0923-1718/
activity_1439	cardiovascular	33.85	68.32	0.44	0.5192	built_models/moldata/GraphConv/0923-1718/
activity_1441	cardiovascular	29.71	72.57	0.42	0.53	built_models/moldata/GraphConv/0923-1718/
activity_602438	cardiovascular	77.58	33.61	1.43	0.562	built_models/moldata/GraphConv/0923-1718/
activity_2521	cardiovascular	79.83	55.56	1.01	0.7215	built_models/moldata/GraphConv/0923-1718/
activity_2520	cardiovascular	78.89	47.92	0.34	0.7117	built_models/moldata/GraphConv/0923-1718/
activity_1656	cardiovascular	71.89	66.67	0.92	0.7291	built_models/moldata/GraphConv/0923-1718/
activity_686940	cardiovascular	80.94	51.24	2.99	0.722	built_models/moldata/GraphConv/0923-1718/
activity_720508	cardiovascular	47.73	69.12	0.23	0.6367	built_models/moldata/GraphConv/0923-1718/
activity_720509	cardiovascular	44.83	69.44	0.34	0.6261	built_models/moldata/GraphConv/0923-1718/
activity_720700	cardiovascular	53.9	53.87	1.02	0.5572	built_models/moldata/GraphConv/0923-1718/
activity_720704	cardiovascular	60.57	55.29	0.3	0.605	built_models/moldata/GraphConv/0923-1718/
activity_1359	cardiovascular	78.87	47.41	0.95	0.7162	built_models/moldata/GraphConv/0923-1718/
activity_793	cardiovascular	51.44	84.92	1.86	0.7646	built_models/moldata/GraphConv/0923-1718/
activity_623870	cardiovascular	75.23	75.92	3.18	0.8402	built_models/moldata/GraphConv/0923-1718/
activity_651711	cardiovascular	56.29	66.67	0.05	0.6827	built_models/moldata/GraphConv/0923-1718/
activity_651687	cardiovascular	83.6	35.44	0.59	0.6319	built_models/moldata/GraphConv/0923-1718/
activity_651723	cardiovascular	85.39	38.2	0.8	0.6873	built_models/moldata/GraphConv/0923-1718/
activity_588391	cardiovascular	52.72	84.85	0.17	0.7948	built_models/moldata/GraphConv/0923-1718/
activity_488896	cardiovascular	86.25	65.23	4.39	0.8565	built_models/moldata/GraphConv/0923-1718/
activity_504775	cardiovascular	71.74	24.32	0.1	0.5353	built_models/moldata/GraphConv/0923-1718/
activity_1910	cardiovascular	58.21	63.87	0.61	0.6935	built_models/moldata/GraphConv/0923-1718/
activity_588497	cardiovascular	99.14	3.75	1.28	0.6579	built_models/moldata/GraphConv/0923-1718/
activity_588501	cardiovascular	84.91	58.33	0.75	0.7739	built_models/moldata/GraphConv/0923-1718/
activity_2690	cardiovascular	70.19	53.33	0.25	0.6797	built_models/moldata/GraphConv/0923-1718/
activity_602332	cardiovascular	89.02	10	0.02	0.6048	built_models/moldata/GraphConv/0923-1718/
activity_1347131	cardiovascular	64.73	78.48	1.88	0.7785	built_models/moldata/GraphConv/0923-1718/
activity_1159524	cardiovascular	64.45	74.58	4.13	0.7684	built_models/moldata/GraphConv/0923-1718/
activity_504937	cardiovascular	93.93	0	0	0.8451	built_models/moldata/GraphConv/0923-1718/
activity_2100	cardiovascular	74.26	68.37	0.9	0.8015	built_models/moldata/GraphConv/0923-1718/
activity_2314	cardiovascular	70.84	73.61	25.56	0.7909	built_models/moldata/GraphConv/0923-1718/
activity_2242	cardiovascular	80.73	89.74	1.55	0.9131	built_models/moldata/GraphConv/0923-1718/
activity_651560	cardiovascular	84.83	69.09	1.96	0.8549	built_models/moldata/GraphConv/0923-1718/
activity_588492	cardiovascular	62.84	84.89	1.9	0.8195	built_models/moldata/GraphConv/0923-1718/
activity_652257	cardiovascular	69.24	83.38	5.11	0.8366	built_models/moldata/GraphConv/0923-1718/
activity_602281	cardiovascular	59.99	90.19	2.77	0.8466	built_models/moldata/GraphConv/0923-1718/
activity_651718	cardiovascular	79.33	73.71	3.21	0.8515	built_models/moldata/GraphConv/0923-1718/
activity_602163	cardiovascular	35.7	73.39	0.38	0.5945	built_models/moldata/GraphConv/0923-1718/
activity_602123	cardiovascular	59.52	69.49	1.07	0.7157	built_models/moldata/GraphConv/0923-1718/
activity_492953	cardiovascular	69.9	84.16	3.44	0.8411	built_models/moldata/GraphConv/0923-1718/
activity_492956	cardiovascular	66.98	79.67	2.17	0.8228	built_models/moldata/GraphConv/0923-1718/
activity_492972	cardiovascular	78.48	84.51	1.65	0.9105	built_models/moldata/GraphConv/0923-1718/
activity_493008	cardiovascular	78.48	81.9	1.31	0.8942	built_models/moldata/GraphConv/0923-1718/
activity_493244	cardiovascular	56.4	59.57	0.19	0.6338	built_models/moldata/GraphConv/0923-1718/
activity_463082	cardiovascular	68.45	77.6	4.29	0.8043	built_models/moldata/GraphConv/0923-1718/
activity_1906	cardiovascular	64.7	58.51	1.02	0.66	built_models/moldata/GraphConv/0923-1718/
activity_1822	cardiovascular	52.81	87.31	2.36	0.8036	built_models/moldata/GraphConv/0923-1718/
activity_631	cardiovascular	47.46	83.84	0.63	0.7542	built_models/moldata/GraphConv/0923-1718/
activity_731	cardiovascular	84.9	54.55	0.96	0.8208	built_models/moldata/GraphConv/0923-1718/
activity_1529	cardiovascular	55.96	54.6	2	0.573	built_models/moldata/GraphConv/0923-1718/
activity_1530	cardiovascular	96.76	27.19	3.43	0.821	built_models/moldata/GraphConv/0923-1718/
activity_1531	cardiovascular	65.8	63.47	2.73	0.71	built_models/moldata/GraphConv/0923-1718/
activity_602410	cardiovascular	70.37	72.11	2.38	0.7905	built_models/moldata/GraphConv/0923-1718/
activity_623877	cardiovascular	54.77	57.94	0.49	0.5943	built_models/moldata/GraphConv/0923-1718/
activity_588511	cardiovascular	55.82	69.81	2.17	0.6736	built_models/moldata/GraphConv/0923-1718/
activity_1511	cardiovascular	61.18	60.67	0.92	0.6516	built_models/moldata/GraphConv/0923-1718/
activity_2550	cardiovascular	89.41	35.71	0.63	0.7393	built_models/moldata/GraphConv/0923-1718/
activity_2553	cardiovascular	74.29	66.94	3.07	0.7579	built_models/moldata/GraphConv/0923-1718/
activity_2648	cardiovascular	85.75	73.77	2.06	0.8625	built_models/moldata/GraphConv/0923-1718/
activity_463111	cardiovascular	71.53	64.15	2.73	0.7516	built_models/moldata/GraphConv/0923-1718/
activity_463165	cardiovascular	72.23	79.52	1.55	0.8325	built_models/moldata/GraphConv/0923-1718/
activity_2156	cardiovascular	73.49	66.67	3.28	0.7736	built_models/moldata/GraphConv/0923-1718/
activity_2227	cardiovascular	78.37	54.7	0.98	0.7123	built_models/moldata/GraphConv/0923-1718/
activity_2239	cardiovascular	72.42	66.12	1.44	0.7578	built_models/moldata/GraphConv/0923-1718/
activity_624291	cardiovascular	75.31	23.08	0.04	0.4756	built_models/moldata/GraphConv/0923-1718/
activity_1469	cardiovascular	71.47	86.96	0.23	0.9119	built_models/moldata/GraphConv/0923-1718/
activity_1479	cardiovascular	26.62	93.44	0.26	0.7262	built_models/moldata/GraphConv/0923-1718/
activity_743067	cardiovascular	64.27	56.52	17.33	0.6455	built_models/moldata/GraphConv/0923-1718/
activity_1159531	cardiovascular	60.96	41.18	4.4	0.5497	built_models/moldata/GraphConv/0923-1718/
activity_1159519	cardiovascular	46.33	87.5	4.39	0.7236	built_models/moldata/GraphConv/0923-1718/

## Sheet: toxicity
AID	run_type	accuracy_score	recall_score	precision_score	roc_auc_score	model_dir
toxicity	toxicity	59.88	74.73	14.76	0.7324	built_models/moldata/GraphConv/0923-1718/
activity_652104	toxicity	61.44	81.24	3.35	0.7862	built_models/moldata/GraphConv/0923-1718/
activity_1259388	toxicity	64.11	71.88	8.78	0.7696	built_models/moldata/GraphConv/0923-1718/
activity_588499	toxicity	84.25	73.53	1.3	0.8734	built_models/moldata/GraphConv/0923-1718/
activity_624170	toxicity	73.37	75.73	0.78	0.8413	built_models/moldata/GraphConv/0923-1718/
activity_1347076	toxicity	85.42	28.22	12.28	0.7098	built_models/moldata/GraphConv/0923-1718/
activity_1347075	toxicity	65.85	71.59	4.19	0.7532	built_models/moldata/GraphConv/0923-1718/
activity_602340	toxicity	95.56	3.74	1.29	0.528	built_models/moldata/GraphConv/0923-1718/
activity_720637	toxicity	66.05	78.63	39.66	0.8093	built_models/moldata/GraphConv/0923-1718/
activity_720552	toxicity	70.17	51.39	20.44	0.6775	built_models/moldata/GraphConv/0923-1718/
activity_720719	toxicity	65.76	69.57	7.62	0.7488	built_models/moldata/GraphConv/0923-1718/
activity_720725	toxicity	50.95	82.61	14.45	0.7269	built_models/moldata/GraphConv/0923-1718/
activity_743053	toxicity	65.04	82.76	10.57	0.793	built_models/moldata/GraphConv/0923-1718/
activity_743054	toxicity	44.91	85.19	14.15	0.663	built_models/moldata/GraphConv/0923-1718/
activity_743063	toxicity	55.42	79.45	21.56	0.7019	built_models/moldata/GraphConv/0923-1718/
activity_743067	toxicity	65.76	67.39	20.13	0.6928	built_models/moldata/GraphConv/0923-1718/
activity_743077	toxicity	51.97	87.8	10.71	0.8091	built_models/moldata/GraphConv/0923-1718/
activity_743078	toxicity	64.54	68	17.35	0.7137	built_models/moldata/GraphConv/0923-1718/
activity_743091	toxicity	42.45	86.21	14.41	0.7356	built_models/moldata/GraphConv/0923-1718/
activity_743122	toxicity	75.17	77.55	37.44	0.8479	built_models/moldata/GraphConv/0923-1718/
activity_743139	toxicity	53.83	86.96	15.94	0.7667	built_models/moldata/GraphConv/0923-1718/
activity_743140	toxicity	51.01	94.29	11.04	0.8363	built_models/moldata/GraphConv/0923-1718/
activity_1159523	toxicity	40.28	94.79	26.45	0.743	built_models/moldata/GraphConv/0923-1718/
activity_1159528	toxicity	56.76	78.41	22.33	0.7273	built_models/moldata/GraphConv/0923-1718/
activity_1159531	toxicity	38.07	76.47	4.89	0.5891	built_models/moldata/GraphConv/0923-1718/
activity_1159555	toxicity	53.38	76.85	29.75	0.652	built_models/moldata/GraphConv/0923-1718/
activity_1224892	toxicity	36.03	94.87	22.16	0.6534	built_models/moldata/GraphConv/0923-1718/
activity_1224893	toxicity	45.36	68.42	5.78	0.6043	built_models/moldata/GraphConv/0923-1718/
activity_1224894	toxicity	67.5	83.33	2.51	0.7834	built_models/moldata/GraphConv/0923-1718/
activity_1224896	toxicity	56.05	61.82	11.76	0.6199	built_models/moldata/GraphConv/0923-1718/
activity_1259247	toxicity	56.89	84.43	33.99	0.7318	built_models/moldata/GraphConv/0923-1718/
activity_1259248	toxicity	54.24	86.36	24.36	0.7526	built_models/moldata/GraphConv/0923-1718/
activity_1259387	toxicity	56.68	78.57	7.14	0.7214	built_models/moldata/GraphConv/0923-1718/
activity_1259390	toxicity	61.38	57.14	1.59	0.663	built_models/moldata/GraphConv/0923-1718/
activity_1259391	toxicity	68.03	100	4.78	0.9655	built_models/moldata/GraphConv/0923-1718/
activity_1259392	toxicity	52.77	87.26	41.52	0.7008	built_models/moldata/GraphConv/0923-1718/
activity_1259394	toxicity	54.96	85.71	3.93	0.8656	built_models/moldata/GraphConv/0923-1718/
activity_1259396	toxicity	51.74	86.52	25.58	0.7327	built_models/moldata/GraphConv/0923-1718/
activity_1347030	toxicity	54.82	61.54	2.56	0.6262	built_models/moldata/GraphConv/0923-1718/
activity_1347031	toxicity	56.67	92.91	35.44	0.7805	built_models/moldata/GraphConv/0923-1718/
activity_1347032	toxicity	56.1	70.59	20.91	0.6741	built_models/moldata/GraphConv/0923-1718/
activity_1347033	toxicity	66.43	90.36	60.53	0.7665	built_models/moldata/GraphConv/0923-1718/
activity_1347036	toxicity	69.87	88.24	6.82	0.8887	built_models/moldata/GraphConv/0923-1718/
activity_1347038	toxicity	57.65	75	3.09	0.7269	built_models/moldata/GraphConv/0923-1718/
activity_1159518	toxicity	89.47	50	6.06	0.7267	built_models/moldata/GraphConv/0923-1718/
activity_1159519	toxicity	49.65	81.25	4.36	0.7172	built_models/moldata/GraphConv/0923-1718/
activity_743199	toxicity	72.32	69.39	21.79	0.7873	built_models/moldata/GraphConv/0923-1718/
activity_743219	toxicity	53.21	87.02	36.08	0.7288	built_models/moldata/GraphConv/0923-1718/
activity_743226	toxicity	78.15	46.15	5.45	0.7669	built_models/moldata/GraphConv/0923-1718/
activity_743227	toxicity	74.59	78.57	7.48	0.8408	built_models/moldata/GraphConv/0923-1718/
activity_743228	toxicity	30.74	83.64	10.5	0.5809	built_models/moldata/GraphConv/0923-1718/
activity_743239	toxicity	40.55	82.61	4.96	0.6166	built_models/moldata/GraphConv/0923-1718/
activity_743240	toxicity	48.25	81.58	11.23	0.698	built_models/moldata/GraphConv/0923-1718/
activity_743241	toxicity	83.36	33.33	1.09	0.6912	built_models/moldata/GraphConv/0923-1718/
activity_743242	toxicity	48.34	58.33	2.63	0.645	built_models/moldata/GraphConv/0923-1718/

## Sheet: obesity
AID	run_type	accuracy_score	recall_score	precision_score	roc_auc_score	model_dir
obesity	obesity	72.03	61.75	3.72	0.7407	built_models/moldata/GraphConv/0924-0333/
activity_2732	obesity	84.84	36.23	9.09	0.7391	built_models/moldata/GraphConv/0924-0333/
activity_624417	obesity	77.02	68.91	6.3	0.81	built_models/moldata/GraphConv/0924-0333/
activity_624418	obesity	84.62	60.22	1.01	0.7873	built_models/moldata/GraphConv/0924-0333/
activity_504327	obesity	87.25	51.33	1.83	0.7929	built_models/moldata/GraphConv/0924-0333/
activity_624172	obesity	91.4	0	0	0.3221	built_models/moldata/GraphConv/0924-0333/
activity_1259318	obesity	86.9	58.05	3.61	0.8358	built_models/moldata/GraphConv/0924-0333/
activity_624171	obesity	72.73	83.33	1.19	0.8426	built_models/moldata/GraphConv/0924-0333/
activity_720707	obesity	71.56	76.92	0.18	0.8205	built_models/moldata/GraphConv/0924-0333/
activity_720708	obesity	82.37	57.14	0.55	0.81	built_models/moldata/GraphConv/0924-0333/
activity_720709	obesity	51.13	96.81	0.5	0.9045	built_models/moldata/GraphConv/0924-0333/
activity_720711	obesity	79.54	80.77	0.54	0.8642	built_models/moldata/GraphConv/0924-0333/
activity_1224865	obesity	80.56	55.35	1.19	0.7571	built_models/moldata/GraphConv/0924-0333/
activity_493187	obesity	75.2	75.61	0.37	0.8152	built_models/moldata/GraphConv/0924-0333/
activity_2642	obesity	69.67	79.73	3.75	0.8187	built_models/moldata/GraphConv/0924-0333/
activity_1656	obesity	56.37	80.46	0.72	0.6991	built_models/moldata/GraphConv/0924-0333/
activity_720543	obesity	84.15	72.08	2.97	0.8549	built_models/moldata/GraphConv/0924-0333/
activity_1304	obesity	82.99	56.18	1.07	0.7774	built_models/moldata/GraphConv/0924-0333/
activity_1359	obesity	77.9	59.48	1.13	0.7385	built_models/moldata/GraphConv/0924-0333/
activity_1040	obesity	81.15	44.26	2.82	0.7109	built_models/moldata/GraphConv/0924-0333/
activity_743287	obesity	59.85	57.92	1.1	0.6336	built_models/moldata/GraphConv/0924-0333/
activity_651687	obesity	84.86	27.85	0.5	0.601	built_models/moldata/GraphConv/0924-0333/
activity_651723	obesity	81.83	34.83	0.59	0.6645	built_models/moldata/GraphConv/0924-0333/
activity_602340	obesity	97.13	0.62	0.42	0.5161	built_models/moldata/GraphConv/0924-0333/
activity_488896	obesity	90.41	54.3	5.3	0.8466	built_models/moldata/GraphConv/0924-0333/
activity_504775	obesity	67.69	29.73	0.11	0.5337	built_models/moldata/GraphConv/0924-0333/
activity_435005	obesity	73.55	68.52	2.78	0.7822	built_models/moldata/GraphConv/0924-0333/
activity_602332	obesity	91.13	10	0.03	0.6022	built_models/moldata/GraphConv/0924-0333/
activity_2107	obesity	96.68	0	0	0.5166	built_models/moldata/GraphConv/0924-0333/
activity_1030	obesity	69.65	50.43	19.57	0.6763	built_models/moldata/GraphConv/0924-0333/
activity_651560	obesity	88.67	62.42	2.37	0.8602	built_models/moldata/GraphConv/0924-0333/
activity_588621	obesity	93	43.81	1.79	0.7973	built_models/moldata/GraphConv/0924-0333/
activity_493160	obesity	90.95	65.31	2.05	0.8559	built_models/moldata/GraphConv/0924-0333/
activity_449763	obesity	77.43	56.33	1.22	0.7422	built_models/moldata/GraphConv/0924-0333/
activity_463104	obesity	87.04	59.73	2.12	0.8371	built_models/moldata/GraphConv/0924-0333/
activity_2380	obesity	14.73	92.41	0.27	0.5898	built_models/moldata/GraphConv/0924-0333/
activity_651582	obesity	71.22	69.32	2.38	0.7566	built_models/moldata/GraphConv/0924-0333/
activity_1490	obesity	70.31	73.56	11.14	0.7782	built_models/moldata/GraphConv/0924-0333/
activity_602281	obesity	51.98	87.68	2.26	0.8007	built_models/moldata/GraphConv/0924-0333/
activity_651800	obesity	77.89	65.03	1.25	0.7753	built_models/moldata/GraphConv/0924-0333/
activity_493087	obesity	36.48	84.62	0.1	0.692	built_models/moldata/GraphConv/0924-0333/
activity_434962	obesity	80.3	60	1.67	0.7957	built_models/moldata/GraphConv/0924-0333/
activity_631	obesity	60.63	79.8	0.8	0.7614	built_models/moldata/GraphConv/0924-0333/
activity_731	obesity	86.32	59.09	1.15	0.8287	built_models/moldata/GraphConv/0924-0333/
activity_2648	obesity	85.7	71.31	1.99	0.8642	built_models/moldata/GraphConv/0924-0333/
activity_1469	obesity	58.28	91.3	0.17	0.8685	built_models/moldata/GraphConv/0924-0333/
activity_1479	obesity	24.17	88.52	0.24	0.7373	built_models/moldata/GraphConv/0924-0333/
activity_1259401	obesity	48.97	69.12	18.8	0.619	built_models/moldata/GraphConv/0924-0333/
activity_1259402	obesity	60.99	78.38	13.3	0.7776	built_models/moldata/GraphConv/0924-0333/
activity_1259403	obesity	50.64	78.99	31.13	0.6499	built_models/moldata/GraphConv/0924-0333/
activity_1259404	obesity	53.79	86.96	10.31	0.8419	built_models/moldata/GraphConv/0924-0333/
activity_1159519	obesity	58.22	81.25	5.22	0.6894	built_models/moldata/GraphConv/0924-0333/
activity_743239	obesity	49.76	56.52	4.14	0.5708	built_models/moldata/GraphConv/0924-0333/
activity_743240	obesity	49.9	84.21	11.85	0.694	built_models/moldata/GraphConv/0924-0333/

## Sheet: virus
AID	run_type	accuracy_score	recall_score	precision_score	roc_auc_score	model_dir
virus	virus	73.99	59.9	2.57	0.7448	built_models/moldata/GraphConv/0924-0334/
activity_1085	virus	90.14	57.34	2.99	0.8241	built_models/moldata/GraphConv/0924-0334/
activity_602310	virus	85.19	66.67	0.55	0.8657	built_models/moldata/GraphConv/0924-0334/
activity_602313	virus	80.75	83.64	1.42	0.8972	built_models/moldata/GraphConv/0924-0334/
activity_651644	virus	85.7	71.7	1.43	0.8747	built_models/moldata/GraphConv/0924-0334/
activity_485353	virus	77.64	59.09	0.55	0.7278	built_models/moldata/GraphConv/0924-0334/
activity_540276	virus	82.51	57.43	9.17	0.792	built_models/moldata/GraphConv/0924-0334/
activity_540256	virus	71.8	66.2	5.15	0.7646	built_models/moldata/GraphConv/0924-0334/
activity_2326	virus	43.81	74.86	0.88	0.6584	built_models/moldata/GraphConv/0924-0334/
activity_743269	virus	46.73	83.06	1.42	0.7562	built_models/moldata/GraphConv/0924-0334/
activity_624483	virus	95.97	0.64	11.11	0.5813	built_models/moldata/GraphConv/0924-0334/
activity_651636	virus	81.12	63.33	2.88	0.8028	built_models/moldata/GraphConv/0924-0334/
activity_651958	virus	20.06	95.29	0.76	0.7851	built_models/moldata/GraphConv/0924-0334/
activity_1899	virus	74.13	73.5	2.16	0.8037	built_models/moldata/GraphConv/0924-0334/
activity_1950	virus	73.21	61.83	0.99	0.7249	built_models/moldata/GraphConv/0924-0334/
activity_1706	virus	53.81	88.89	0.23	0.7806	built_models/moldata/GraphConv/0924-0334/
activity_1789	virus	81.5	50.34	2.68	0.7287	built_models/moldata/GraphConv/0924-0334/
activity_1800	virus	60.96	82.94	1.49	0.7989	built_models/moldata/GraphConv/0924-0334/
activity_1509	virus	63.17	50.59	0.43	0.5788	built_models/moldata/GraphConv/0924-0334/
activity_1510	virus	69.88	74.67	0.68	0.8134	built_models/moldata/GraphConv/0924-0334/
activity_651610	virus	83.53	33.77	3.14	0.6745	built_models/moldata/GraphConv/0924-0334/
activity_652162	virus	75.6	28.95	0.33	0.5802	built_models/moldata/GraphConv/0924-0334/
activity_651640	virus	44.7	70.73	1.98	0.6099	built_models/moldata/GraphConv/0924-0334/
activity_504558	virus	78.76	62.03	3.12	0.7487	built_models/moldata/GraphConv/0924-0334/
activity_602346	virus	41.12	70.47	0.53	0.6164	built_models/moldata/GraphConv/0924-0334/
activity_602342	virus	71.12	47.19	0.5	0.6538	built_models/moldata/GraphConv/0924-0334/
activity_623901	virus	93.44	21.28	0.53	0.6571	built_models/moldata/GraphConv/0924-0334/
activity_841	virus	70.52	25.71	1.56	0.4917	built_models/moldata/GraphConv/0924-0334/
activity_588519	virus	60.49	74	1.2	0.7266	built_models/moldata/GraphConv/0924-0334/
activity_651702	virus	75.01	65.58	2.11	0.7902	built_models/moldata/GraphConv/0924-0334/
activity_588497	virus	99.08	1.25	0.4	0.63	built_models/moldata/GraphConv/0924-0334/
activity_588501	virus	86.17	58.33	0.82	0.8017	built_models/moldata/GraphConv/0924-0334/
activity_504577	virus	82.32	25.76	0.56	0.5391	built_models/moldata/GraphConv/0924-0334/
activity_1347131	virus	78.46	65.89	2.58	0.7956	built_models/moldata/GraphConv/0924-0334/
activity_1159524	virus	76.6	67.98	5.7	0.7971	built_models/moldata/GraphConv/0924-0334/
activity_1259415	virus	60.94	65.41	9.42	0.6832	built_models/moldata/GraphConv/0924-0334/
activity_651820	virus	85.85	49.43	17.54	0.8069	built_models/moldata/GraphConv/0924-0334/
activity_720580	virus	79.22	55.71	2.5	0.7523	built_models/moldata/GraphConv/0924-0334/
activity_720579	virus	80.61	59.53	3.37	0.7614	built_models/moldata/GraphConv/0924-0334/
activity_2472	virus	80.48	74.26	3.49	0.8476	built_models/moldata/GraphConv/0924-0334/
activity_2451	virus	79.39	75.97	2.74	0.8714	built_models/moldata/GraphConv/0924-0334/
activity_493011	virus	63.37	71.25	0.96	0.7495	built_models/moldata/GraphConv/0924-0334/
activity_493012	virus	71.84	80.29	1.21	0.8247	built_models/moldata/GraphConv/0924-0334/
activity_1053197	virus	71.89	61.32	1.73	0.7216	built_models/moldata/GraphConv/0924-0334/
activity_624416	virus	97.52	25.52	4.24	0.7944	built_models/moldata/GraphConv/0924-0334/
activity_2234	virus	74.95	64.52	0.51	0.7637	built_models/moldata/GraphConv/0924-0334/
activity_1845	virus	88.81	76	1.13	0.9009	built_models/moldata/GraphConv/0924-0334/
activity_492947	virus	87.81	75	0.08	0.855	built_models/moldata/GraphConv/0924-0334/

## Sheet: diabetes
AID	run_type	accuracy_score	recall_score	precision_score	roc_auc_score	model_dir
diabetes	diabetes	69.87	64.51	3.83	0.7413	built_models/moldata/GraphConv/0924-0334/
activity_2732	diabetes	85.62	36.75	9.72	0.7303	built_models/moldata/GraphConv/0924-0334/
activity_624417	diabetes	76.81	66.67	6.07	0.7949	built_models/moldata/GraphConv/0924-0334/
activity_624418	diabetes	87	56.99	1.13	0.814	built_models/moldata/GraphConv/0924-0334/
activity_504327	diabetes	86.4	52.67	1.76	0.7507	built_models/moldata/GraphConv/0924-0334/
activity_624172	diabetes	93.16	0	0	0.2795	built_models/moldata/GraphConv/0924-0334/
activity_2675	diabetes	64.56	66.67	0.13	0.6497	built_models/moldata/GraphConv/0924-0334/
activity_1259318	diabetes	89.52	52.28	4.09	0.8375	built_models/moldata/GraphConv/0924-0334/
activity_624171	diabetes	72.95	80.56	1.16	0.8488	built_models/moldata/GraphConv/0924-0334/
activity_720707	diabetes	70.82	80.77	0.19	0.8554	built_models/moldata/GraphConv/0924-0334/
activity_720708	diabetes	71.68	74.6	0.44	0.827	built_models/moldata/GraphConv/0924-0334/
activity_720709	diabetes	56.93	92.55	0.54	0.8945	built_models/moldata/GraphConv/0924-0334/
activity_720711	diabetes	85.59	73.08	0.69	0.8595	built_models/moldata/GraphConv/0924-0334/
activity_1224865	diabetes	86.81	57.23	1.81	0.7932	built_models/moldata/GraphConv/0924-0334/
activity_493187	diabetes	68.83	82.93	0.32	0.8189	built_models/moldata/GraphConv/0924-0334/
activity_2642	diabetes	63.1	83.78	3.24	0.8056	built_models/moldata/GraphConv/0924-0334/
activity_1656	diabetes	60.65	72.41	0.72	0.7137	built_models/moldata/GraphConv/0924-0334/
activity_743287	diabetes	65	55.2	1.2	0.6423	built_models/moldata/GraphConv/0924-0334/
activity_651687	diabetes	93.42	21.52	0.91	0.7005	built_models/moldata/GraphConv/0924-0334/
activity_651723	diabetes	81.14	39.33	0.64	0.6778	built_models/moldata/GraphConv/0924-0334/
activity_435005	diabetes	60.16	77.47	2.09	0.762	built_models/moldata/GraphConv/0924-0334/
activity_602332	diabetes	87.77	10	0.02	0.4895	built_models/moldata/GraphConv/0924-0334/
activity_2685	diabetes	11.21	92.11	1.05	0.5688	built_models/moldata/GraphConv/0924-0334/
activity_651560	diabetes	84.37	64.85	1.79	0.8445	built_models/moldata/GraphConv/0924-0334/
activity_588621	diabetes	93.43	43.81	1.91	0.7789	built_models/moldata/GraphConv/0924-0334/
activity_493160	diabetes	92.77	53.06	2.1	0.8383	built_models/moldata/GraphConv/0924-0334/
activity_449763	diabetes	79	55.7	1.3	0.7396	built_models/moldata/GraphConv/0924-0334/
activity_463104	diabetes	91.29	43.62	2.34	0.8309	built_models/moldata/GraphConv/0924-0334/
activity_2380	diabetes	8.67	93.67	0.25	0.6026	built_models/moldata/GraphConv/0924-0334/
activity_651582	diabetes	75.14	60.16	2.4	0.7438	built_models/moldata/GraphConv/0924-0334/
activity_1490	diabetes	66.41	72.9	9.86	0.7585	built_models/moldata/GraphConv/0924-0334/
activity_651800	diabetes	59.56	76.07	0.8	0.7537	built_models/moldata/GraphConv/0924-0334/
activity_493087	diabetes	44.05	80.77	0.11	0.676	built_models/moldata/GraphConv/0924-0334/
activity_434962	diabetes	80.08	61.14	1.68	0.7826	built_models/moldata/GraphConv/0924-0334/
activity_631	diabetes	60.57	80.81	0.81	0.769	built_models/moldata/GraphConv/0924-0334/
activity_731	diabetes	88.76	50	1.18	0.8159	built_models/moldata/GraphConv/0924-0334/
activity_2648	diabetes	79.2	76.23	1.46	0.8357	built_models/moldata/GraphConv/0924-0334/
activity_1259401	diabetes	58.31	67.65	22.22	0.6544	built_models/moldata/GraphConv/0924-0334/
activity_1259402	diabetes	49.9	83.78	11.15	0.7629	built_models/moldata/GraphConv/0924-0334/
activity_1259403	diabetes	50.21	81.51	31.29	0.6789	built_models/moldata/GraphConv/0924-0334/
activity_1259404	diabetes	53	86.96	10.15	0.8122	built_models/moldata/GraphConv/0924-0334/
activity_1159519	diabetes	55.24	81.25	4.89	0.738	built_models/moldata/GraphConv/0924-0334/
activity_743239	diabetes	52.02	60.87	4.64	0.6442	built_models/moldata/GraphConv/0924-0334/
activity_743240	diabetes	63.45	73.68	14.29	0.7	built_models/moldata/GraphConv/0924-0334/

[truncated: 23 more sheets: metabolic disorders, bacteria, parasite, epigenetics_genetics, pulmonary, infection, aging, fungal, all_target, Membrane receptor, Enzyme (other), Nuclear receptor, Hydrolase, Protease, Transcription factor, Kinase, Epigenetic regulator, Ion channel, Transferase, Oxidoreductase …]
